# Supplementary material for: Development of background-free tame fluorescent probes for intracellular live cell imaging
Source: PubMed Central journal article supplement (PMC4915154; doi:10.1038/ncomms11964), 2016-06-20
Supplement: ncomms11964-s1.pdf [file ncomms11964-s1.pdf]

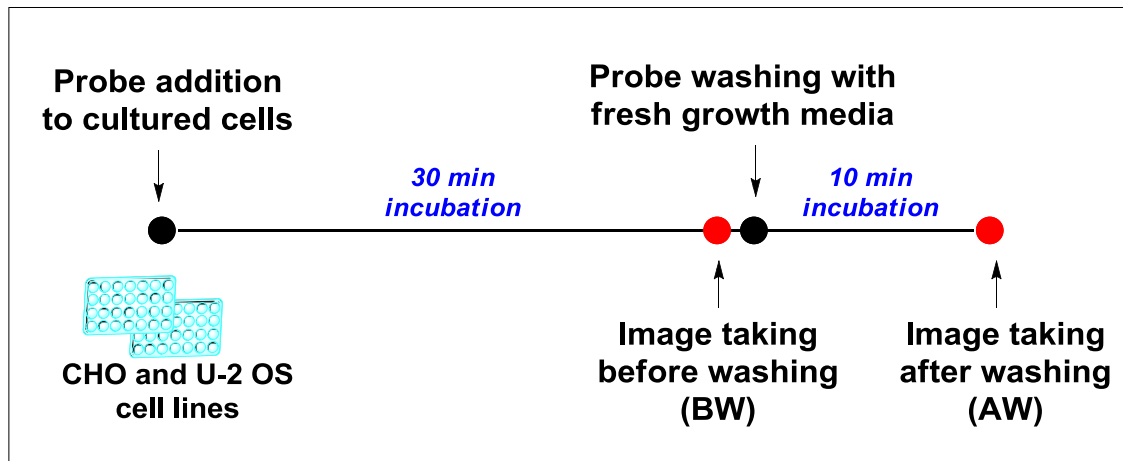

**Supplementary Figure 1. Flowchart for cellular retention and influx-efflux study**

200 uL fresh growth media containing probes in final concentration of 1  $\mu$ M and nuclei dye Hoechst33342 was added into cultured cells. Cells were incubated for 30 minutes at 37 °C then were imaged (BW) using ImageXpress Micro™ cellular imaging system (Molecular Device). Immediately after image acquisition, the cells were washed with fresh growth media, and transferred back to a 37 °C cell incubator for further incubation. After 10 minutes, cells were again imaged (after washing image, AW). The first imaging step allowed in-flux measurement of before washing image (BW), while the second imaging step allowed out-flux measurement of after washing image (AW).

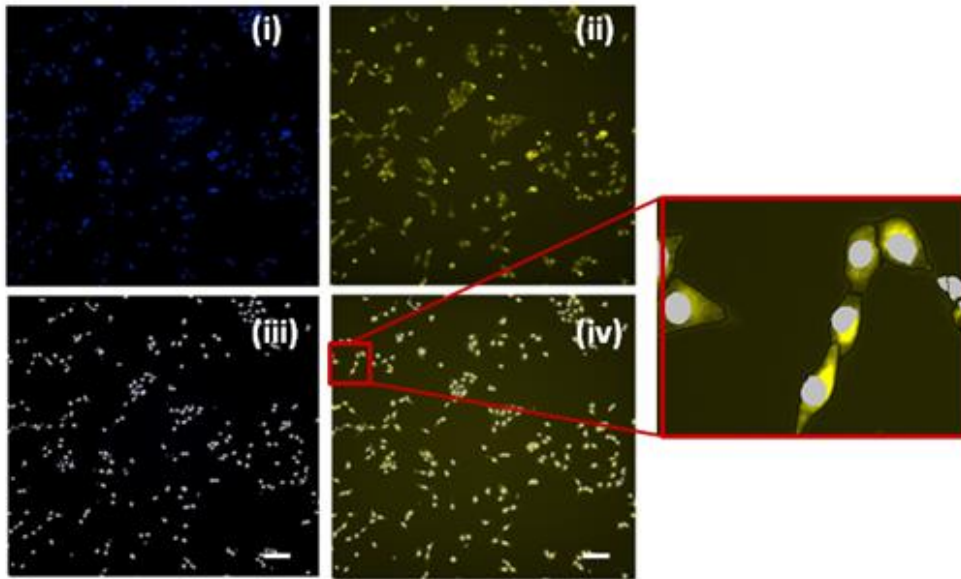

**Supplementary Figure 2. Cell segmentation for quantitative image analysis.**

(i) nuclear staining with Hoesch33324, (ii) probes staining throughout the cell, (iii) segmentation of nuclei from (i), (iv) segmentation of nuclei-cytoplasm from (ii) for spatial region for readout of fluorescence response. Segmentation provides approximate cellular boundaries for cell-by-cell basis fluorescence intensity quantification. Scale bar 150  $\mu\text{m}$ .

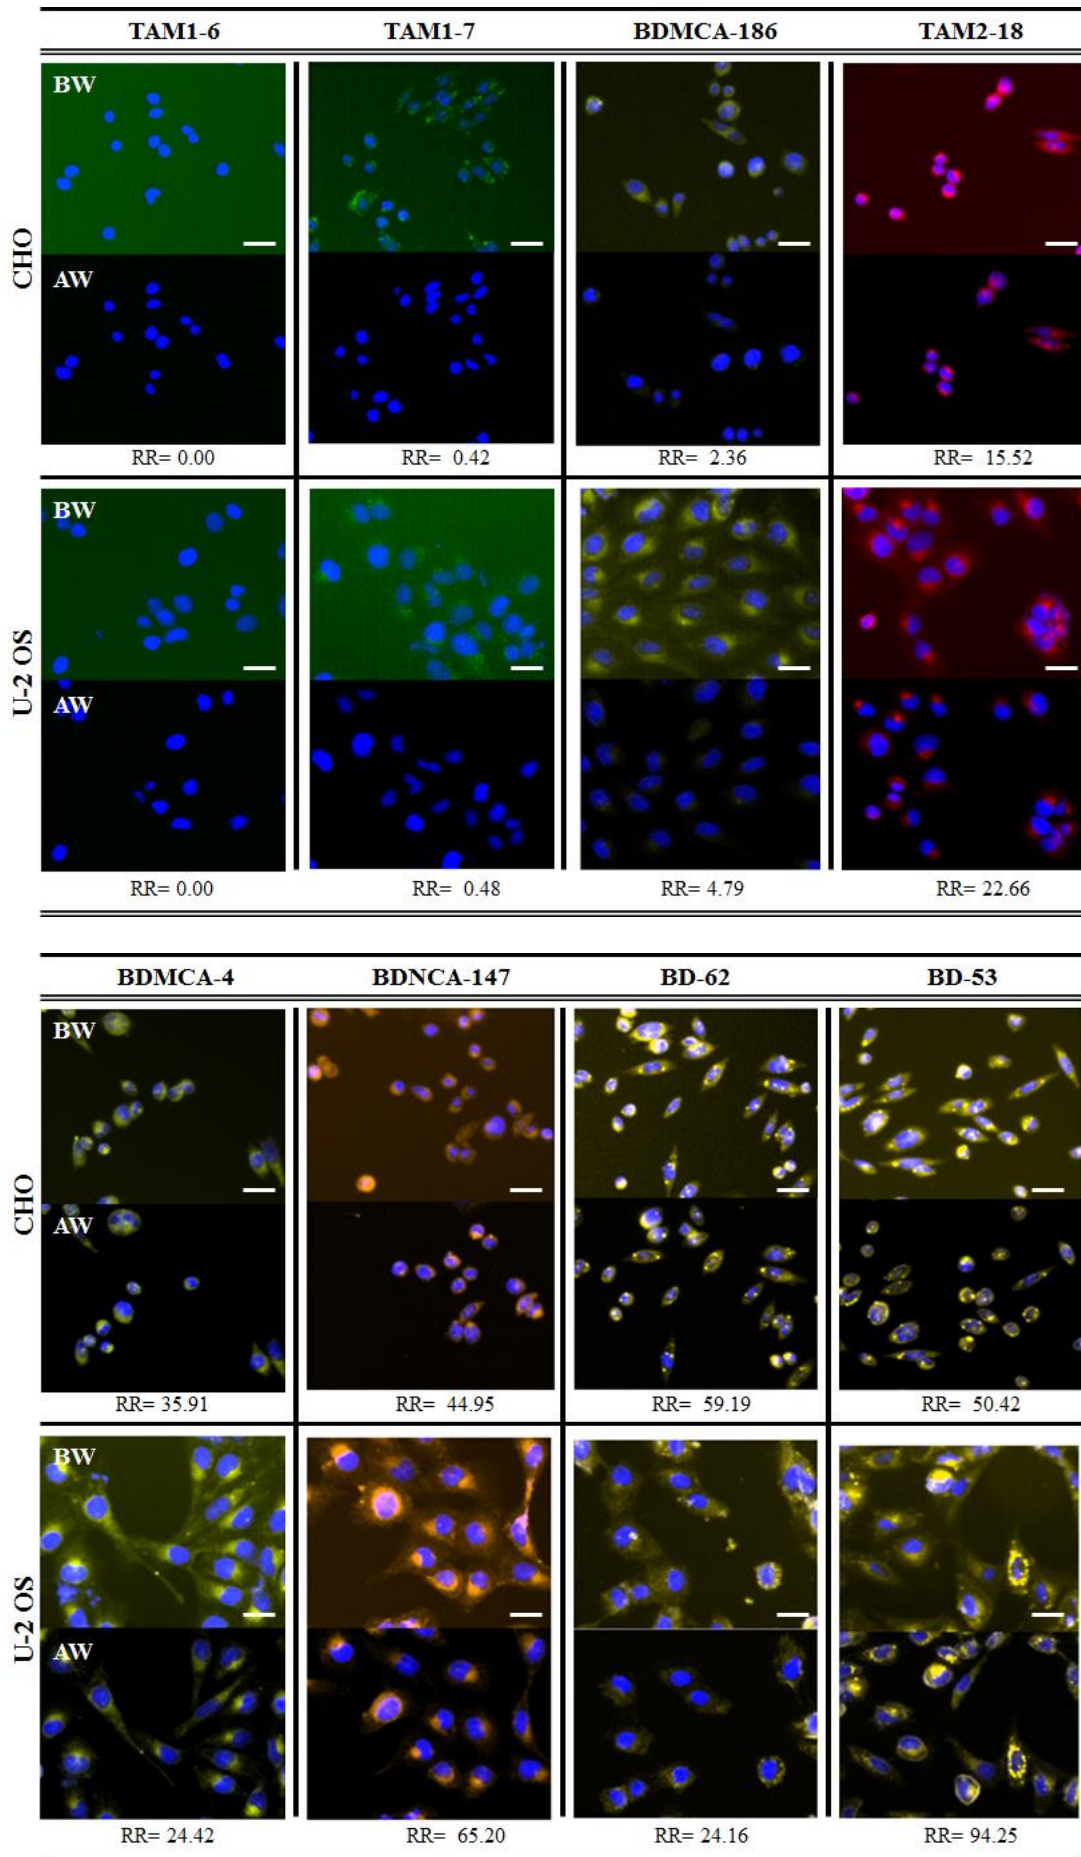

### **Supplementary Figure 3. Representative overlaid images for different RR value.**

Probes were incubated in U-2 OS and CHO cell lines at 1 uM final concentration. BW and AW indicate image before and after washing, respectively. Blue is Hoechst33324 signal and green, yellow, orange, red are probes signals according to emission wavelength of the probes. RR value is ranging from 0 to 100. Zero value indicates cell-impermeable probes,  $0 < RR \leq 5$  indicates cell-permeable probes with minimal background and  $RR > 5$  shows cell-permeable with high nonspecific binding probes. Scale bar, 20  $\mu\text{m}$ .

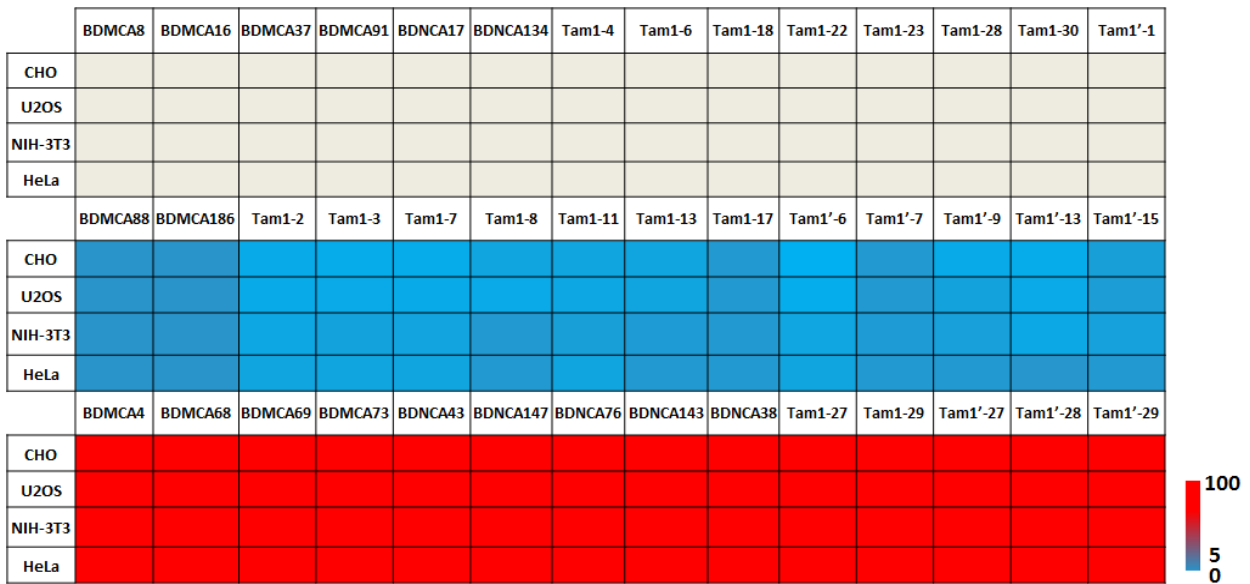

**Supplementary Figure 4. Heat map of representative probes in CHO, U-2 OS, NIH-3T3 and HeLa.**

Heatmap shows that probes behave similarly in the four cell lines. Grey color represents probes in N-group. The red and torquise color represents high (H-group) and low (L-group) RR value, respectively.

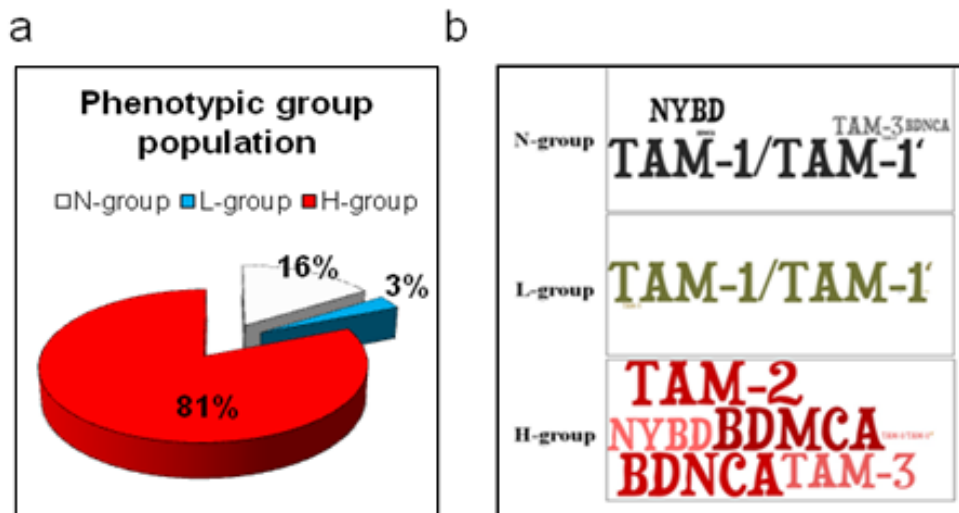

**Supplementary Figure 5. Proportion of BODIPY libraries in each phenotypic group.**

(a) Overall percentage of all probes in each phenotypic group. b) Word clouds diagram for distribution and portion of each library in three groups.

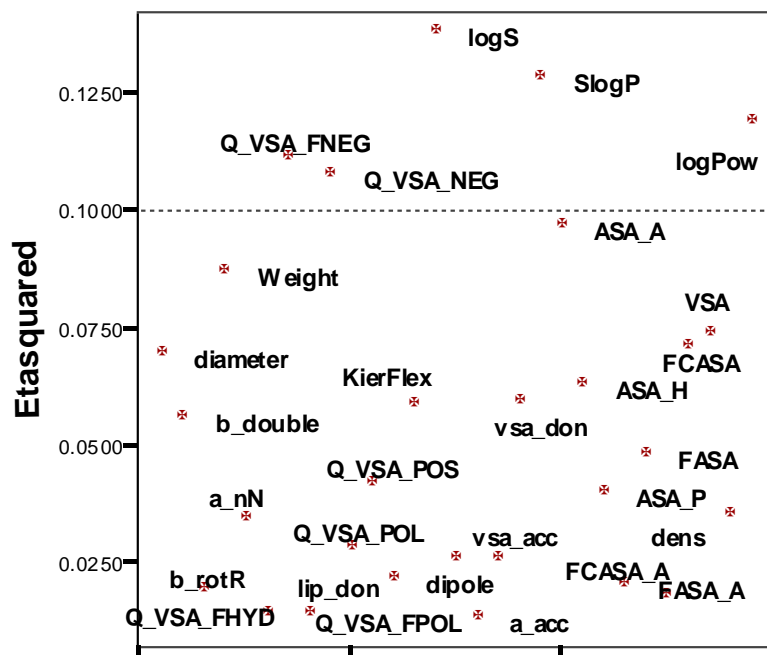

**Supplementary Figure 6. Results of effect size measurement.**

Descriptors with large effect (eta squared  $\eta^2 \geq 0.1$ ) were selected.

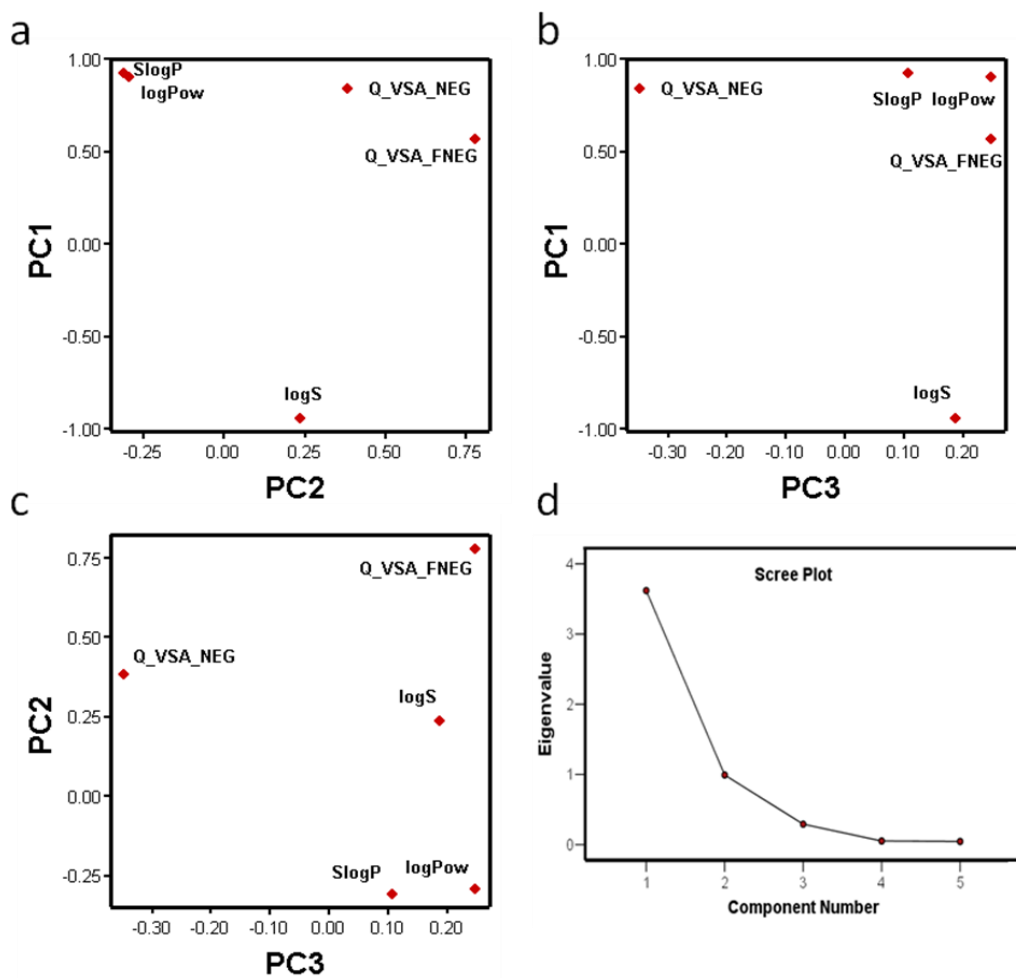

**Supplementary Figure 7. PCA loading plot of five selected descriptors.**

PCA plot. (a) PC1 versus PC2; (b) PC1 versus PC3, and (c) PC2 versus PC3. (d) Scree plot of the eigenvalues with respective component numbers.



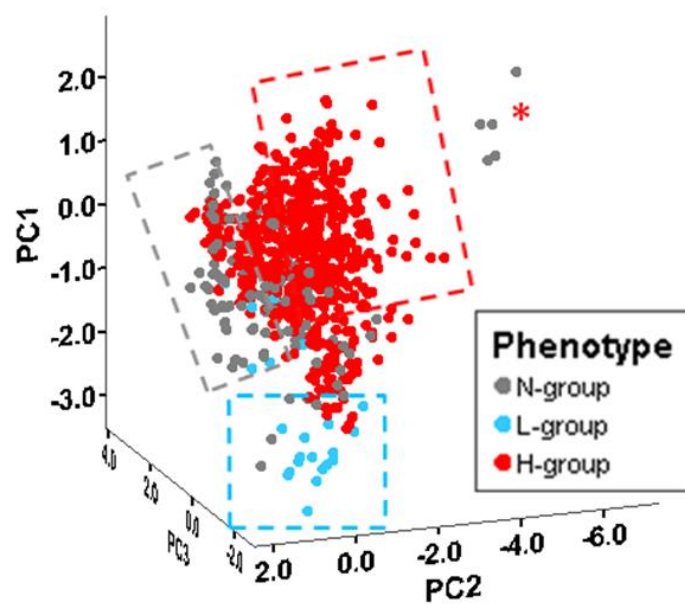

**Supplementary Figure 8. PCA scores plot from probes.**

Grey, turquoise and red dotted box represents area containing mostly compounds from N-group, L-group and H-group, respectively.

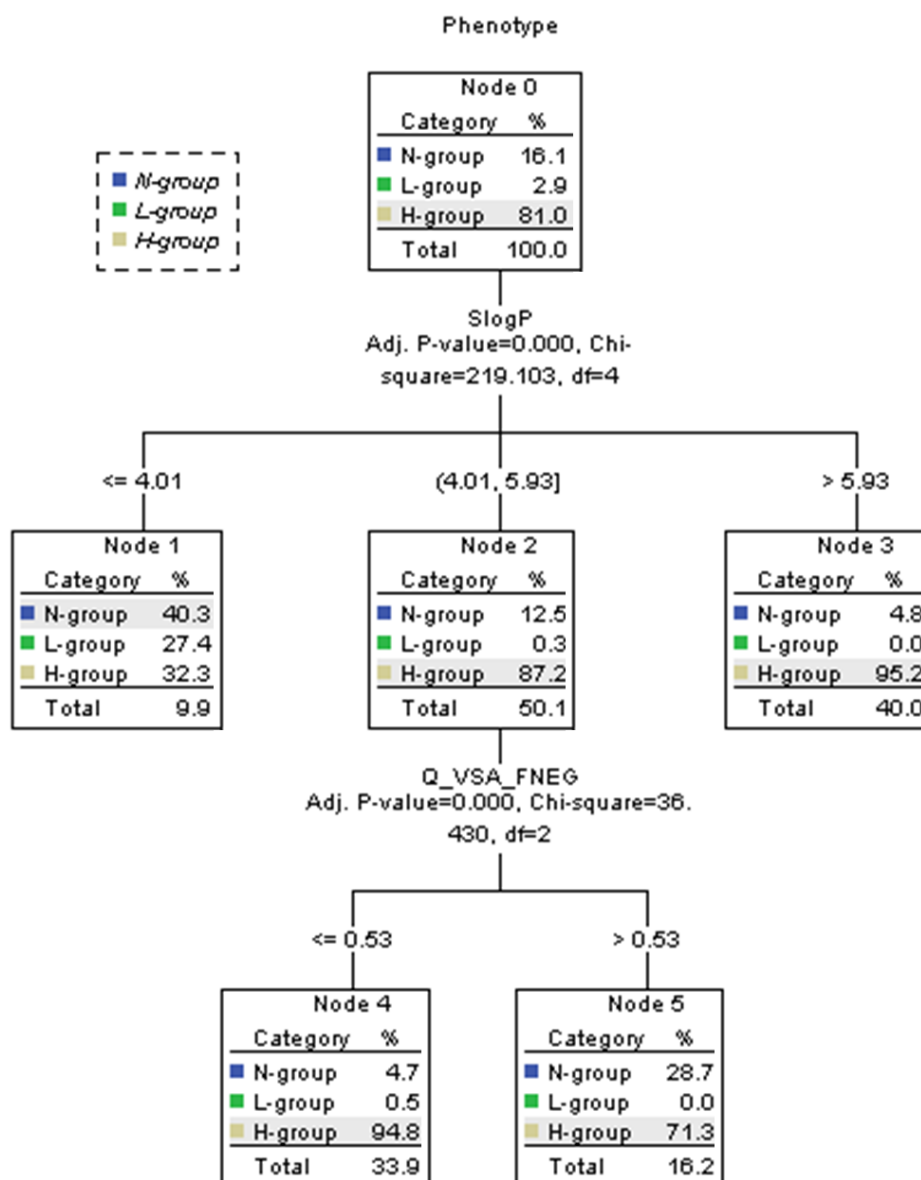

**Supplementary Figure 9. The interactive decision tree diagram for phenotypic grouping of probes.**

The descriptors used for the classification are SlogP, logS and Q\_VSA\_FNEG. Each node is identified with a node number.

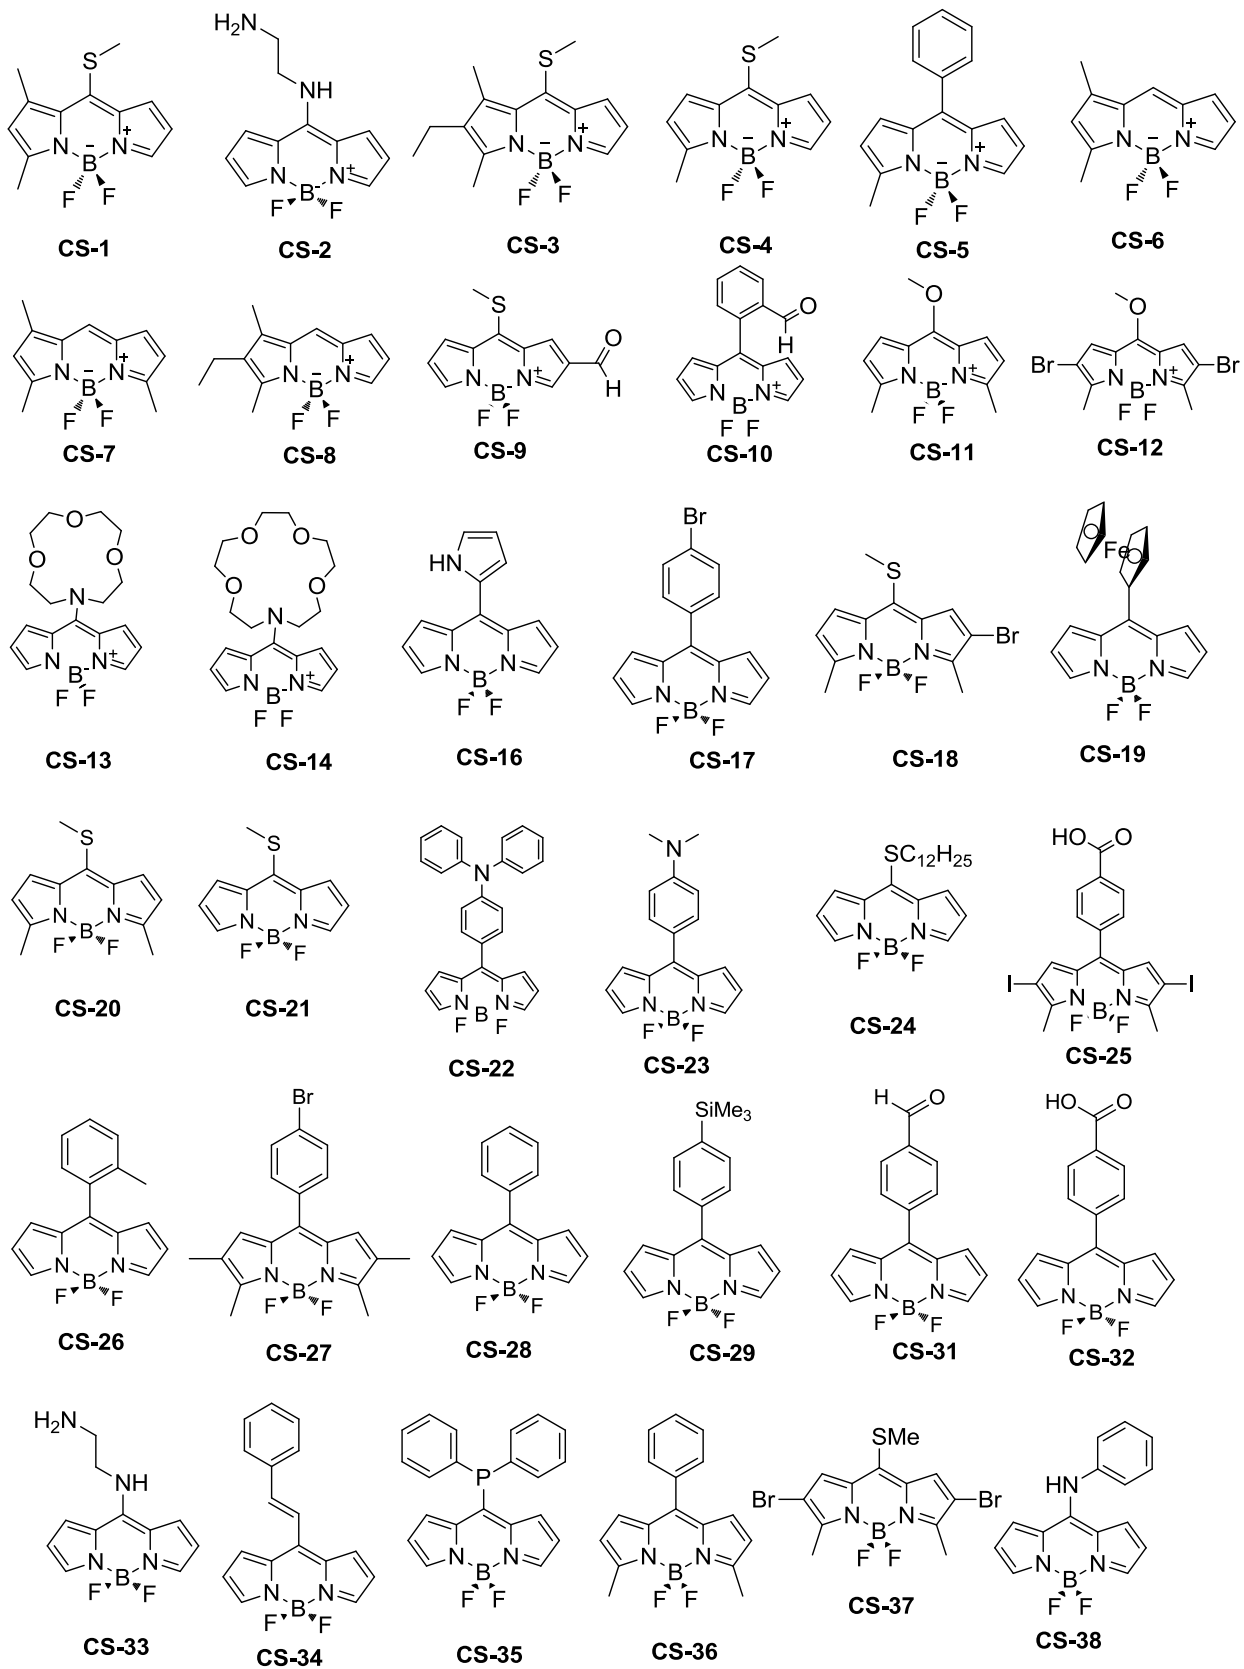

Supplementary Figure 10. Structures of EP library

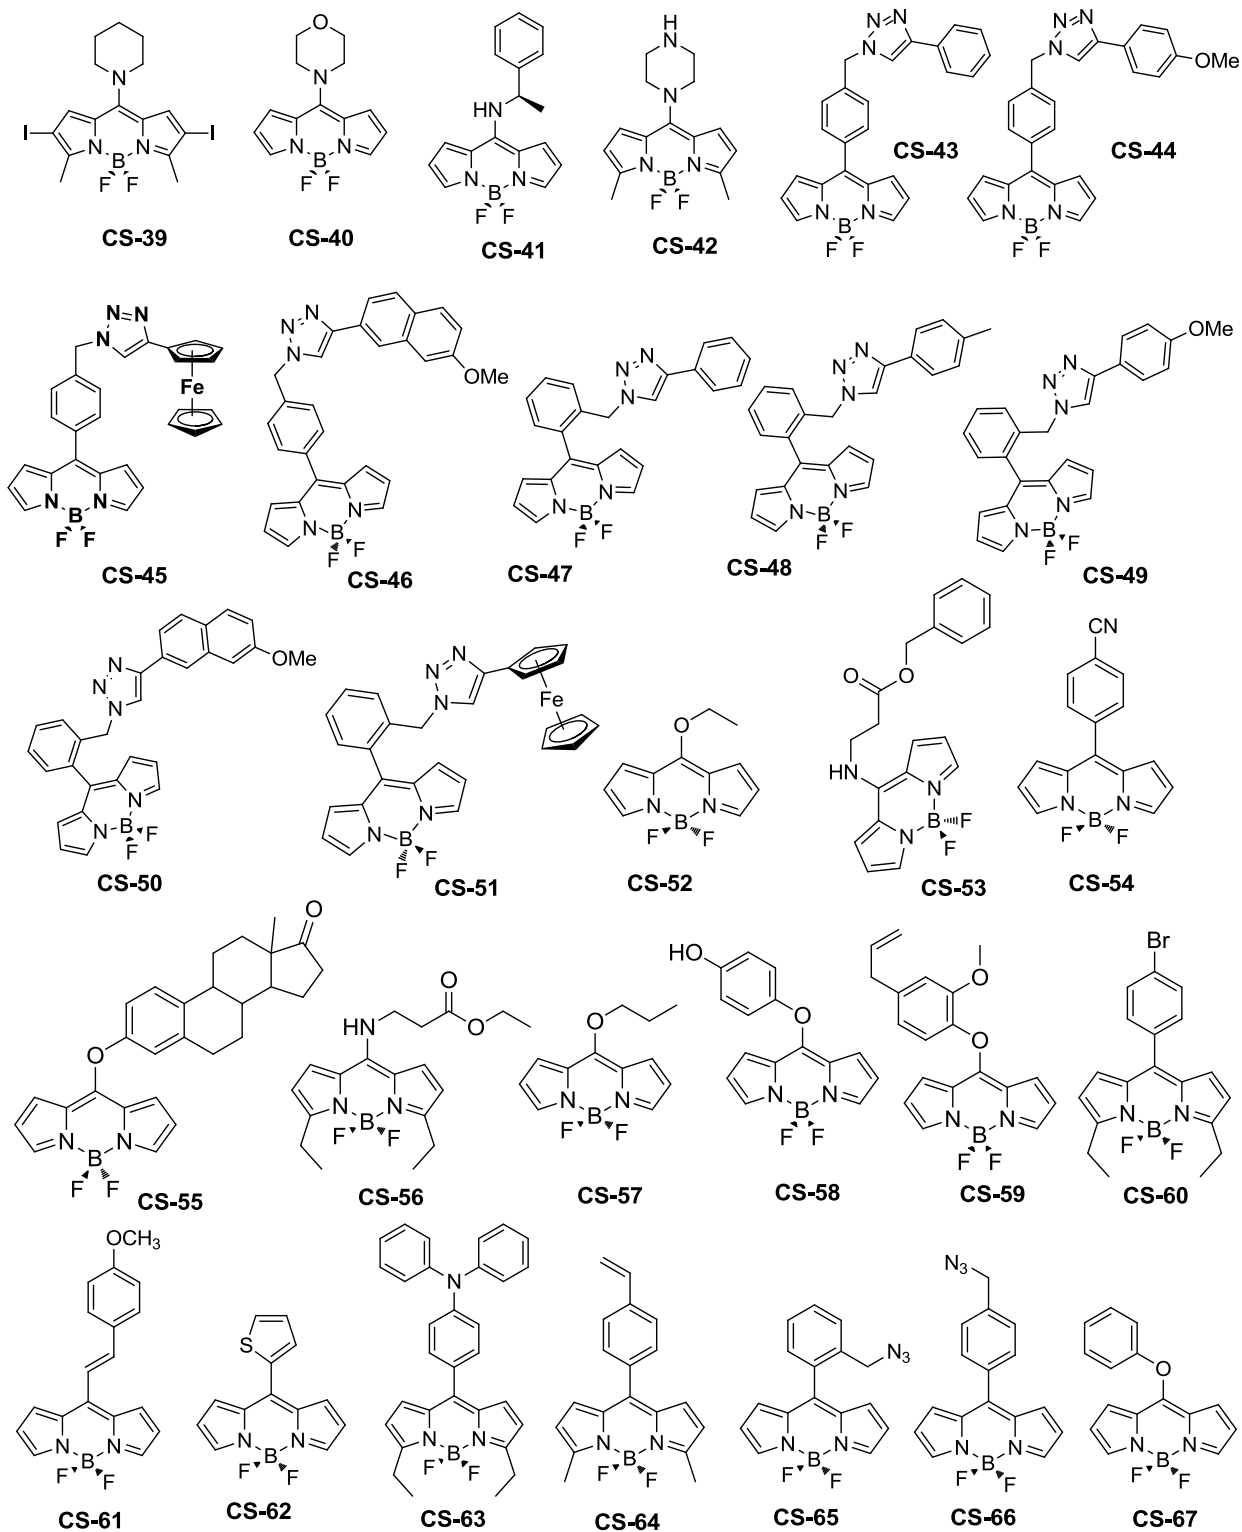

(Cont'd) Supplementary Figure 10. Structures of EP library

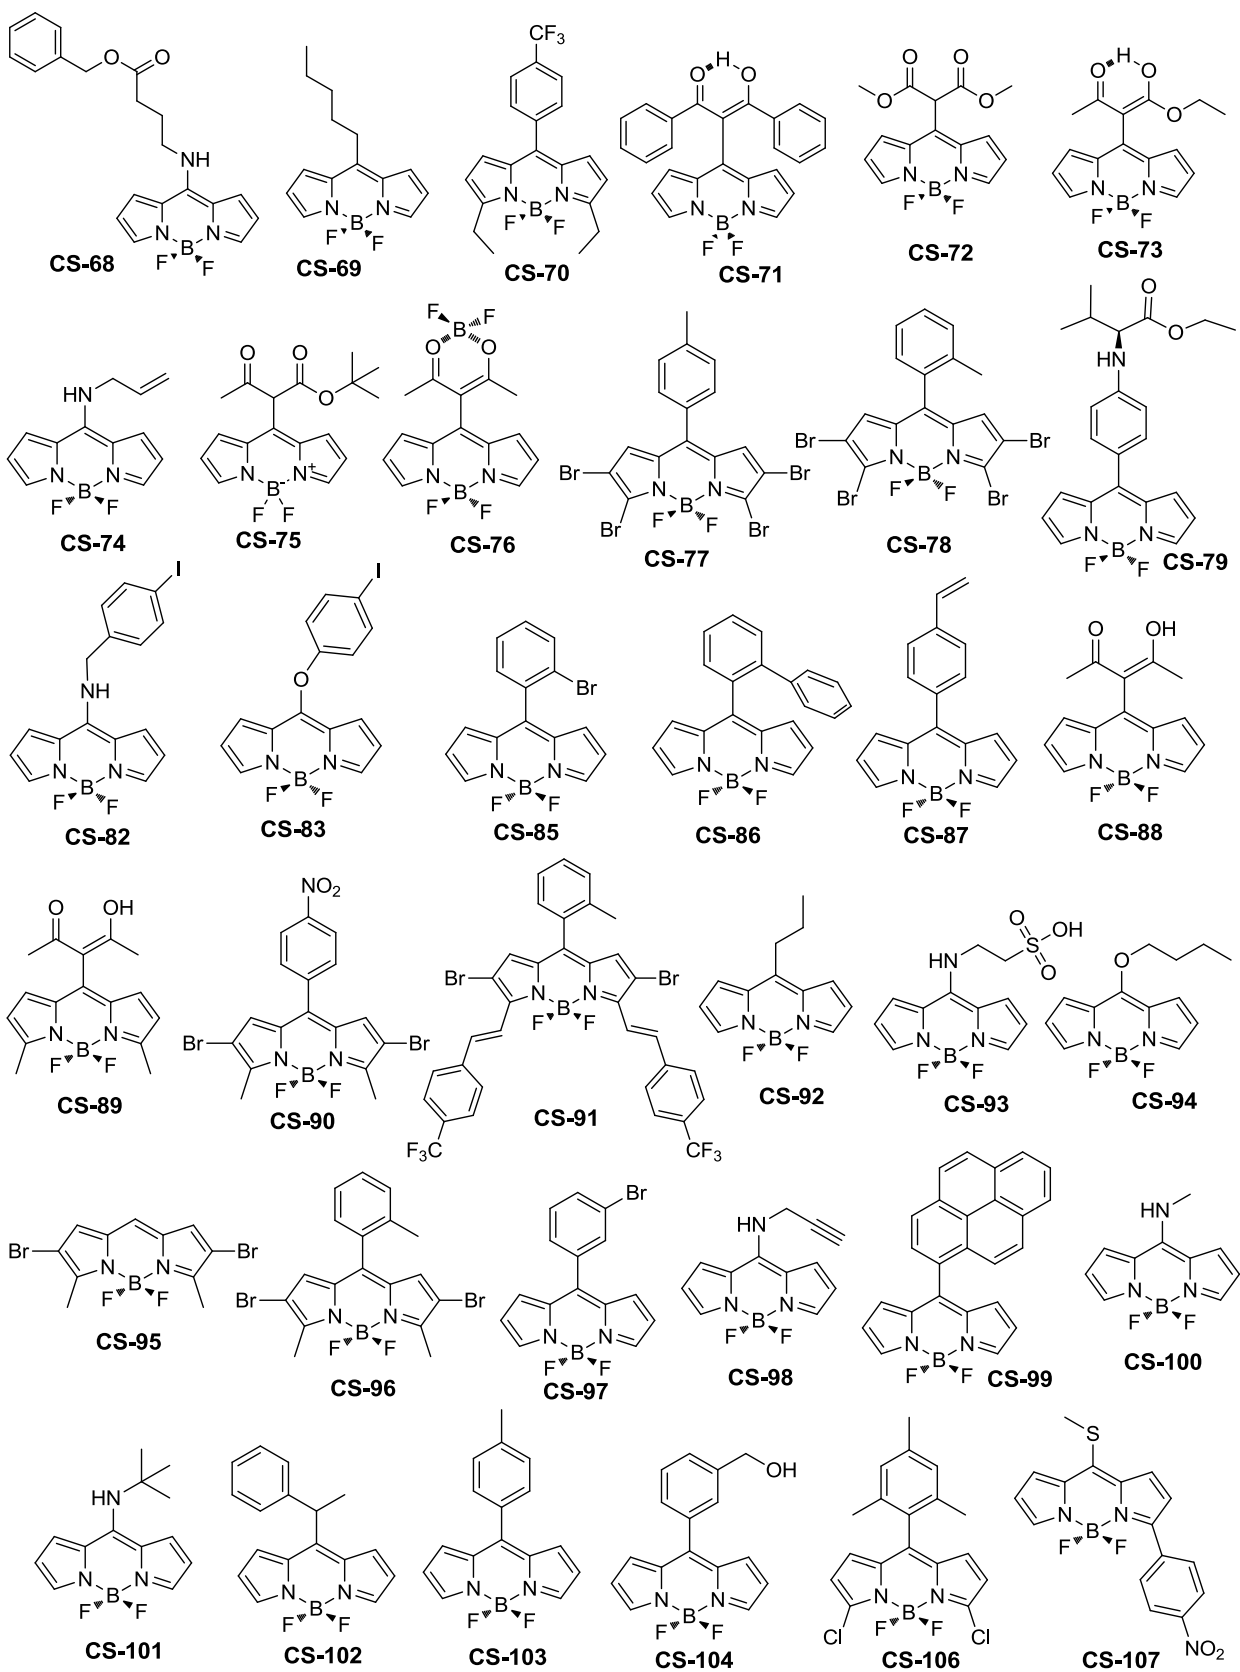

(Cont'd) Supplementary Figure 10. Structures of EP library

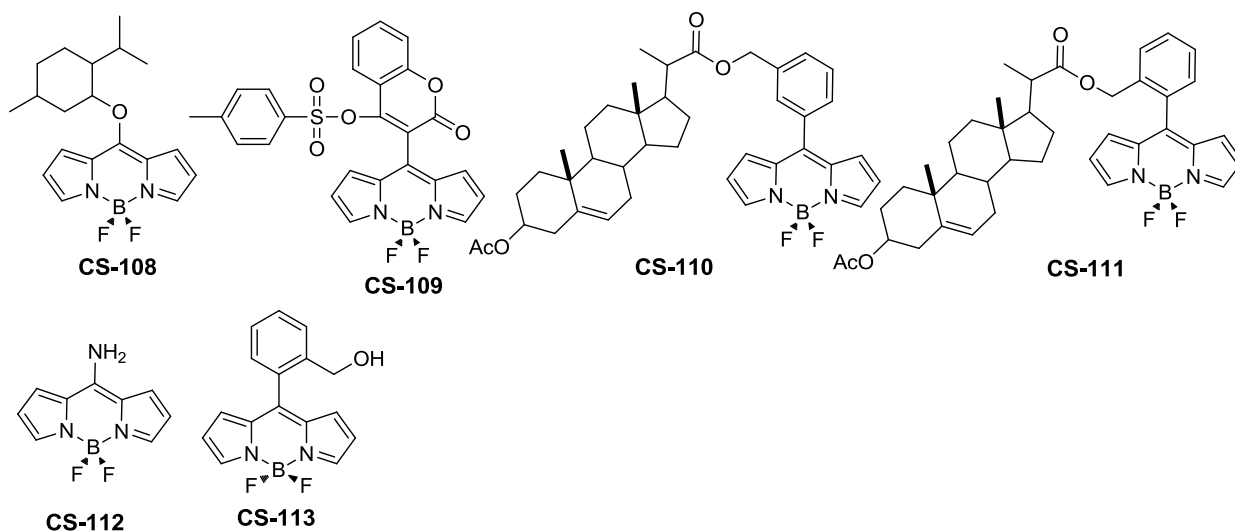

**(Cont'd) Supplementary Figure 10. Structures of EP library.**

The synthesis and characterization of these probes will be published elsewhere.

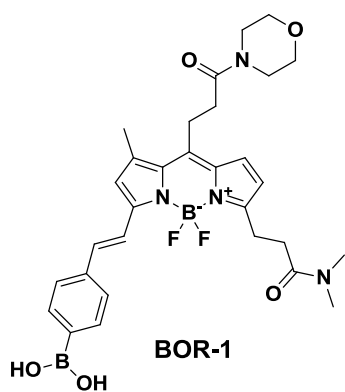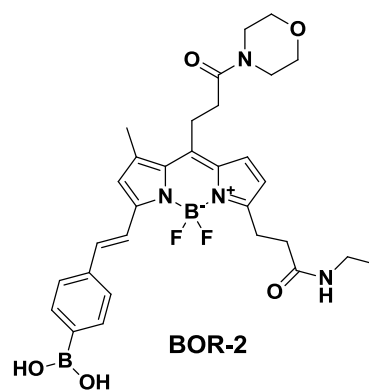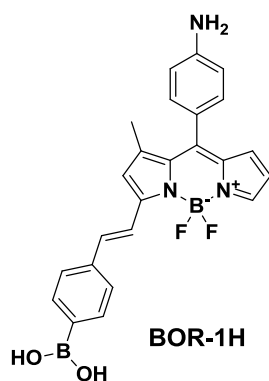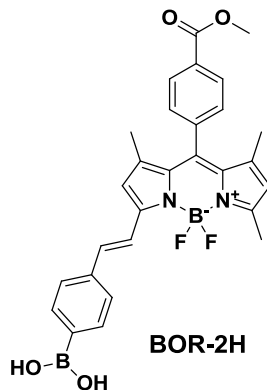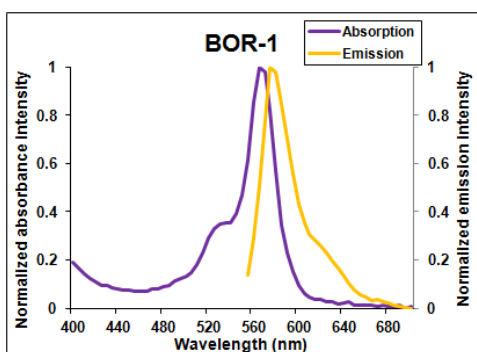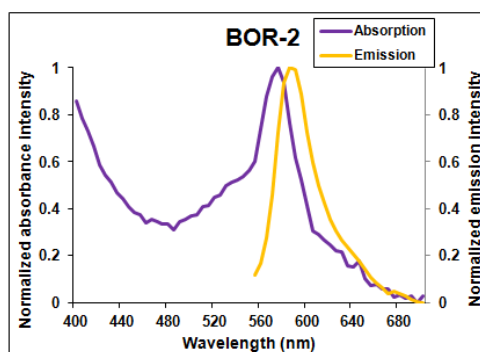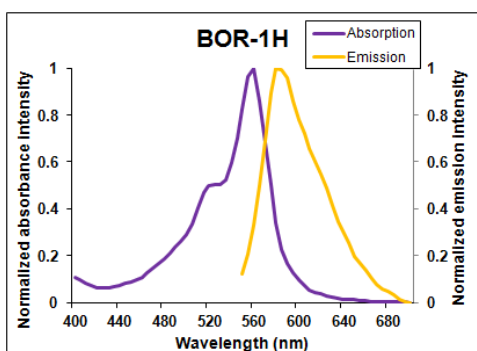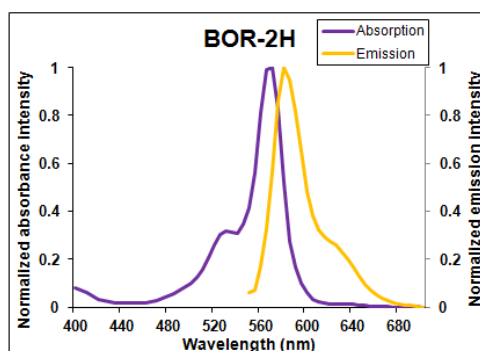

**Supplementary Figure 11. Structure and absorption/emission spectra of BOR-1, BOR-2, BOR-1H and BOR-2H.**

Absorbance and fluorescence emission were measured in DMSO at 10  $\mu$ M of probe concentration.

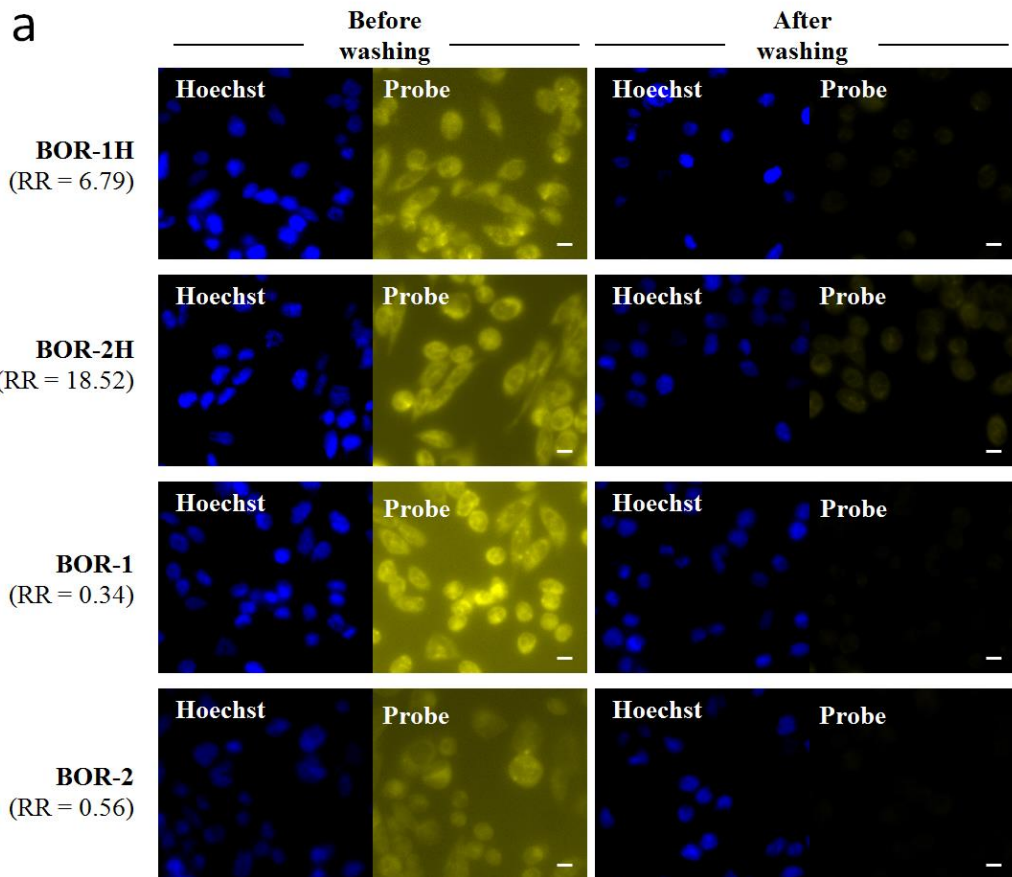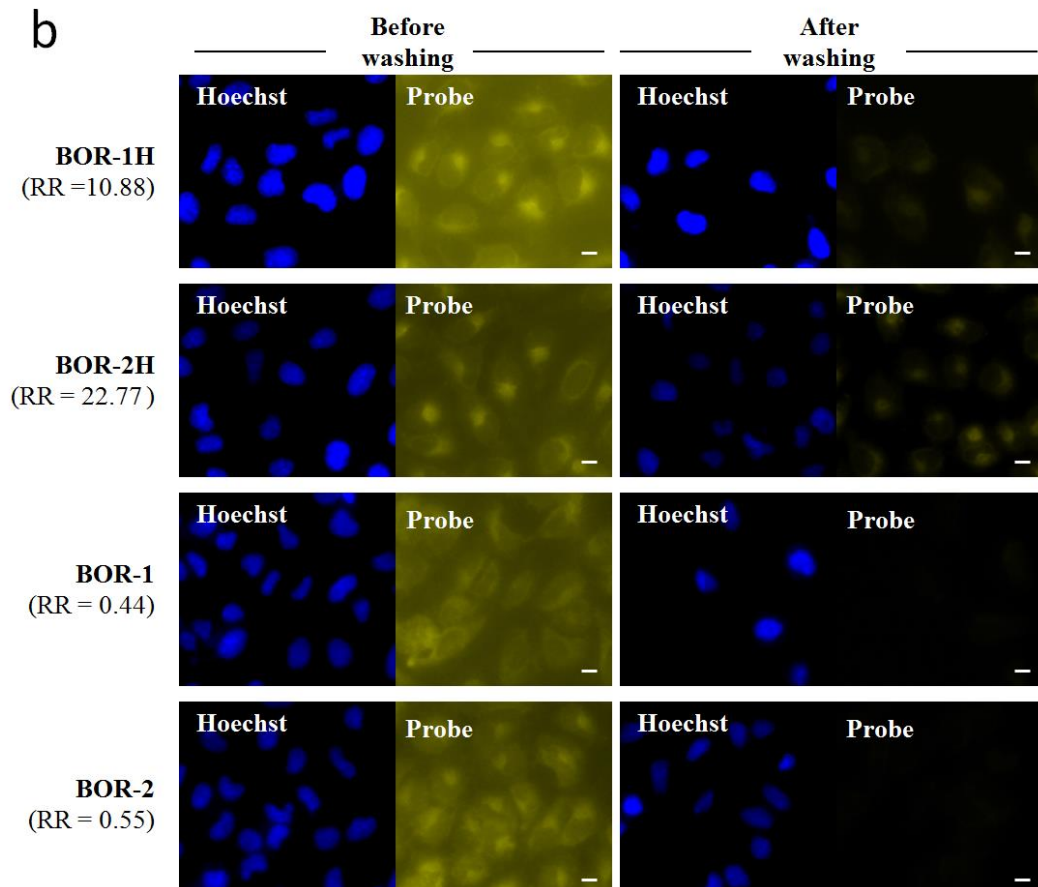



**Supplementary Figure 12 Cellular retention BOR-1, BOR-2, BOR-1H and BOR-2H.**

**in CHO (a) and U-2 OS (b) cells and their RR value.**

Cells were stained with probes at 1 uM final concentration for 30 min. Probe signal is significantly decreased after washing for **BOR-1** and **BOR-2**. (yellow signal from FITC channel and blue signal from DAPI channel). Scale bar, 10  $\mu$ m.

a

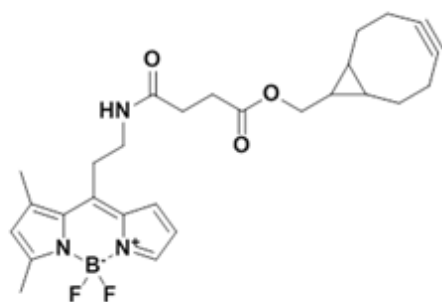

**CO-1**  
SlogP = 3.97  
logS = -5.52  
Q\_VSA\_FNEG = 0.28

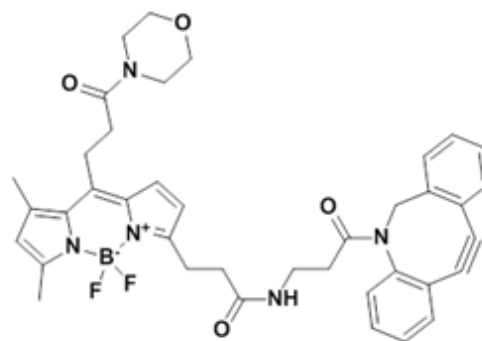

**CO-1H**  
SlogP = 5.21  
logS = -7.35  
Q\_VSA\_FNEG = 0.37

b

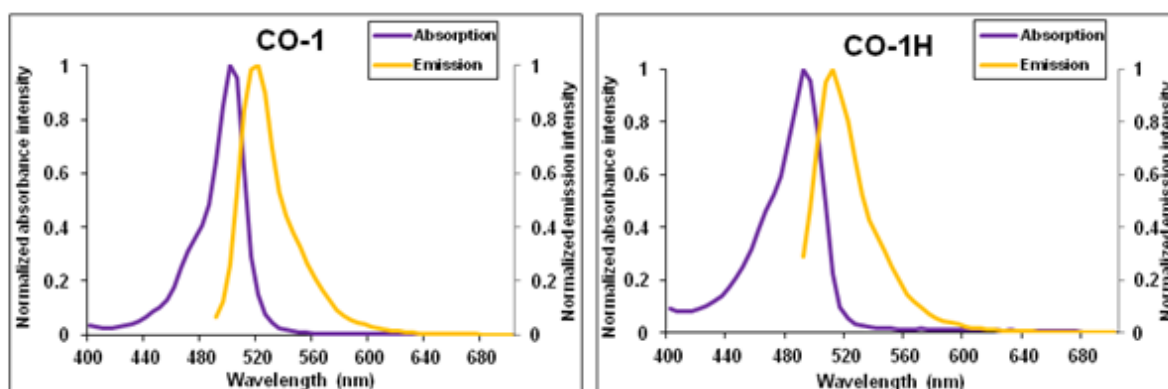

### Supplementary Figure 13 Structure of CO-1 and CO-1H.

(a) Structure of **CO-1** and **CO-1H** and their descriptors values. (b) Absorption and emission spectra of **CO-1** and **CO-1H**. Absorbance and fluorescence emission were measured in DMSO at 10  $\mu$ M of compound concentration.

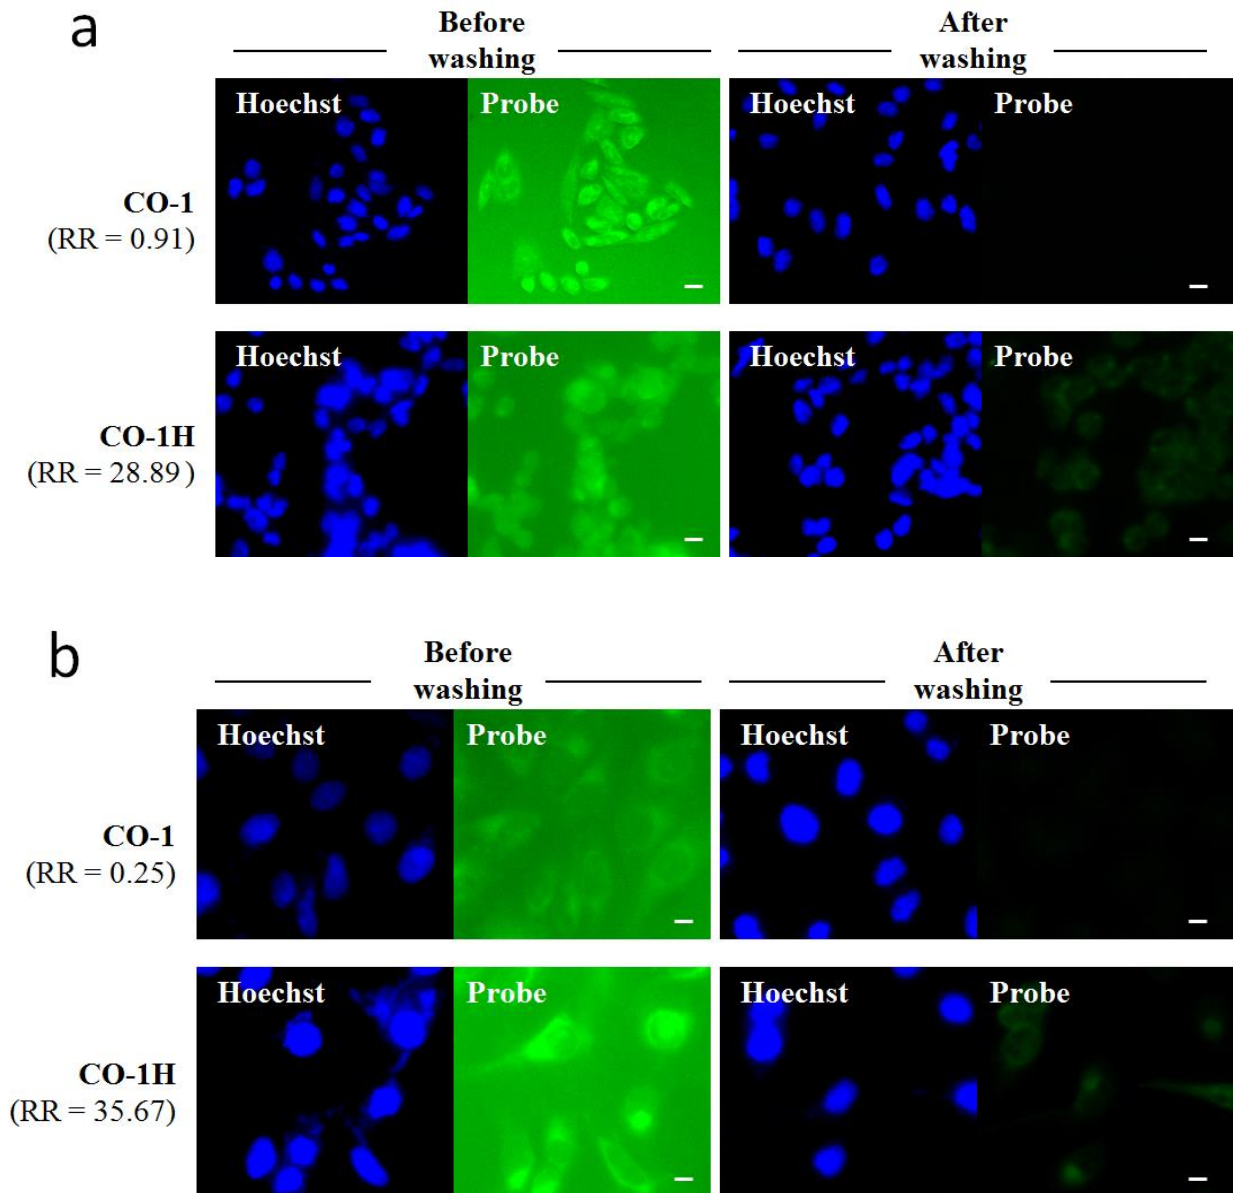

**Supplementary Figure 14 Cellular retention of CO-1 and CO-1H in CHO (a) and U-2 OS**

**(b) cells and their RR value.**

Cells were stained with probes at 1 uM final concentration for 30 min. Both probes were observed to enter the cells, however, **CO-1** leave the cells after washing while **CO-1H** is more retained inside the cells (green signal from FITC channel). Scale bar, 20  $\mu$ m.

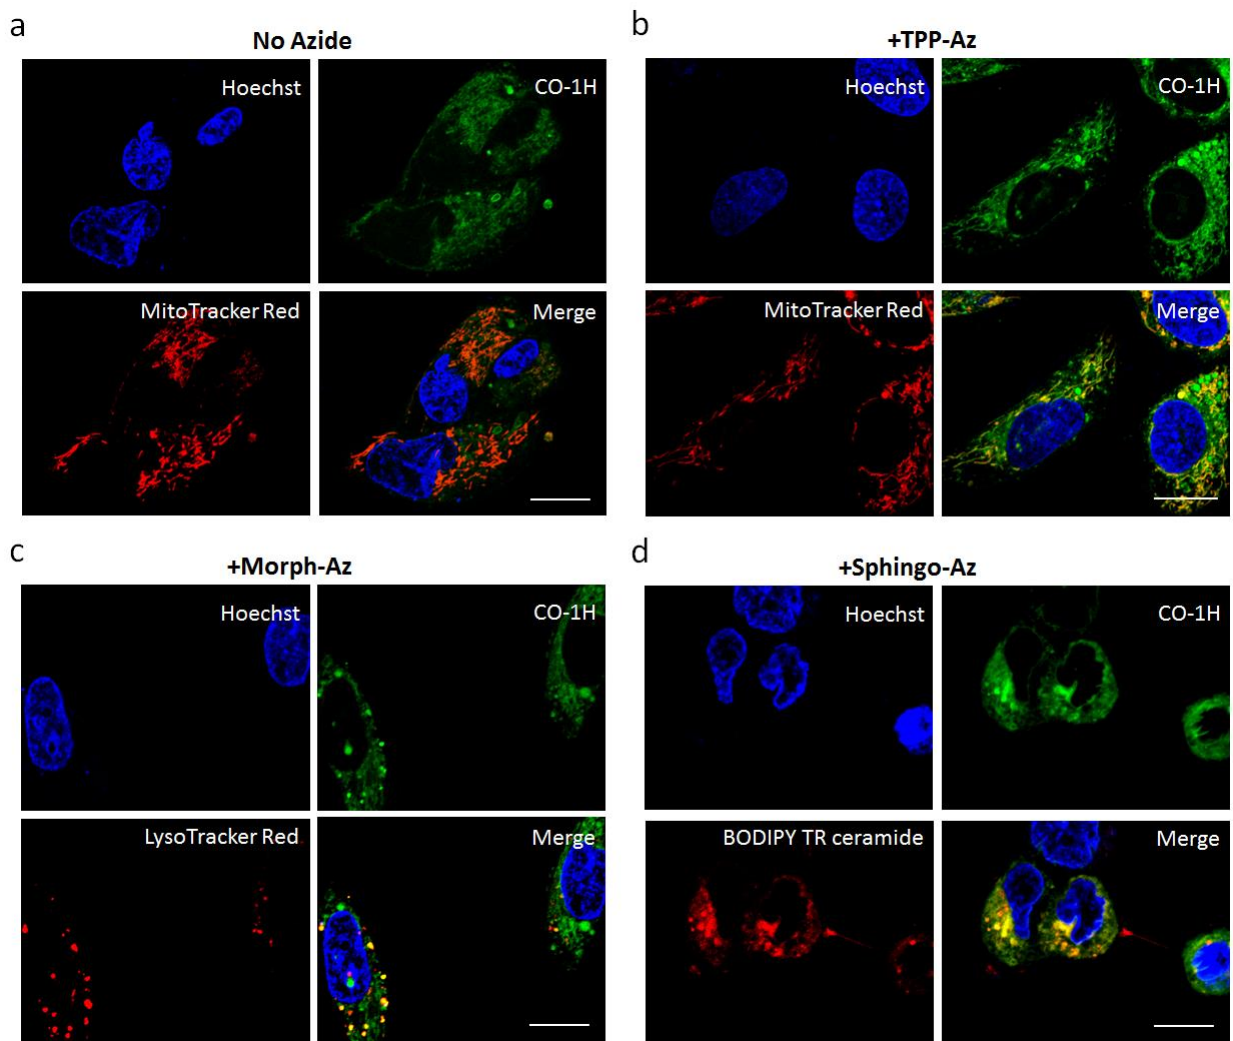

### Supplementary Figure 15 Live cell imaging with CO-1H.

Fluorescence imaging of mitochondria, lysosome and golgi apparatus in U-2 OS cells labeled with **CO-1H**. Cells were incubated: (a) without azide reporter and with (b) **TPP-Az**, (c) **Morph-Az** or (d) **Sphingo-Az** in culture media at 37 °C for 1 hr with 2  $\mu$ M **CO-1H** and followed by counterstaining with organelle trackers. In contrast to **CO-1**, high fluorescence background from **CO-1H** was observed. Scale bar, 15  $\mu$ m.

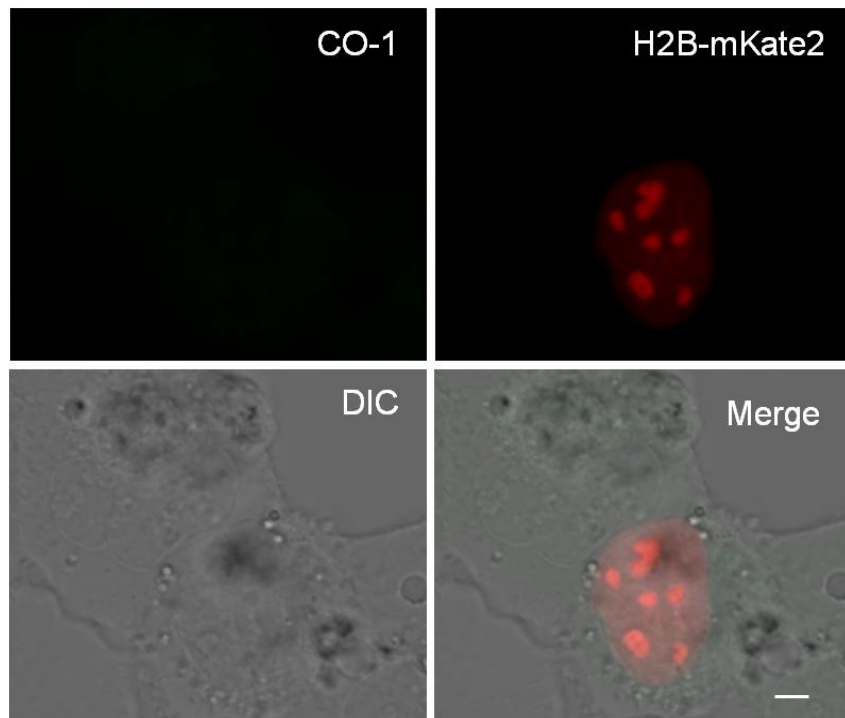

**Supplementary Figure 16 CO-1 did not label wild type H2B-mKate2 in live U-2 OS cells.**

U-2 OS cells were transfected with plasmid pmH2B-6-mKate2. After 24 hours, cells were labeled with 10  $\mu$ M **CO-1** for 90 minutes at 37 °C. Cells were washed to remove the unreacted **CO-1** and then imaged for mKate2 (red) and **CO-1** (green) signals. Scale bar, 5  $\mu$ m.

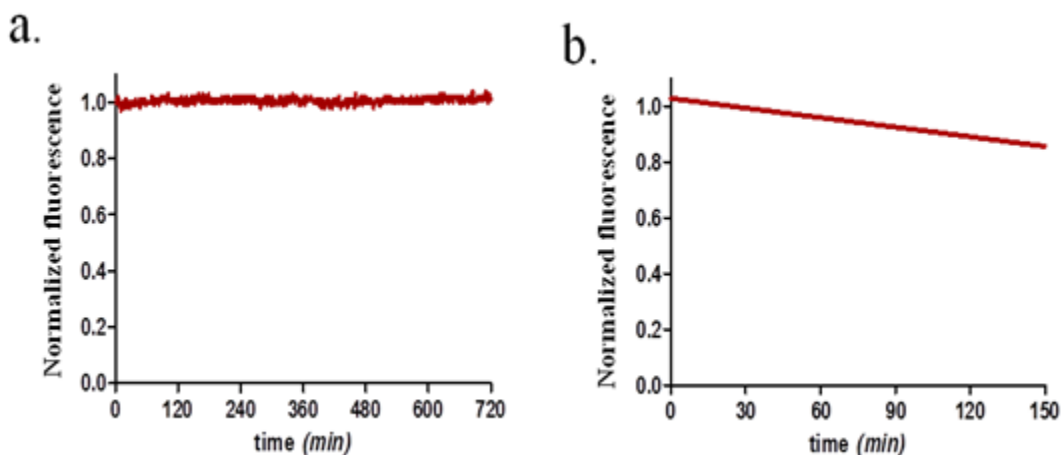

### Supplementary Figure 17 Photostability analysis of CO-1.

10  $\mu\text{M}$  CO-1 solution in PBS buffer (pH 7.4) containing 1% DMSO were placed in a 96-well plates. (a) Fluorescence measurement were recorded every 30 seconds interval for a total period of 12 hours (Ex/Em = 490/520) under a xenon flashlamp. (b) Photostability test under high intensity UV lamp (Blak Ray, 100W, 365 nm). Plates were irradiated for 10 minutes up to 2.5 hours at 10 cm distance. Values are represented as means (n=3) and fitted to a non-linear regression one-phase exponential decay (GraphPad Prism 5.0)

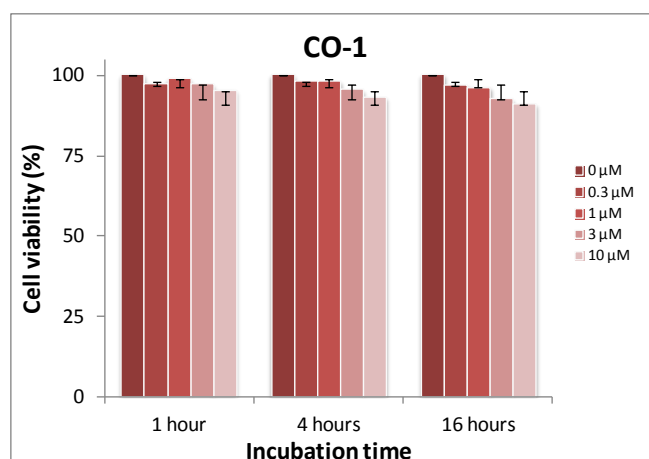

### Supplementary Figure 18 Cell viability test for CO-1.

Cell viability was measured by MTS assay for concentration of probe at 0 μM, 0.3 μM, 1 μM, 3 μM and 10 μM in 1 hour, 4 hours and 16 hours incubation in U-2 OS cells. Absorbance was determined at 490 nm. Each absorbance value was subtracted with blank sample (blank sample = cells containing compound at respective concentration without MTS reagent). Cell viability was calculated by: (viable cells)% = (OD of treated sample/OD of untreated sample)×100. Data are presented as the means ± SD obtained from triplicate experiments.

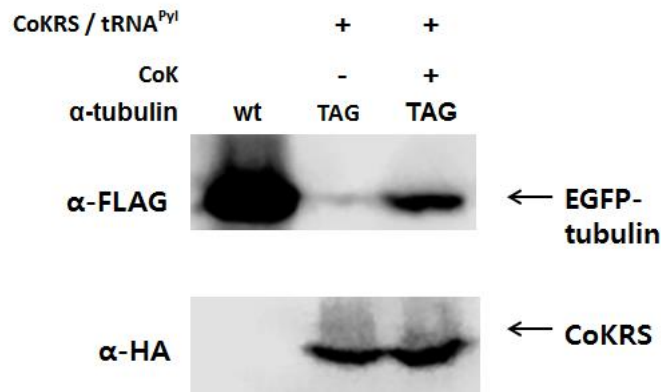

**Supplementary Figure 19 Site-specific incorporation of CoK using an orthogonal tRNA<sup>Pyl</sup>/CoKRS pair.**

HEK293T cells were transfected with pCoKRS-tRNA (containing tRNA<sup>Pyl</sup>/CoKRS pair) and pEGFP-Tub-26TAG (containing EGFP-fused  $\alpha$ -tubulin with C-terminal FLAG tag and stop codon TAG at 26) and cultured in the presence or absence of 0.5 mM **CoK**. The cells were harvested and analyzed by Western blotting for the detection of HA-tagged CoKRS and FLAG-tagged EGFP- $\alpha$ -tubulin using anti-HA antibody and anti-FLAG antibody, respectively. HEK293T cells transfected with pTubwt (carrying  $\alpha$ -tubulin wild type) was used as a control. Western blot analysis clearly indicates that EGFP- $\alpha$ -tubulin-26TAG can be expressed only in the presence of **CoK** and an orthogonal tRNA<sup>Pyl</sup>/CoKRS pair, demonstrating that genetic incorporation of **CoK** into a specific position of  $\alpha$ -tubulin using an orthogonal tRNA<sup>Pyl</sup>/CoKRS pair.



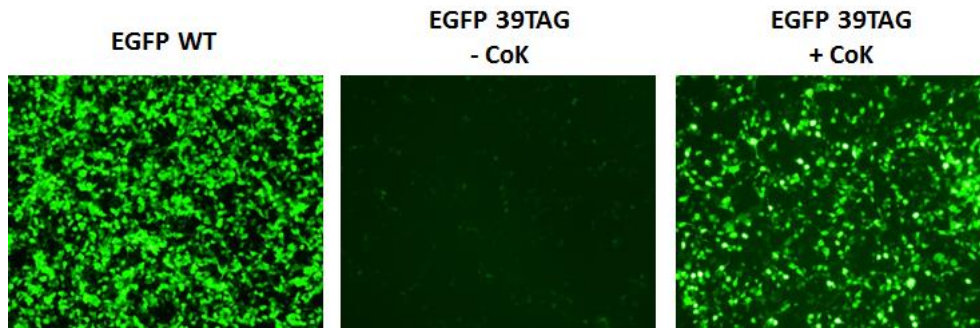

**Supplementary Figure 20 Site-specific incorporation of CoK using an orthogonal tRNA<sup>Pyl</sup>/CoKRS pair.**

HEK293T cells were transfected with pCokRS-tRNA (containing tRNA<sup>Pyl</sup>/CoKRS pair) and pEGFP-39TAG (containing EGFP with stop codon TAG at 26) and cultured in the presence or absence of 0.5 mM **CoK**. Expression of EGFP was analyzed using fluorescence microscopy. HEK293T cells transfected with pEGFP (carrying EGFP wild type) was used as a control. Fluorescence images clearly show that EGFP-39TAG can be expressed only in the presence of **CoK**, demonstrating genetic incorporation of **CoK** into a specific position of EGFP using an orthogonal tRNA<sup>Pyl</sup>/CoKRS pair.

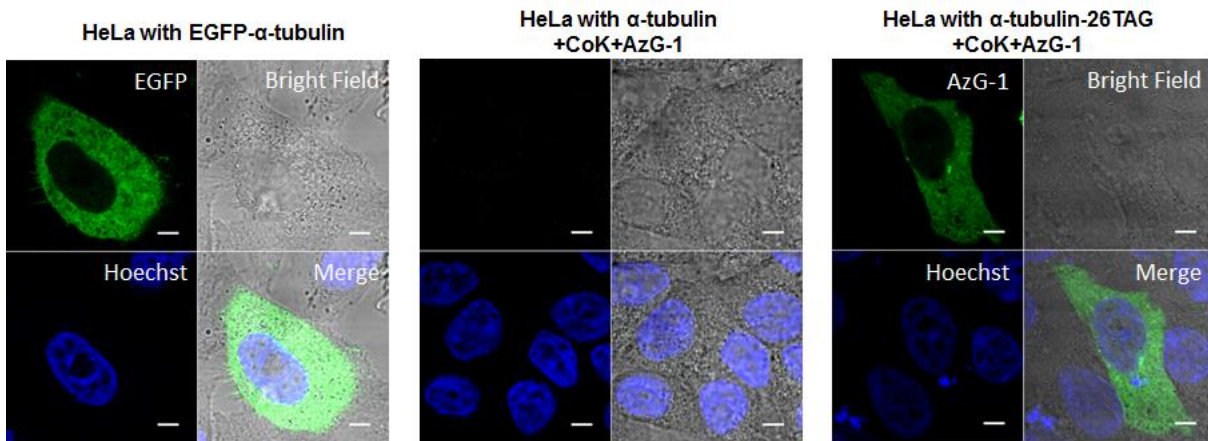

**Supplementary Figure 21 Fluorescence imaging of  $\alpha$ -tubulin in live HeLa.**

HeLa cells were co-transfected with plasmids pCoKRS-tRNA and pTub-26TAG or plasmid pTubwt followed by sequential treatment with **CoK** and **AzG-1** as described above. Live cell images clearly show that the dye **AzG-1** is conjugated specifically with **CoK**-bearing  $\alpha$ -tubulin in HeLa cells. Scale bar, 10  $\mu$ m.

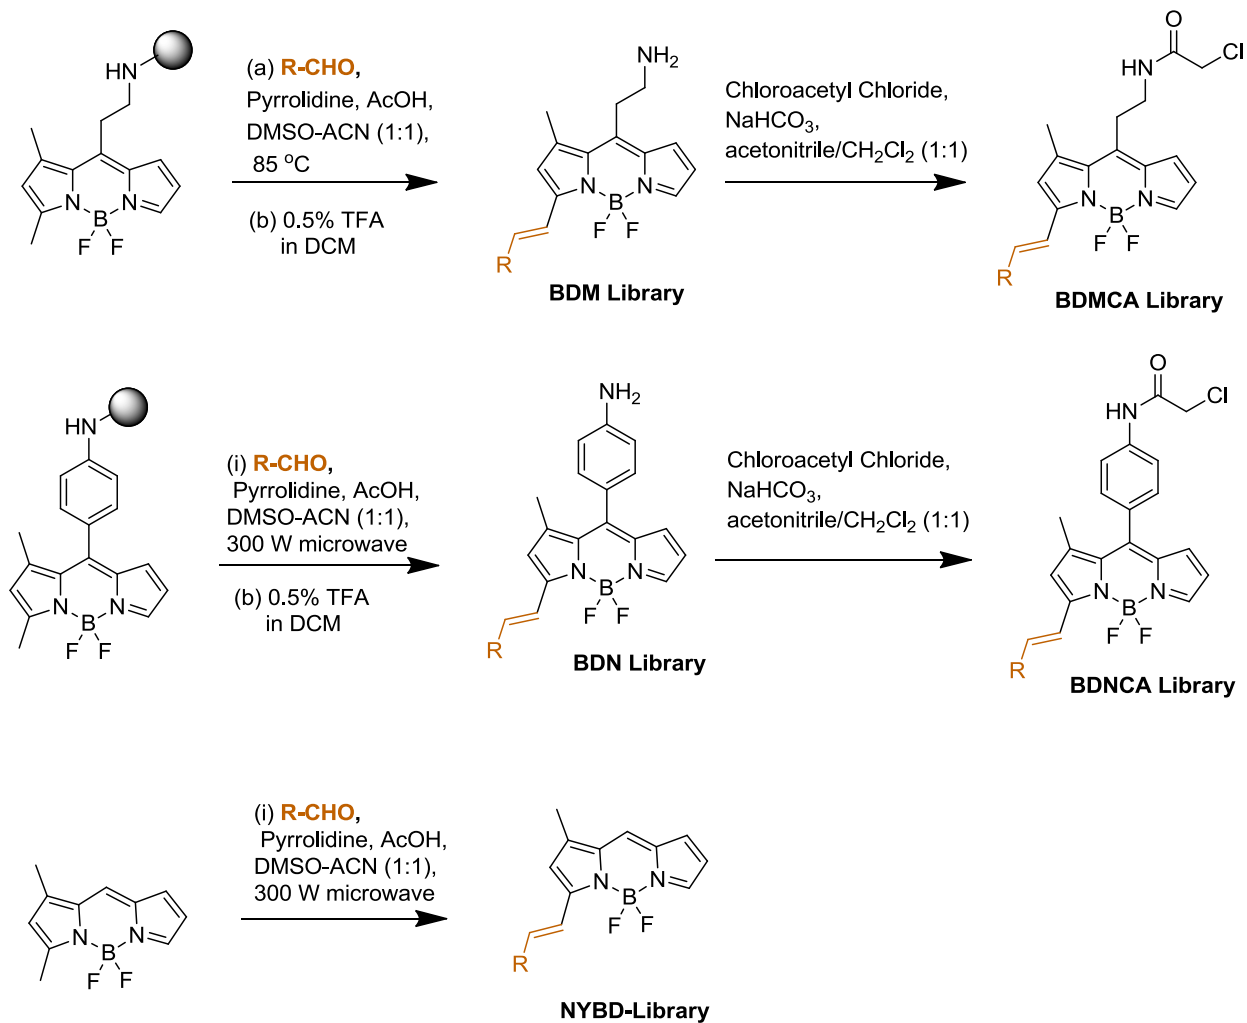

**R-CHO** = Aldehyde building blocks

(Reported detailed synthetic scheme: BDM<sup>6</sup>, BDN<sup>8</sup> and NYBD<sup>9,10</sup>)

**Supplementary Figure 22 General synthetic scheme of the BDMCA, BDNCA and NYBD libraries.**

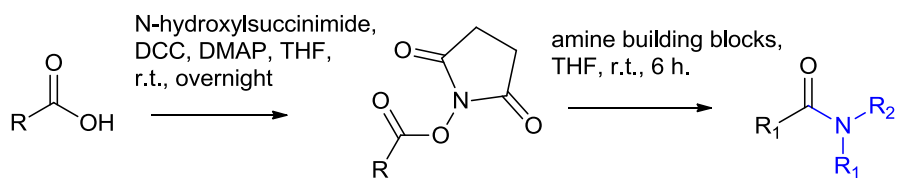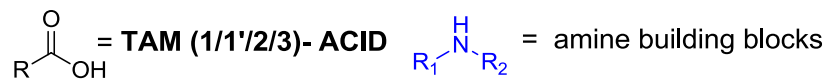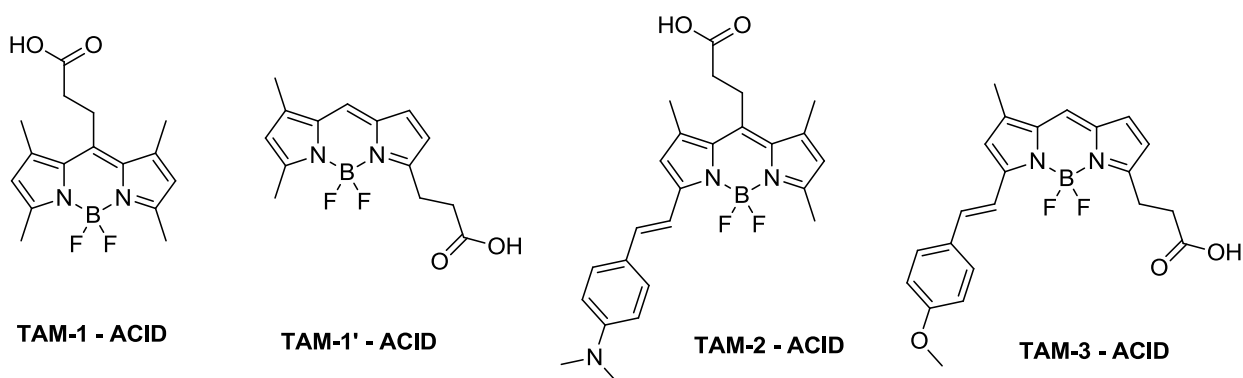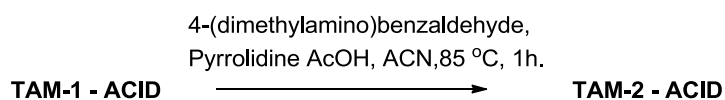

**Supplementary Figure 23 General synthetic scheme of the TAM-1, TAM-1', TAM-2 and TAM-3 libraries.**

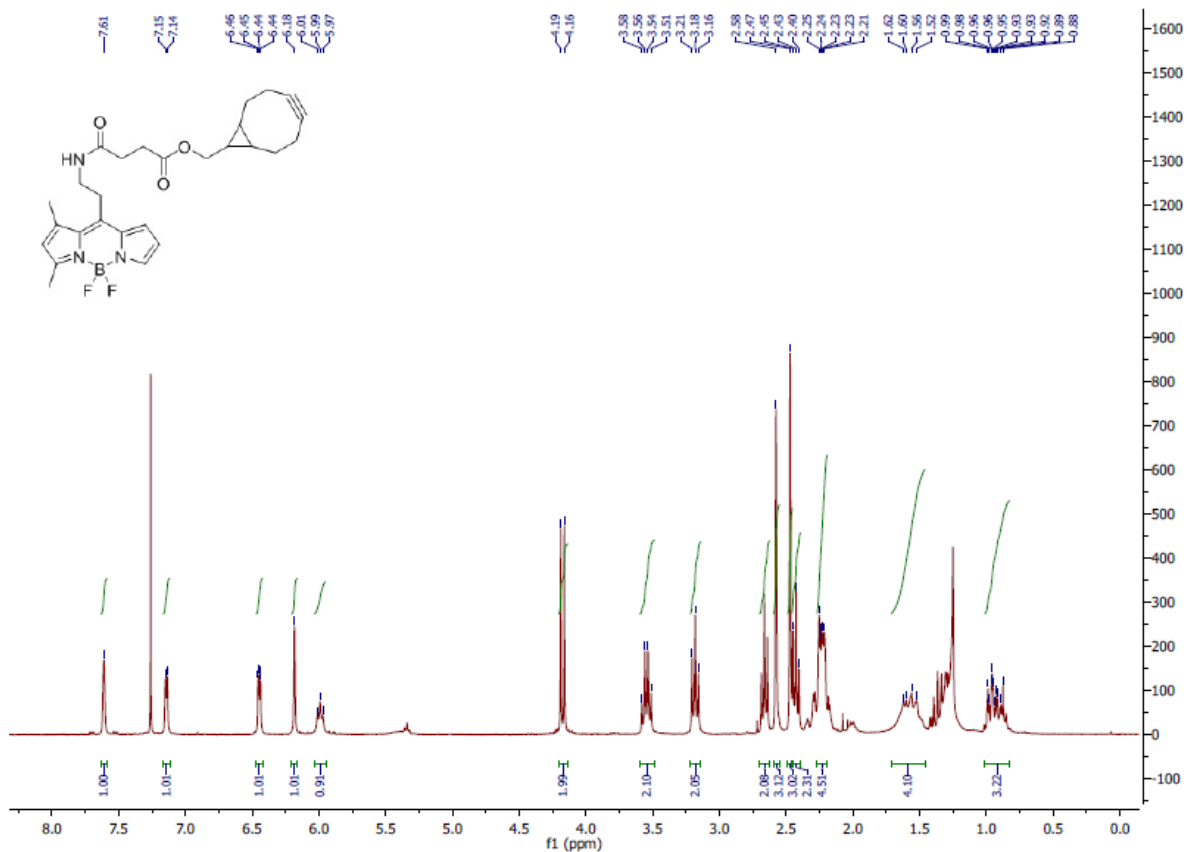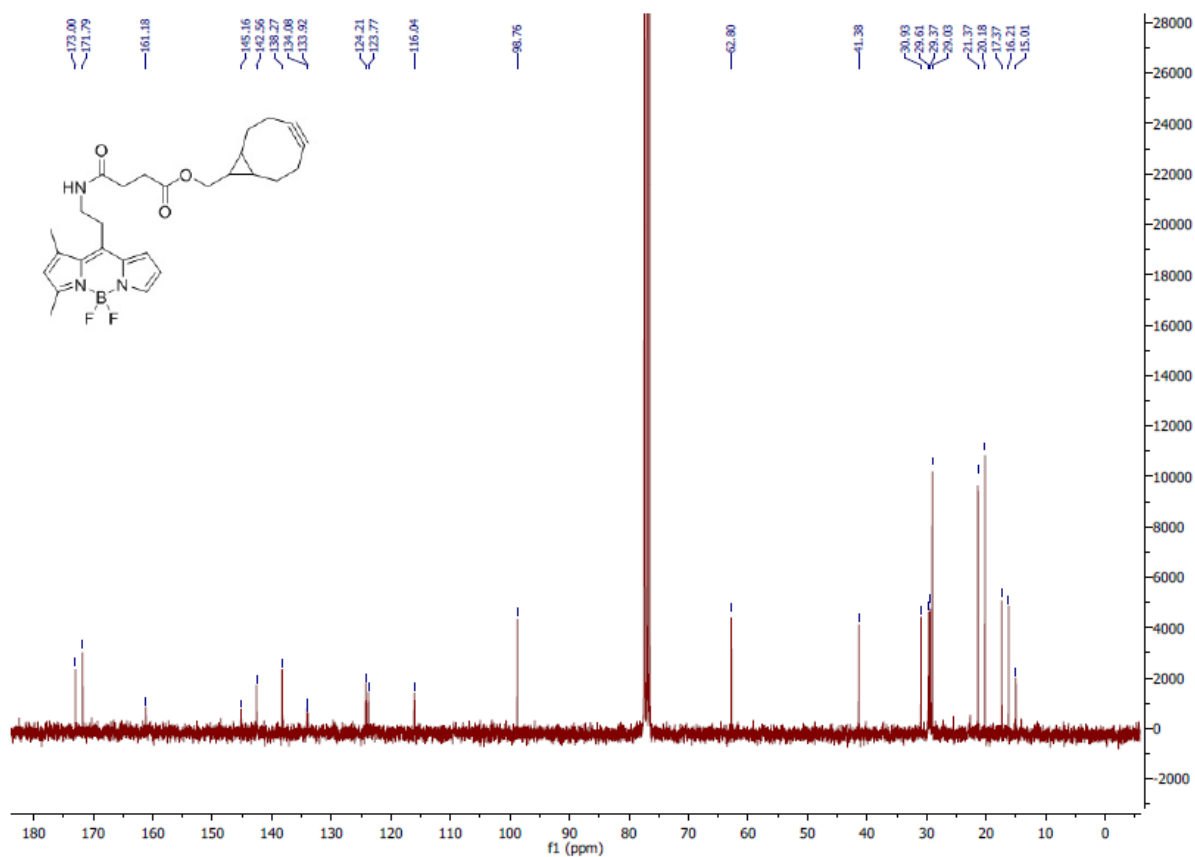

Supplementary Figure 24 <sup>1</sup>H (top) and <sup>13</sup>C (bottom) NMR spectra for CO-1.

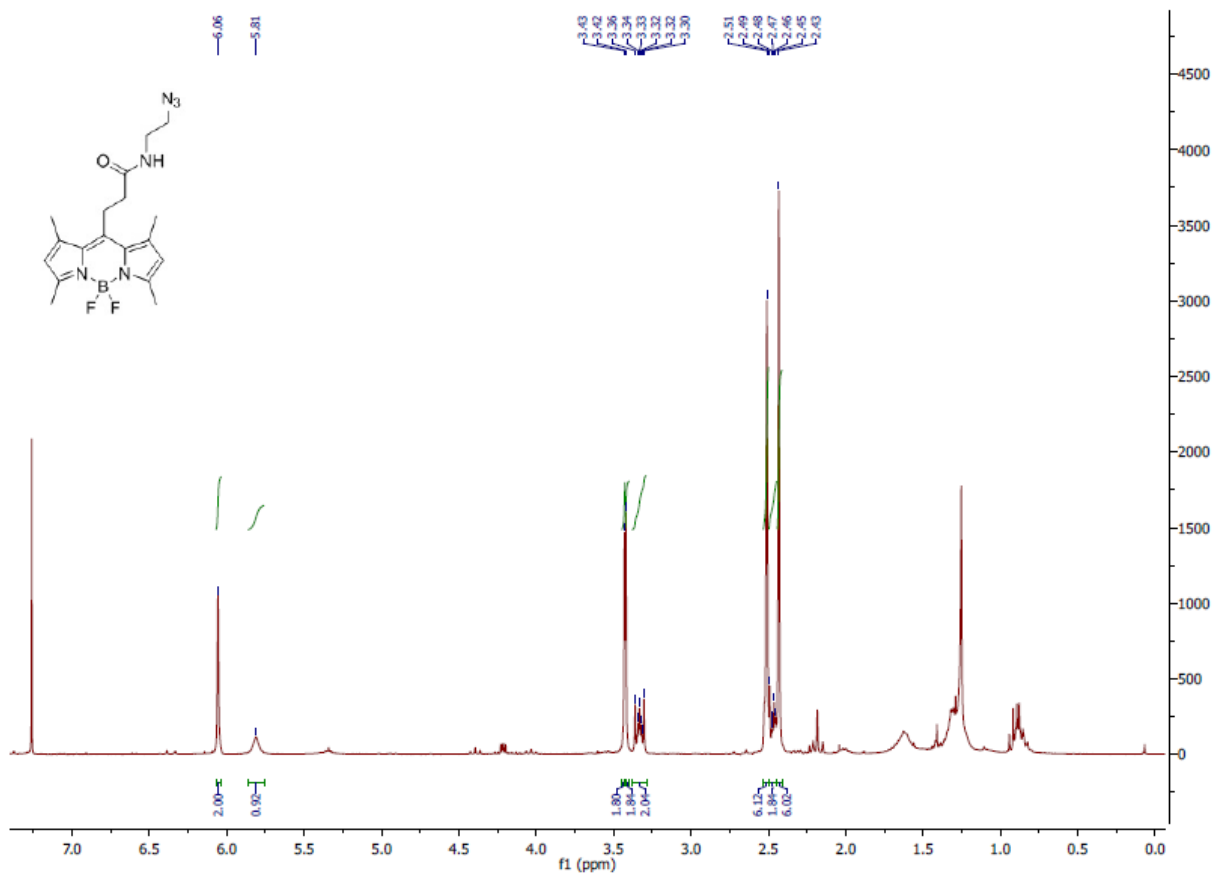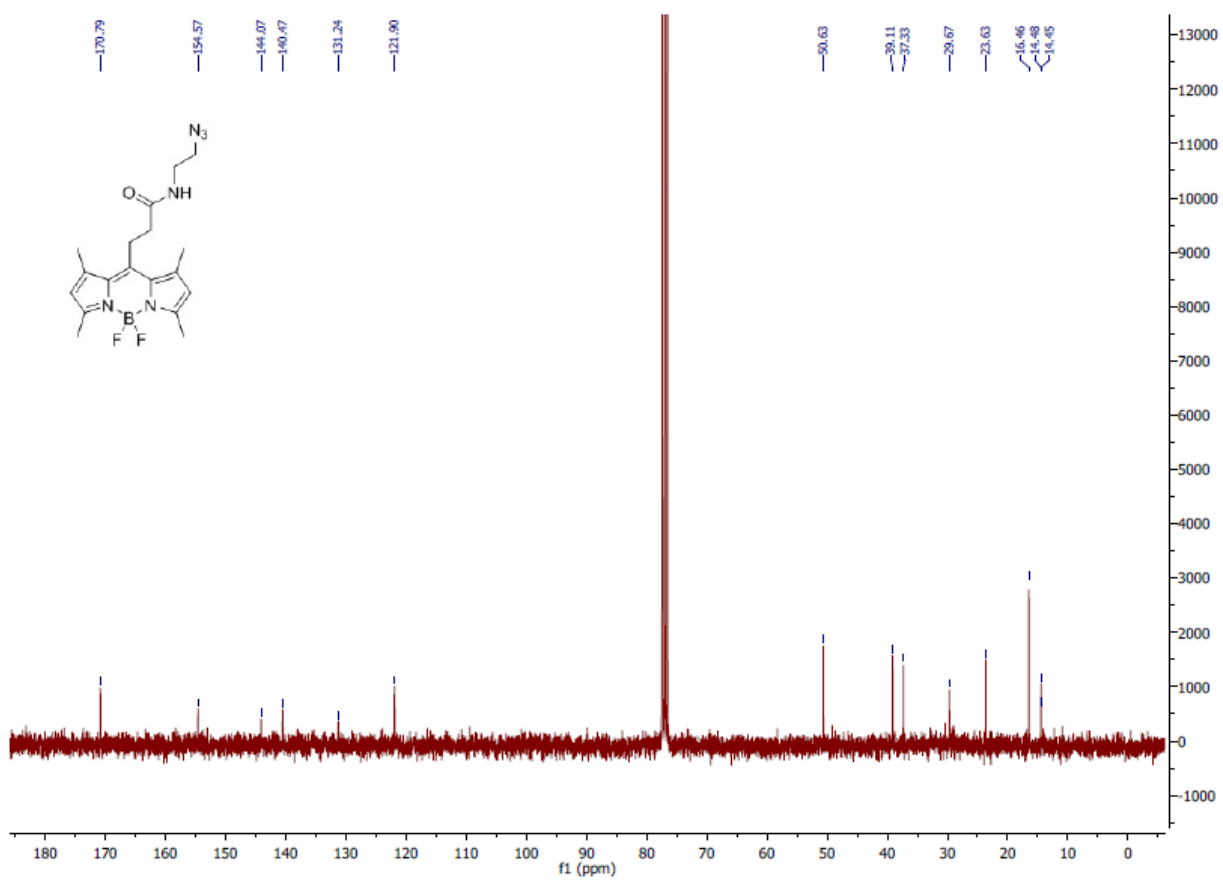

Supplementary Figure 25 <sup>1</sup>H (top) and <sup>13</sup>C (bottom) NMR spectra for AzG-1.

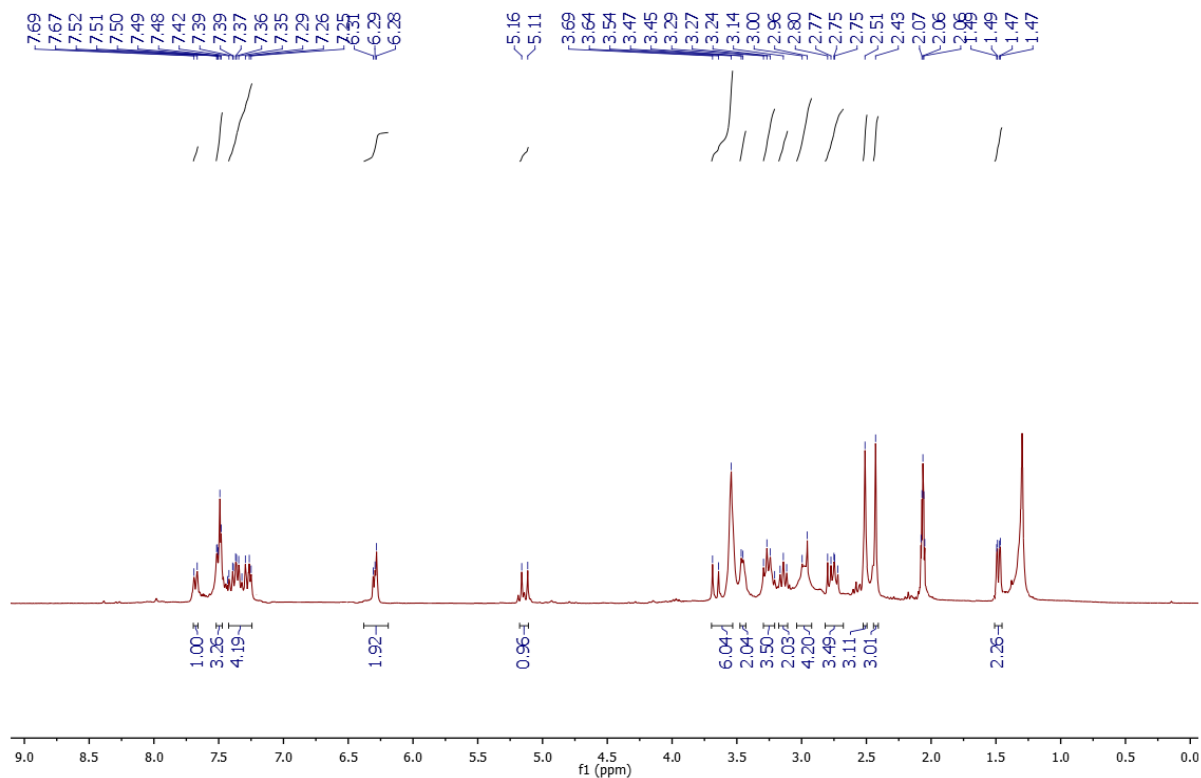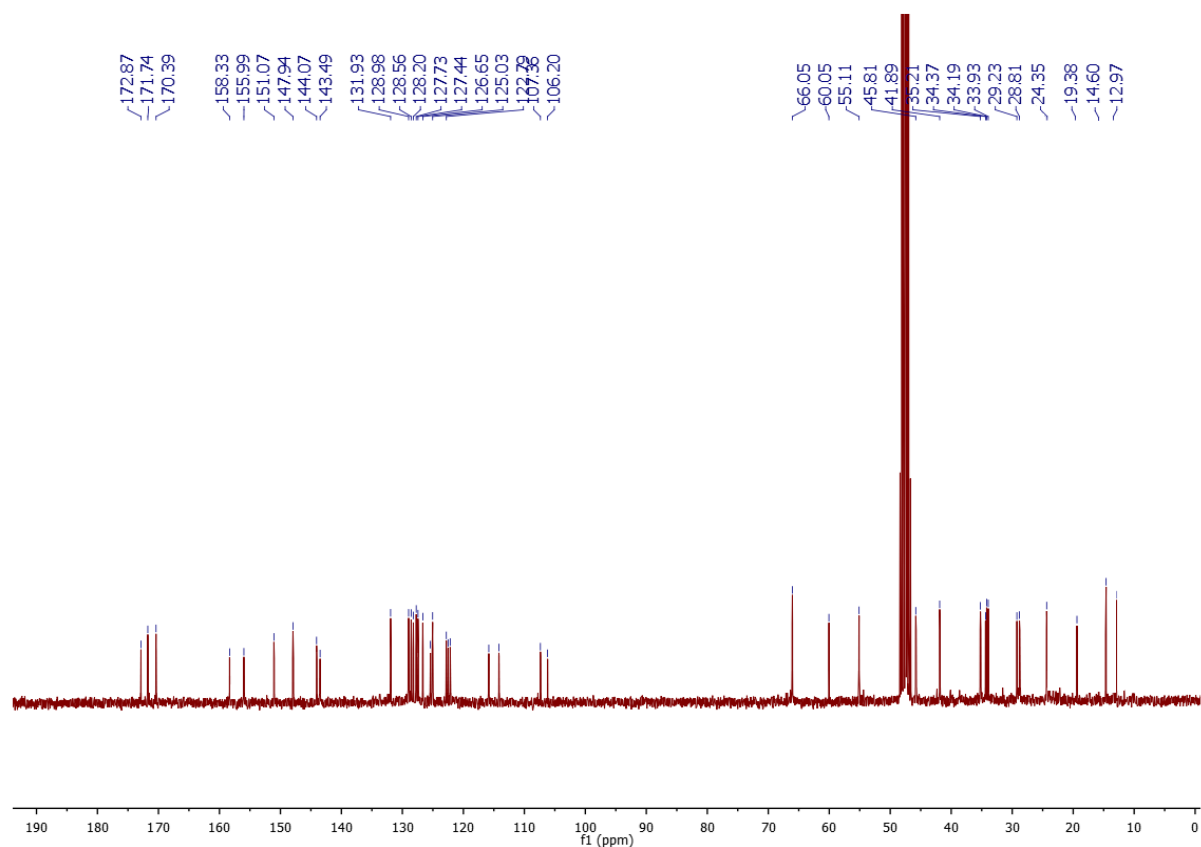

Supplementary Figure 26 <sup>1</sup>H (top) and <sup>13</sup>C (bottom) NMR spectra for CO-1H.

**Supplementary Table 1 List of representative molecular descriptors generated by MOE software**

| Type                                           | Descriptors                                                                                                                                                                                                                                                                                                                                                                                                                                                                                                                                                                    |
|------------------------------------------------|--------------------------------------------------------------------------------------------------------------------------------------------------------------------------------------------------------------------------------------------------------------------------------------------------------------------------------------------------------------------------------------------------------------------------------------------------------------------------------------------------------------------------------------------------------------------------------|
| Atom counts and bond counts                    | a_aro, a_count, a_heavy, a_IC, a_ICM, a_nB, a_nBr, a_nC, a_nCl, a_nF, a_nH, a_nI, a_nN, a_nO, a_nP, a_nS, b_1rotN, b_1rotR, b_ar, b_count, b_double, b_heavy, b_rotN, b_rotR, b_single, b_triple, chiral, chiral_u, lip_acc, lip_don, rings, VAdjEq, VAdjMa                                                                                                                                                                                                                                                                                                                    |
| Physical properties                            | apol, bpol, density, FCharge, logP(o/w), logS, mr, SlogP, SMR, TPSA, vdw_area, vdw_vol, Weight                                                                                                                                                                                                                                                                                                                                                                                                                                                                                 |
| Subdivided surface areas                       | SlogP_VSA0, SlogP_VSA1, SlogP_VSA2, SlogP_VSA3, SlogP_VSA4, SlogP_VSA5, SlogP_VSA6, SlogP_VSA7, SlogP_VSA8, SlogP_VSA9, SMR_VSA0, SMR_VSA1, SMR_VSA2, SMR_VSA3, SMR_VSA4, SMR_VSA5, SMR_VSA6, SMR_VSA7                                                                                                                                                                                                                                                                                                                                                                         |
| Pharmacophore feature descriptors              | a_acc, a_acid, a_base, a_don, a_hyd, vsa_acc, vsa_acid, vsa_base, vsa_don, vsa_hyd, vsa_other, vsa_pol                                                                                                                                                                                                                                                                                                                                                                                                                                                                         |
| Kier&Hall connectivity and kappa shape indices | chi0, chi0_C, chi0v, chi0v_C, chi1, chi1_C, chi1v, chi1v_C, Kier1, Kier2, Kier3, KierA1, KierA2, KierA3, KierFlex, zagreb                                                                                                                                                                                                                                                                                                                                                                                                                                                      |
| Partial charge descriptors                     | PEOE_PC+, PEOE_PC-, PEOE_RPC+, PEOE_RPC-, PEOE_VSA+0, PEOE_VSA+1, PEOE_VSA+2, PEOE_VSA+3, PEOE_VSA+4, PEOE_VSA+5, PEOE_VSA+6, PEOE_VSA-0, PEOE_VSA-1, PEOE_VSA-2, PEOE_VSA-3, PEOE_VSA-4, PEOE_VSA-5, PEOE_VSA-6, PEOE_VSA_FHYD, PEOE_VSA_FNEG, PEOE_VSA_FPNEG, PEOE_VSA_FPOL, PEOE_VSA_FPOS, PEOE_VSA_FPPOS, PEOE_VSA_HYD, PEOE_VSA_NEG, PEOE_VSA_PNEG, PEOE_VSA_POL, PEOE_VSA_POS, PEOE_VSA_PPOS, Q_PC+, Q_PC-, Q_RPC+, Q_RPC-, Q_VSA_FHYD, Q_VSA_FNEG, Q_VSA_FPNEG, Q_VSA_FPOL, Q_VSA_FPOS, Q_VSA_FPPOS, Q_VSA_HYD, Q_VSA_NEG, Q_VSA_PNEG, Q_VSA_POL, Q_VSA_POS, Q_VSA_PPOS |



**Supplementary Table 2 Thirty-nine molecular descriptors selected for feature selection**

| No | Descriptor | Description                                                                                                                                                                                                                         | Class*          |
|----|------------|-------------------------------------------------------------------------------------------------------------------------------------------------------------------------------------------------------------------------------------|-----------------|
| 1  | diameter   | Largest value in the distance matrix                                                                                                                                                                                                | 2D <sup>1</sup> |
| 2  | b_double   | Number of double bonds. Aromatic bonds are not considered to be double bonds                                                                                                                                                        | 2D              |
| 3  | b_rotR     | Fraction of rotatable bonds                                                                                                                                                                                                         | 2D              |
| 4  | Weight     | Molecular weight                                                                                                                                                                                                                    | 2D              |
| 5  | a_nN       | Number of nitrogen atoms                                                                                                                                                                                                            | 2D              |
| 6  | a_nO       | Number of oxygen atoms                                                                                                                                                                                                              | 2D              |
| 7  | Q_VSA_FHYD | Fractional hydrophobic van der Waals surface area                                                                                                                                                                                   | 2D              |
| 8  | Q_VSA_FNEG | Fractional negative van der Waals surface area                                                                                                                                                                                      | 2D              |
| 9  | Q_VSA_FPOL | Fractional polar van der Waals surface area                                                                                                                                                                                         | 2D              |
| 10 | Q_VSA_NEG  | Total negative van der Waals surface area                                                                                                                                                                                           | 2D              |
| 11 | Q_VSA_POL  | Total polar van der Waals surface area                                                                                                                                                                                              | 2D              |
| 12 | Q_VSA_POS  | Total positive van der Waals surface area                                                                                                                                                                                           | 2D              |
| 13 | lip_acc    | The number of hydrogen bond acceptor atoms (O and N atoms)                                                                                                                                                                          | 2D              |
| 14 | lip_don    | The number of hydrogen bond donor (OH and NH atoms)                                                                                                                                                                                 | 2D              |
| 15 | KierFlex   | Kier molecular flexibility index                                                                                                                                                                                                    | 2D <sup>2</sup> |
| 16 | logS       | Log of the solubility in water                                                                                                                                                                                                      | 2D <sup>3</sup> |
| 17 | dipole     | Dipole moment calculated from the partial charges of the molecule                                                                                                                                                                   | 3D              |
| 18 | a_acc      | Number of hydrogen bond acceptor atoms (not counting acidic atoms but counting atoms that are both hydrogen bond donors and acceptors such as -OH)                                                                                  | 2D              |
| 19 | a_don      | Number of hydrogen bond donor atoms (not counting basic atoms but counting atoms that are both hydrogen bond donors and acceptors such as -OH)                                                                                      | 2D              |
| 20 | vsa_acc    | Approximation to the sum of VDW surface areas of pure hydrogen bond acceptors (not counting acidic atoms and atoms that are both hydrogen bond donors and acceptors such as -OH)                                                    | 2D              |
| 21 | vsa_don    | Approximation to the sum of VDW surface areas of pure hydrogen bond donors (not counting basic atoms and atoms that are both hydrogen bond donors and acceptors such as -OH)                                                        | 2D              |
| 22 | vsa_pol    | Approximation to the sum of VDW surface areas of polar (both hydrogen bond donors and acceptors) atoms (such as -OH)                                                                                                                | 2D              |
| 23 | SlogP      | Log of the octanol/water partition coefficient (including implicit hydrogens). This property is an atomic contribution model that calculates logP from the given structure; i.e., the correct protonation state (washed structures) | 2D <sup>4</sup> |
| 24 | ASA_A      | Water accessible surface area of all atoms with negative partial charge                                                                                                                                                             | 3D              |
| 25 | ASA_H      | Water accessible surface area of all hydrophobic atoms                                                                                                                                                                              | 3D              |
| 26 | ASA_P      | Water accessible surface area of all polar atoms                                                                                                                                                                                    | 3D              |
| 27 | DASA       | Absolute value of the difference between water accessible surface area of all atoms with negative and positive partial charge                                                                                                       | 3D              |

|    |         |                                                                                                                    |                 |
|----|---------|--------------------------------------------------------------------------------------------------------------------|-----------------|
| 28 | DCASA   | Absolute value of the difference between negative and positive charge weighted surface area                        | 3D              |
| 29 | FASA_A  | Fractional of water accessible surface area of all atoms with negative partial charge                              | 3D              |
| 30 | FASA    | Fractional of water accessible surface area of all atoms with positive partial charge                              | 3D              |
| 31 | FASA_H  | Fractional of water accessible surface area of all hydrophobic atoms                                               | 3D              |
| 32 | FASA_P  | Fractional of water accessible surface area of all polar atoms                                                     | 3D              |
| 33 | FCASA_A | Fractional of negative charge weighted surface area                                                                | 3D              |
| 34 | FCASA   | Fractional of positive charge weighted surface area                                                                | 3D              |
| 35 | VSA     | van der Waals surface area. A polyhedral representation is used for each atom in calculating the surface area      | 3D              |
| 36 | TPSA    | Topological polar surface area                                                                                     | 3D <sup>5</sup> |
| 37 | dens    | Molecular mass density                                                                                             | 3D              |
| 38 | glob    | Globularity. A value of 1 indicates a perfect sphere while a value of 0 indicates a two- or one-dimensional object | 3D              |
| 39 | logPow  | Log of the octanol/water partition coefficient                                                                     | 2D              |

\*2D: two-dimensional molecular descriptors, 3D: three-dimensional molecular descriptors

**Supplementary Table 3 Results of Shapiro-Wilk normality test**

| Descriptor | Phenotype | Shapiro-Wilk |         |       | Descriptor | Phenotype | Shapiro-Wilk |         |       |
|------------|-----------|--------------|---------|-------|------------|-----------|--------------|---------|-------|
|            |           | Statistic    | df      | Sig.  |            |           | Statistic    | df      | Sig.  |
| diameter   | N-group   | 0.864        | 127.000 | 0.000 | vsa_acc    | N-group   | 0.765        | 127.000 | 0.000 |
|            | L-group   | 0.951        | 24.000  | 0.289 |            | L-group   | 0.624        | 24.000  | 0.000 |
|            | H-group   | 0.967        | 654.000 | 0.000 |            | H-group   | 0.863        | 654.000 | 0.000 |
| b_double   | N-group   | 0.702        | 127.000 | 0.000 | vsa_don    | N-group   | 0.618        | 127.000 | 0.000 |
|            | L-group   | 0.503        | 24.000  | 0.000 |            | L-group   | 0.618        | 24.000  | 0.000 |
|            | H-group   | 0.721        | 654.000 | 0.000 |            | H-group   | 0.649        | 654.000 | 0.000 |
| b_rotR     | N-group   | 0.807        | 127.000 | 0.000 | vsa_pol    | N-group   | 0.912        | 127.000 | 0.000 |
|            | L-group   | 0.976        | 24.000  | 0.804 |            | L-group   | 0.809        | 24.000  | 0.000 |
|            | H-group   | 0.962        | 654.000 | 0.000 |            | H-group   | 0.895        | 654.000 | 0.000 |
| Weight     | N-group   | 0.897        | 127.000 | 0.000 | SlogP      | N-group   | 0.875        | 127.000 | 0.000 |
|            | L-group   | 0.984        | 24.000  | 0.955 |            | L-group   | 0.977        | 24.000  | 0.837 |
|            | H-group   | 0.963        | 654.000 | 0.000 |            | H-group   | 0.982        | 654.000 | 0.000 |
| a_nN       | N-group   | 0.808        | 127.000 | 0.000 | ASA_A      | N-group   | 0.987        | 127.000 | 0.289 |
|            | L-group   | 0.771        | 24.000  | 0.000 |            | L-group   | 0.838        | 24.000  | 0.001 |
|            | H-group   | 0.772        | 654.000 | 0.000 |            | H-group   | 0.996        | 654.000 | 0.081 |
| a_nO       | N-group   | 0.893        | 127.000 | 0.000 | ASA_H      | N-group   | 0.760        | 127.000 | 0.000 |
|            | L-group   | 0.760        | 24.000  | 0.000 |            | L-group   | 0.948        | 24.000  | 0.240 |
|            | H-group   | 0.908        | 654.000 | 0.000 |            | H-group   | 0.944        | 654.000 | 0.000 |
| Q_VSA_FHYD | N-group   | 0.967        | 127.000 | 0.003 | ASA_P      | N-group   | 0.939        | 127.000 | 0.000 |
|            | L-group   | 0.973        | 24.000  | 0.743 |            | L-group   | 0.955        | 24.000  | 0.352 |
|            | H-group   | 0.958        | 654.000 | 0.000 |            | H-group   | 0.945        | 654.000 | 0.000 |
| Q_VSA_FNEG | N-group   | 0.895        | 127.000 | 0.000 | DASA       | N-group   | 0.900        | 127.000 | 0.000 |
|            | L-group   | 0.862        | 24.000  | 0.004 |            | L-group   | 0.967        | 24.000  | 0.583 |
|            | H-group   | 0.954        | 654.000 | 0.000 |            | H-group   | 0.910        | 654.000 | 0.000 |
| Q_VSA_FPOL | N-group   | 0.967        | 127.000 | 0.003 | DCASA      | N-group   | 0.818        | 127.000 | 0.000 |
|            | L-group   | 0.973        | 24.000  | 0.743 |            | L-group   | 0.955        | 24.000  | 0.346 |
|            | H-group   | 0.958        | 654.000 | 0.000 |            | H-group   | 0.828        | 654.000 | 0.000 |
| Q_VSA_NEG  | N-group   | 0.983        | 127.000 | 0.125 | FASA_A     | N-group   | 0.952        | 127.000 | 0.000 |
|            | L-group   | 0.797        | 24.000  | 0.000 |            | L-group   | 0.944        | 24.000  | 0.195 |
|            | H-group   | 0.977        | 654.000 | 0.000 |            | H-group   | 0.989        | 654.000 | 0.000 |

|           |         |       |         |       |         |         |       |         |       |
|-----------|---------|-------|---------|-------|---------|---------|-------|---------|-------|
| Q_VSA_POL | N-group | 0.947 | 127.000 | 0.000 | FASA    | N-group | 0.958 | 127.000 | 0.001 |
|           | L-group | 0.890 | 24.000  | 0.013 |         | L-group | 0.881 | 24.000  | 0.009 |
|           | H-group | 0.942 | 654.000 | 0.000 |         | H-group | 0.974 | 654.000 | 0.000 |
| Q_VSA_POS | N-group | 0.740 | 127.000 | 0.000 | FASA_H  | N-group | 0.961 | 127.000 | 0.001 |
|           | L-group | 0.972 | 24.000  | 0.721 |         | L-group | 0.976 | 24.000  | 0.812 |
|           | H-group | 0.929 | 654.000 | 0.000 |         | H-group | 0.965 | 654.000 | 0.000 |
| lip_acc   | N-group | 0.932 | 127.000 | 0.000 | FASA_P  | N-group | 0.961 | 127.000 | 0.001 |
|           | L-group | 0.777 | 24.000  | 0.000 |         | L-group | 0.976 | 24.000  | 0.812 |
|           | H-group | 0.943 | 654.000 | 0.000 |         | H-group | 0.965 | 654.000 | 0.000 |
| lip_don   | N-group | 0.805 | 127.000 | 0.000 | FCASA_A | N-group | 0.989 | 127.000 | 0.375 |
|           | L-group | 0.846 | 24.000  | 0.002 |         | L-group | 0.916 | 24.000  | 0.047 |
|           | H-group | 0.772 | 654.000 | 0.000 |         | H-group | 0.994 | 654.000 | 0.007 |
| KierFlex  | N-group | 0.680 | 127.000 | 0.000 | FCASA   | N-group | 0.991 | 127.000 | 0.624 |
|           | L-group | 0.913 | 24.000  | 0.042 |         | L-group | 0.866 | 24.000  | 0.004 |
|           | H-group | 0.962 | 654.000 | 0.000 |         | H-group | 0.993 | 654.000 | 0.002 |
| logS      | N-group | 0.864 | 127.000 | 0.000 | VSA     | N-group | 0.794 | 127.000 | 0.000 |
|           | L-group | 0.917 | 24.000  | 0.050 |         | L-group | 0.989 | 24.000  | 0.994 |
|           | H-group | 0.972 | 654.000 | 0.000 |         | H-group | 0.967 | 654.000 | 0.000 |
| dipole    | N-group | 0.462 | 127.000 | 0.000 | TPSA    | N-group | 0.949 | 127.000 | 0.000 |
|           | L-group | 0.898 | 24.000  | 0.020 |         | L-group | 0.849 | 24.000  | 0.002 |
|           | H-group | 0.363 | 654.000 | 0.000 |         | H-group | 0.959 | 654.000 | 0.000 |
| a_acc     | N-group | 0.874 | 127.000 | 0.000 | dens    | N-group | 0.896 | 127.000 | 0.000 |
|           | L-group | 0.659 | 24.000  | 0.000 |         | L-group | 0.895 | 24.000  | 0.017 |
|           | H-group | 0.897 | 654.000 | 0.000 |         | H-group | 0.955 | 654.000 | 0.000 |
| a_don     | N-group | 0.794 | 127.000 | 0.000 | glob    | N-group | 0.764 | 127.000 | 0.000 |
|           | L-group | 0.722 | 24.000  | 0.000 |         | L-group | 0.788 | 24.000  | 0.000 |
|           | H-group | 0.741 | 654.000 | 0.000 |         | H-group | 0.722 | 654.000 | 0.000 |
|           |         |       |         |       | logPow  | N-group | 0.873 | 127.000 | 0.000 |
|           |         |       |         |       |         | L-group | 0.962 | 24.000  | 0.484 |
|           |         |       |         |       |         | H-group | 0.991 | 654.000 | 0.000 |

## Supplementary Table 4 Results of Kruskal-Wallis test

Test Statistics(a,b)

| Descriptor  | diameter | b_double | b_rotR | Weight | a_nN   | a_nO  | Q_VSA_FHYD | Q_VSA_FNEG |
|-------------|----------|----------|--------|--------|--------|-------|------------|------------|
| Chi-Square  | 55.111   | 44.237   | 14.967 | 69.175 | 27.021 | 8.321 | 10.818     | 88.823     |
| df          | 2.000    | 2.000    | 2.000  | 2.000  | 2.000  | 2.000 | 2.000      | 2.000      |
| Asymp. Sig. | 0.000    | 0.000    | 0.001  | 0.000  | 0.000  | 0.016 | 0.004      | 0.000      |

| Descriptor  | Q_VSA_FPOL | Q_VSA_NEG | Q_VSA_POL | Q_VSA_POS | lip_acc | lip_don | KierFlex | logS    |
|-------------|------------|-----------|-----------|-----------|---------|---------|----------|---------|
| Chi-Square  | 10.818     | 85.882    | 22.254    | 33.091    | 6.030   | 16.751  | 46.444   | 110.411 |
| df          | 2.000      | 2.000     | 2.000     | 2.000     | 2.000   | 2.000   | 2.000    | 2.000   |
| Asymp. Sig. | 0.004      | 0.000     | 0.000     | 0.000     | 0.049   | 0.000   | 0.000    | 0.000   |

| Descriptor  | dipole | a_acc | a_don | vsa_acc | vsa_don | vsa_pol | SlogP   | ASA_A  |
|-------------|--------|-------|-------|---------|---------|---------|---------|--------|
| Chi-Square  | 20.277 | 9.987 | 2.466 | 20.238  | 47.116  | 3.093   | 102.268 | 77.188 |
| df          | 2.000  | 2.000 | 2.000 | 2.000   | 2.000   | 2.000   | 2.000   | 2.000  |
| Asymp. Sig. | 0.000  | 0.007 | 0.291 | 0.000   | 0.000   | 0.213   | 0.000   | 0.000  |

| Descriptor  | ASA_H  | ASA_P  | DASA  | DCASA | FASA_A | FASA   | FASA_H | FASA_P |
|-------------|--------|--------|-------|-------|--------|--------|--------|--------|
| Chi-Square  | 50.183 | 31.548 | 2.552 | 5.361 | 15.877 | 38.018 | 7.662  | 7.662  |
| df          | 2.000  | 2.000  | 2.000 | 2.000 | 2.000  | 2.000  | 2.000  | 2.000  |
| Asymp. Sig. | 0.000  | 0.000  | 0.279 | 0.069 | 0.000  | 0.000  | 0.022  | 0.022  |

| Descriptor  | FCASA_A | FCASA  | VSA    | TPSA  | dens   | glob  | logPow |
|-------------|---------|--------|--------|-------|--------|-------|--------|
| Chi-Square  | 13.926  | 56.337 | 58.816 | 0.443 | 27.614 | 9.172 | 94.733 |
| df          | 2.000   | 2.000  | 2.000  | 2.000 | 2.000  | 2.000 | 2.000  |
| Asymp. Sig. | 0.001   | 0.000  | 0.000  | 0.801 | 0.000  | 0.010 | 0.000  |

a Kruskal Wallis Test. Variables were considered to have a statistically significant difference if  $p < 0.01$

b Grouping Variable: Group

**Supplementary Table 5 Contribution of each principal component to variance**

|               | PC1    | PC2    | PC3    | PC4    | PC5     |
|---------------|--------|--------|--------|--------|---------|
| % of variance | 72.367 | 19.845 | 5.833  | 1.044  | 0.910   |
| Cumulative %  | 72.367 | 92.213 | 98.046 | 99.090 | 100.000 |

Extraction Method: Principal Component Analysis.

**Supplementary Table 6 Phenotypic group classification of nine selected EP probes**

| <b>Name</b>   | <b>FNEG</b> | <b>logS</b> | <b>SlogP</b> | <b>Predicted group</b> | <b>Experimentally observed group</b> |
|---------------|-------------|-------------|--------------|------------------------|--------------------------------------|
| <b>CS-2</b>   | 0.338       | -3.780      | 3.416        | L-group                | L-group                              |
| <b>CS-3</b>   | 0.284       | -4.150      | 3.588        | L-group                | L-group                              |
| <b>CS-8</b>   | 0.300       | -3.092      | 2.898        | L-group                | L-group                              |
| <b>CS-11</b>  | 0.344       | -2.649      | 2.391        | L-group                | L-group                              |
| <b>CS-13</b>  | 0.277       | -2.483      | 1.412        | L-group                | L-group                              |
| <b>CS-14</b>  | 0.250       | -2.626      | 1.428        | L-group                | N-group                              |
| <b>CS-42</b>  | 0.276       | -2.442      | 1.650        | L-group                | L-group                              |
| <b>CS-56</b>  | 0.265       | -3.416      | 2.931        | L-group                | L-group                              |
| <b>CS-101</b> | 0.339       | -2.757      | 2.434        | L-group                | L-group                              |

**Supplementary Table 7 Decision logic table illustrating the effect of molecular descriptors on cell permeability and degree of nonspecific binding of the probes**

| <b>SlogP</b>           | <b>Q_VSA_FNEG</b> | <b>logS</b>            | <b>Prediction</b> | <b>Remark</b>                                                    |
|------------------------|-------------------|------------------------|-------------------|------------------------------------------------------------------|
| 1 to 4                 | 0.15 to 0.35      | -6 to -2               | L-group           |                                                                  |
|                        | 0.15 to 0.35      | < -6                   | Grey-group*       | If logS close to -6 tend to be in L-group                        |
|                        | > 0.35            | -6 to -2 or < -6       | Grey group*       | If Q_VSA_FNEG > 0.53 tend to be in N-group, otherwise in H-group |
| > 4                    | > 0.35            | -6 to -2               | H-group           |                                                                  |
|                        | 0.15 to 0.35      | < -6                   | H-group           | Tend to be in grey group                                         |
|                        | > 0.35            | < -6                   | H-group           | Slight possibility to be in grey group                           |
| > 12<br>(Extreme high) | any range         | < -12<br>(Extreme low) | N-group           |                                                                  |
| < 1<br>(Extreme low)   | any range         | > -2<br>(Extreme high) | N-group           |                                                                  |

\*Grey group is a group where all the three possible cellular behaviors might be found.



**Supplementary Table 8 Molecular descriptor values, predicted phenotypic group and observed phenotypic group of BOR-1, BOR-2, BOR-1H and BOR-2H.**

| <b>Probe name</b>                  | <b>BOR-1</b> | <b>BOR-2</b> | <b>BOR-1H</b> | <b>BOR-2H</b> |
|------------------------------------|--------------|--------------|---------------|---------------|
| <b>SlogP</b>                       | 2.12         | 2.17         | 2.69          | 3.67          |
| <b>FNEG</b>                        | 0.31         | 0.32         | 0.49          | 0.42          |
| <b>LogS</b>                        | -4.37        | -4.8         | -5.61         | -6.59         |
| <b>Predicted group<sup>a</sup></b> | L-group      | L-group      | H-group       | H-group       |
| <b>Observed group<sup>b</sup></b>  | L-group      | L-group      | H-group       | H-group       |

**a:** phenotypic groups were predicted based on molecular descriptor value of the probes

**b:** phenotypic groups were observed from cellular retention and efflux experiments in U-2 OS and CHO cell lines

**Supplementary Table 9. Spectroscopic properties and purity table for CO-1 and CO-1H.**

Calculated mass, experimental mass, absorbance maximum ( $\lambda_{\text{abs}}$ ), fluorescent emission maximum ( $\lambda_{\text{em}}$ ), extinction coefficient ( $\epsilon$ ), quantum yield ( $\Phi$ ), and purity.

| Name         | mass<br>(calc)      | m/z<br>(exp)        | $\lambda_{\text{abs}}$<br>(nm) | $\lambda_{\text{em}}$<br>(nm) | $\epsilon$<br>(1/M.cm) | QY ( $\Phi$ ) <sup>b</sup> | Purity<br>(%) <sup>c</sup> |
|--------------|---------------------|---------------------|--------------------------------|-------------------------------|------------------------|----------------------------|----------------------------|
| <b>CO-1</b>  | 494.24 <sup>a</sup> | 494.24 <sup>a</sup> | 490                            | 510                           | 66668                  | 0.66                       | 98                         |
| <b>CO-1H</b> | 692.31 <sup>a</sup> | 692.31 <sup>a</sup> | 500                            | 520                           | 83333                  | 0.83                       | 98                         |

Absorbance and fluorescence emission data were recorded by a Synergy 4, Biotek Inc. fluorescent plate reader at 10  $\mu\text{M}$  concentration in DMSO in 96-well plates. HRMS *a*: found mass (M-H), *b*: tetramethyl BODIPY was used as standard, *c*: purity data was calculated on the basis of the integration in HPLC trace at 254 nm.

**Supplementary Table 10 Decoding table for BDMCA, BDNCA and NYBD,**

|                                                                                     |                                                                                     |                                                                                     |                                                                                     |                                                                                     |                                                                                     |                                                                                      |                                                                                       |
|-------------------------------------------------------------------------------------|-------------------------------------------------------------------------------------|-------------------------------------------------------------------------------------|-------------------------------------------------------------------------------------|-------------------------------------------------------------------------------------|-------------------------------------------------------------------------------------|--------------------------------------------------------------------------------------|---------------------------------------------------------------------------------------|
| 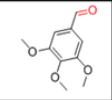   |    |    |    |    |    |    |    |
|    |    |    |    |    |    |    |    |
|    |    |    |    |    |    |    |    |
|    |    |    |    |    |    |    |    |
|    |    |    |    |    |    |    |    |
|    |    |    |    |    |    |    |    |
|   |   |   |   |   |   |   |   |
|  |  |  |  |  |  |  |  |
|  |  |  |  |  |  |  |  |
|  |  |  |  |  |  |  |  |
|  |  |  |  |  |  |  |  |
|  |  |  |  |  |  |  |  |
|  |  |  |  |  |  |  |  |
|  |  |  |  |  |  |  |  |

(Cont'd) Supplementary Table 10 Decoding table for BDMCA, BDNCA and NYBD.

|                                                                                    |                                                                                    |                                                                                    |                                                                                    |                                                                                    |                                                                                    |                                                                                     |                                                                                      |
|------------------------------------------------------------------------------------|------------------------------------------------------------------------------------|------------------------------------------------------------------------------------|------------------------------------------------------------------------------------|------------------------------------------------------------------------------------|------------------------------------------------------------------------------------|-------------------------------------------------------------------------------------|--------------------------------------------------------------------------------------|
| 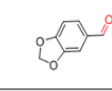  |   |   |   |   |   |   |   |
| 139                                                                                | 140                                                                                | 142                                                                                | 143                                                                                | 198                                                                                | 199                                                                                | 200                                                                                 | 202                                                                                  |
|   |   |   |   |   |   |   |   |
| 144                                                                                | 147                                                                                | 152                                                                                | 153                                                                                | 203                                                                                | 206                                                                                | 207                                                                                 | 208                                                                                  |
|   |   |   |   |   |   |   |   |
| 160                                                                                | 163                                                                                | 164                                                                                | 168                                                                                | 209                                                                                | 218                                                                                | 219                                                                                 | 220                                                                                  |
|   |   |   |   |   |   |   |   |
| 176                                                                                | 177                                                                                | 178                                                                                | 179                                                                                | 222                                                                                | 223                                                                                | 224                                                                                 | 228                                                                                  |
|   |   |   |   |   |   |   |   |
| 180                                                                                | 182                                                                                | 184                                                                                | 185                                                                                | 231                                                                                | 236                                                                                | 237                                                                                 | 238                                                                                  |
|   |   |   |   |   |   |   |   |
| 196                                                                                | 187                                                                                | 189                                                                                | 190                                                                                | 239                                                                                | 240                                                                                | 241                                                                                 | 242                                                                                  |
|  |  |  |  |  |  |  |  |
| 191                                                                                | 192                                                                                | 193                                                                                | 195                                                                                | 243                                                                                | 244                                                                                | 245                                                                                 | 247                                                                                  |

  

|                                                                                     |                                                                                     |                                                                                     |                                                                                     |                                                                                     |                                                                                     |                                                                                      |                                                                                       |
|-------------------------------------------------------------------------------------|-------------------------------------------------------------------------------------|-------------------------------------------------------------------------------------|-------------------------------------------------------------------------------------|-------------------------------------------------------------------------------------|-------------------------------------------------------------------------------------|--------------------------------------------------------------------------------------|---------------------------------------------------------------------------------------|
|  |  |  |  |  |  |  |  |
| 248                                                                                 | 249                                                                                 | 250                                                                                 | 251                                                                                 | 282                                                                                 | 283                                                                                 | 284                                                                                  | 285                                                                                   |
|  |  |  |  |  |  |  |  |
| 252                                                                                 | 253                                                                                 | 254                                                                                 | 255                                                                                 | 289                                                                                 | 290                                                                                 | 292                                                                                  | 293                                                                                   |
|  |  |  |  |  |  |  |  |
| 256                                                                                 | 257                                                                                 | 258                                                                                 | 259                                                                                 | 294                                                                                 | 295                                                                                 | 296                                                                                  | 297                                                                                   |
|  |  |  |  |  |  |  |  |
| 260                                                                                 | 261                                                                                 | 262                                                                                 | 263                                                                                 | 298                                                                                 | 299                                                                                 | 300                                                                                  | 301                                                                                   |
|  |  |  |  |  |  |  |  |
| 264                                                                                 | 266                                                                                 | 267                                                                                 | 268                                                                                 | 302                                                                                 | 303                                                                                 | 304                                                                                  | 305                                                                                   |
|  |  |  |  |  |  |  |  |
| 270                                                                                 | 271                                                                                 | 272                                                                                 | 274                                                                                 | 306                                                                                 | 307                                                                                 | 308                                                                                  | 309                                                                                   |
|  |  |  |  |  |  |  |  |
| 275                                                                                 | 277                                                                                 | 278                                                                                 | 281                                                                                 | 310                                                                                 | 311                                                                                 | 312                                                                                  | 313                                                                                   |

(Cont'd) Supplementary Table 10 Decoding table for BDMCA, BDNCA and NYBD.

|                                                                                            |                                                                                            |                                                                                            |                                                                                            |                                                                                            |                                                                                                  |                                                                                              |                                                                                              |
|--------------------------------------------------------------------------------------------|--------------------------------------------------------------------------------------------|--------------------------------------------------------------------------------------------|--------------------------------------------------------------------------------------------|--------------------------------------------------------------------------------------------|--------------------------------------------------------------------------------------------------|----------------------------------------------------------------------------------------------|----------------------------------------------------------------------------------------------|
| 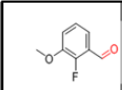<br>314   | <br>315   | <br>316   | <br>317   | <br>346   | <br>347        | <br>348   | <br>349   |
| <br>318   | <br>319   | <br>320   | <br>322   | <br>350   | <br>352        | <br>353   | <br>354   |
| <br>323   | <br>324   | <br>325   | <br>326   | <br>355   | <br>356        | <br>357   | <br>358   |
| <br>327   | <br>329   | <br>330   | <br>331   | <br>359   | <br>361        | <br>362   | <br>363   |
| <br>332   | <br>333   | <br>335   | <br>336   | <br>365   | <br>366        | <br>367   | <br>368   |
| <br>337   | <br>338   | <br>339   | <br>340   | <br>369   | <br>370        | <br>371   | <br>372   |
| <br>341  | <br>342  | <br>343  | <br>345  | <br>374  | <br>375       | <br>376  | <br>377  |
| <br>378 | <br>382 | <br>383 | <br>385 | <br>417 | <br>421      | <br>423 | <br>424 |
| <br>390 | <br>391 | <br>392 | <br>393 | <br>425 | <br>426      | <br>427 | <br>428 |
| <br>394 | <br>395 | <br>396 | <br>397 | <br>429 | <br>430      | <br>431 | <br>433 |
| <br>401 | <br>403 | <br>404 | <br>405 | <br>435 | <br>437      | <br>438 | <br>440 |
| <br>406 | <br>407 | <br>409 | <br>410 | <br>439 | <br>441      | <br>442 | <br>443 |
| <br>411 | <br>413 | <br>414 | <br>415 | <br>444 | <br>445      | <br>446 | <br>447 |
|                                                                                            |                                                                                            |                                                                                            |                                                                                            | <br>a   | <br>BDNCA3-b |                                                                                              |                                                                                              |

**Supplementary Table 11 Decoding table for TAM-1, TAM-1', TAM-2, TAM-3.**

|                                                                                    |                                                                                    |                                                                                    |                                                                                     |                                                                                      |
|------------------------------------------------------------------------------------|------------------------------------------------------------------------------------|------------------------------------------------------------------------------------|-------------------------------------------------------------------------------------|--------------------------------------------------------------------------------------|
| 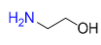  |   |   |   |   |
| 1                                                                                  | 2                                                                                  | 3                                                                                  | 4                                                                                   | 5                                                                                    |
|   |   |   |   |   |
| 6                                                                                  | 7                                                                                  | 8                                                                                  | 9                                                                                   | 10                                                                                   |
|   |   |   |   |   |
| 11                                                                                 | 12                                                                                 | 13                                                                                 | 14                                                                                  | 15                                                                                   |
|   |   |   |   |   |
| 16                                                                                 | 17                                                                                 | 18                                                                                 | 19                                                                                  | 20                                                                                   |
|   |   |   |   |   |
| 21                                                                                 | 22                                                                                 | 23                                                                                 | 24                                                                                  | 25                                                                                   |
|  |  |  |  |  |
| 26                                                                                 | 27                                                                                 | 28                                                                                 | 29                                                                                  | 30                                                                                   |

## Supplementary Methods

*Reagent-* All the chemicals and solvents were purchased from Sigma Aldrich, Alfa Aesar, Fluka, MERCK, Tocris or Acros, and used without further purification. Normal phase purifications were carried out using Merck Silica Gel 60 (particle size: 0.040-0.063 mm, 230-400 mesh). Analytical characterization was performed on a HPLC-MS (Agilent-1200 series) with a DAD detector and a single quadrupole mass spectrometer (6130 series) with an ESI probe. <sup>1</sup>H-NMR and <sup>13</sup>C-NMR spectra were recorded on Bruker Avance 300 MHz NMR spectrometers, and chemical shifts are expressed in parts per million (ppm) and coupling constants are reported as a J value in Hertz (Hz). High resolution mass spectrometry (HRMS) data was recorded on a Micro mass VG 7035 (Mass Spectrometry Laboratory at National University of Singapore (NUS)). Spectroscopic and quantum yield data were measured on spectroscopic measurements, performed on a fluorometer and UV/VIS instrument, Synergy 4 of Biotek Company. The slit width was 1 nm for both excitation and emission, and the data analysis was performed using GraphPrism 5.0.

## Synthesis of CO-1

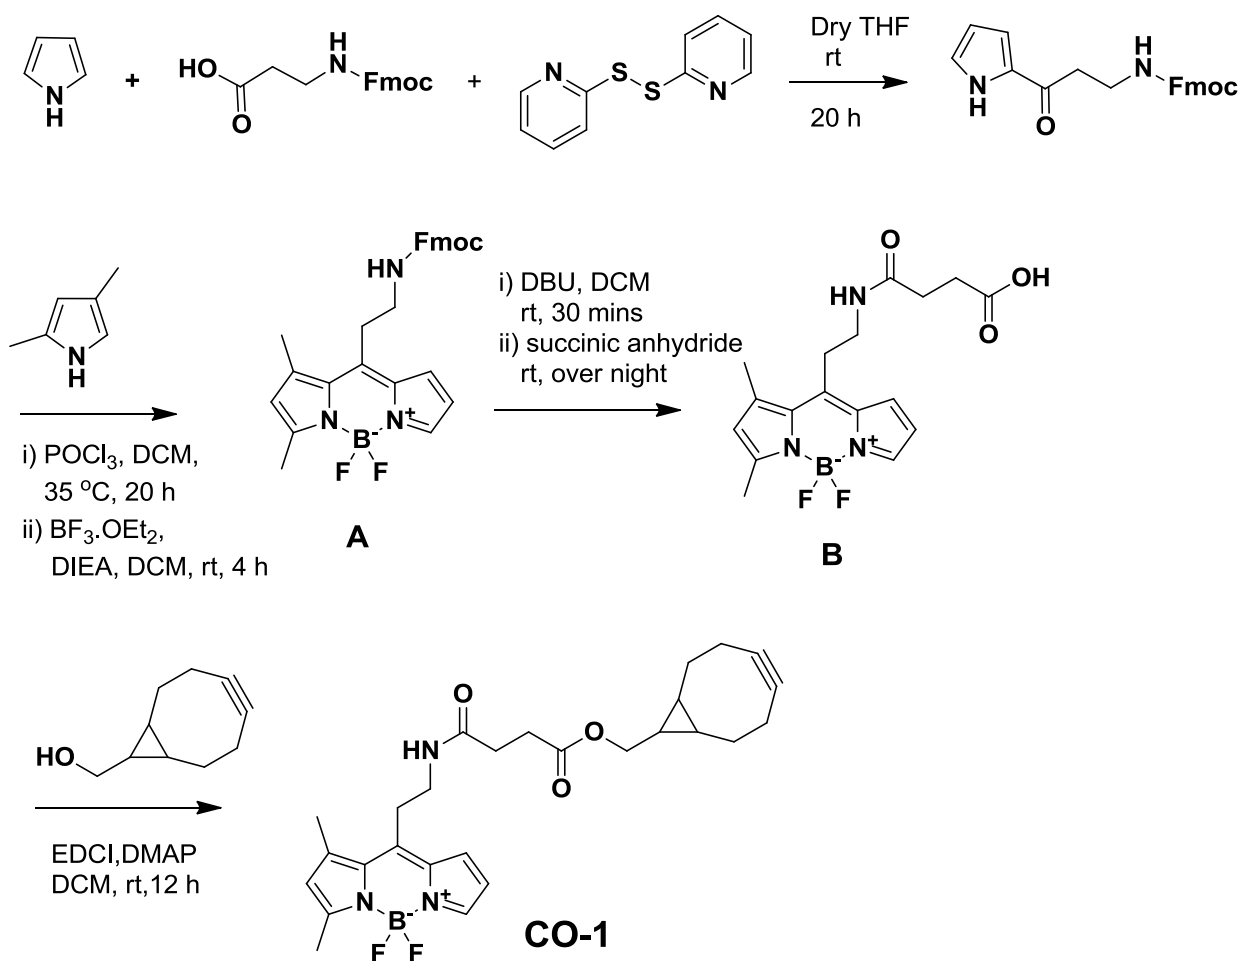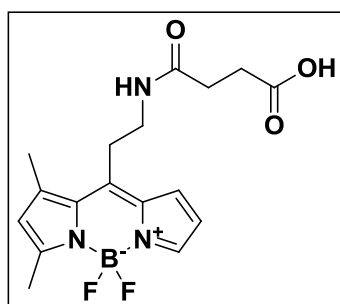

Compound **B** (10-(2-(3-carboxypropanamido)ethyl)-5,5-difluoro-7,9-dimethyl-5H-dipyrrolo[1,2-c:2',1'-f][1,3,2]diazaborinin-4-ium-5-uide):

Compound **A** was prepared according to the reported procedure<sup>6</sup>.

Compound **A** (20 mg, 0.04 mmol) was dissolved in DCM (1 mL). To it, DBU (6.27 mg, 6.1 μL, 0.04 μmol) was added drop wise and the reaction was stirred for 30 mins in rt. To the reaction mixture, succinic anhydride (8mg, 0.08 mmol) was added and stirred over night in rt. The reaction mixture was evaporated and crude product was purified by column chromatography (MeOH:DCM = 1:10). Product was obtained as red solid (10.9 mg, 75.4%). <sup>1</sup>H NMR (CDCl<sub>3</sub>,



300 MHz):  $\delta$  7.61 (s, 1H), 7.12 (d,  $j$  = 3 Hz, 1H), 6.46 (d,  $j$  = 3 Hz, 1H), 6.19 (s, 1H), 3.19 (t,  $j$  = 6 Hz, 2H), 2.68-2.63 (m, 4H), 2.58 (s, 3H), 2.46 (s, 3H), 2.43 (t,  $j$  = 6 Hz, 2H). EI-MS ( $m/z$ ): Calcd for  $C_{17}H_{20}BF_2N_3O_3$  363.15; found 362.1 (M-H).

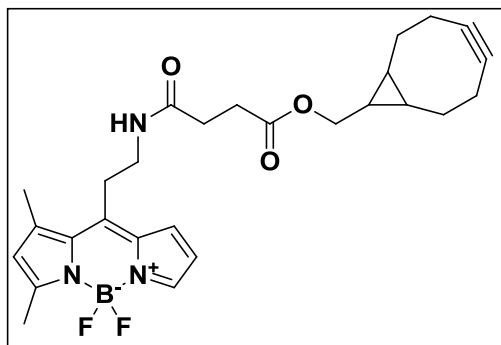

#### *Synthesis and characterization of CO-1:*

Compound **B** (5 mg, 0.013 mmol), bicyclo[6.1.0]non-4-yn-9-ylmethanol (2.47 mg, 0.016 mmol), EDCI (5.25 mg, 0.027 mmol) and DMAP (0.8 mg, 0.006 mmol) were dissolved together in DCM (0.2 mL) and stirred 12h in rt. Water (0.5 mL) was added to the reaction mixture and the organic layer was extracted in DCM. The crude was purified by column chromatography (MeOH:DCM = 0.5 : 10). Product was obtained as red solid (5.1 mg, 76.3%).  $^1H$  NMR ( $CDCl_3$ , 300 MHz):  $\delta$  7.61 (s, 1H), 7.15 (d,  $j$  = 3 Hz, 1H), 6.45 (dd,  $j$  = 6 Hz,  $j$  = 3 Hz, 1H), 6.19 (s, 1H), 4.19 (d,  $j$  = 9 Hz, 2H), 3.19 (t,  $j$  = 7.5 Hz, 2H), 2.66 (m, 2H), 2.58 (s, 3H), 2.47 (s, 3H), 2.43 (t,  $j$  = 6 Hz, 2H), 2.30-2.22 (m, 4 H), 1.61-1.52 (m, 2H), 1.31—1.25 (m, 3H), 0.90-0.85 (m, 2H).  $^{13}C$  NMR (75 MHz,  $CDCl_3$ )  $\delta$  173.00, 171.79, 161.18, 145.16, 142.56, 138.27, 134.08, 133.92, 124.21, 123.77, 116.04, 98.76, 62.80, 41.38, 30.93, 29.61, 29.37, 29.03, 21.37, 20.18, 17.37, 16.21, 15.01. HRMS:  $m/z$  calcd for  $C_{27}H_{31}BF_2N_3O_3$  (M-H) $^-$  494.2437, found 494.2424.  $\lambda_{abs}/\lambda_{em}$  = 495/510 nm and quantum yield = 0.66 (Tetramethyl Bodipy as standard), extinction co-efficient of **CO-1** = 66,668  $M^{-1} cm^{-1}$  measured in DMSO.

## Synthesis of CO-1H

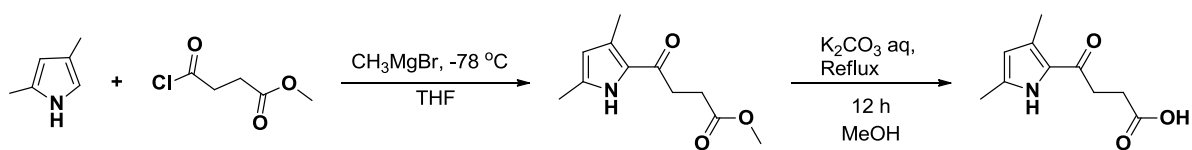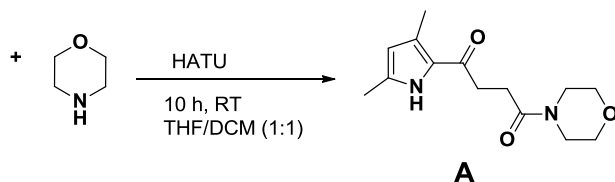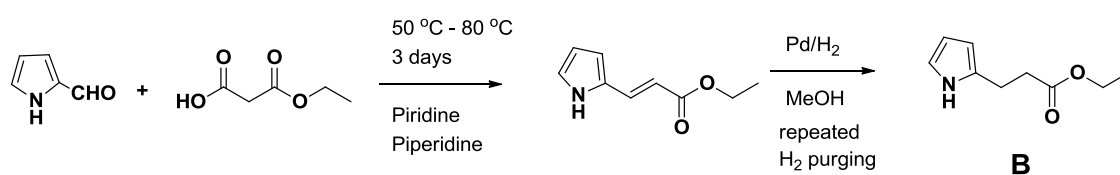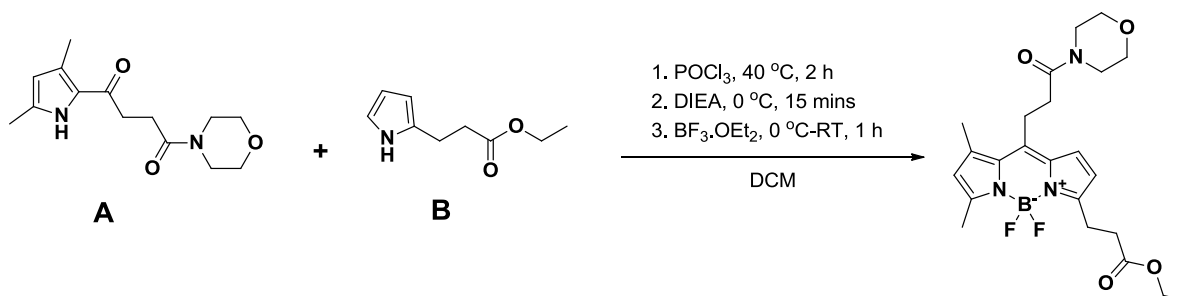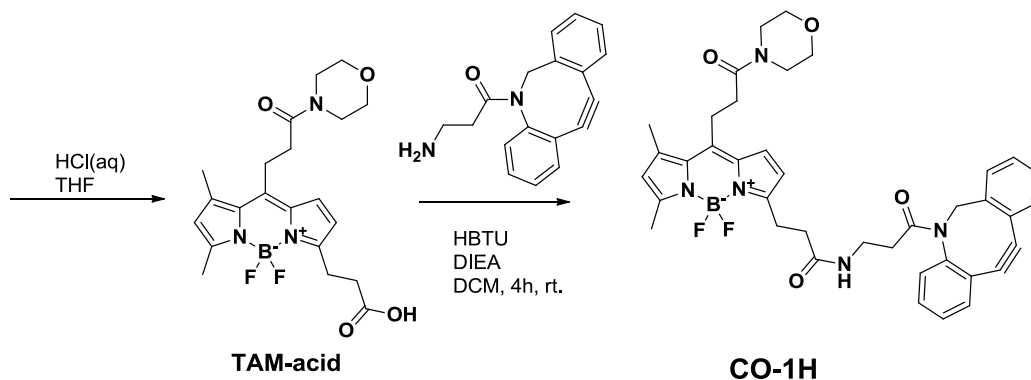

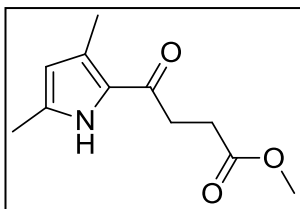

*Methyl 4-(3,5-dimethyl-1H-pyrrol-2-yl)-4-oxobutanoate:*

2,4-dimethyl-1H-pyrrole (3.16 g, 3.42 mL, 33.21 mmole) was dissolved in dry THF (120 mL) and cooled to  $-78^{\circ}\text{C}$  under nitrogen atmosphere.  $\text{CH}_3\text{MgBr}$  (3 M in THF, 7.2 mL, 39.85 mmol) was added drop wise and the reaction mixture was stirred at  $-78^{\circ}\text{C}$  for 30 mins. Temperature of the reaction mixture was raised to  $-20^{\circ}\text{C}$  and stirred for another 30 mins. Methyl 4-chloro-4-oxobutanoate (7.9 g, 6.54 mL, 53.13 mmol) was added to the reaction mixture and stirred at  $-78^{\circ}\text{C}$  for 30 mins and at room temperature for 30 mins. The reaction mixture was quenched by the addition of saturated  $\text{NH}_4\text{Cl}$  solution at  $0^{\circ}\text{C}$ . Organic layer was extracted after repeated washing the mixture in water and ethyl acetate. Organic layer was dried over  $\text{Na}_2\text{SO}_4$  and evaporated over rotary evaporator. Crude was purified by column chromatography (EA: Hexane = 1: 5) to obtain pure product as a white floppy solid (3.2 g, 46%).  $^1\text{H}$  NMR (300 MHz,  $\text{CDCl}_3$ )  $\delta$  9.54 (s, 1H), 5.81 (s, 1H), 3.68 (s, 3H), 3.04 (t, J = 6.7 Hz, 2H), 2.73 (t, J = 6.7 Hz, 2H), 2.36 (s, 3H), 2.25 (s, 3H). EI-MS (m/z): Calcd for  $\text{C}_{11}\text{H}_{15}\text{NO}_3$  209.1; found 210.1 (M+H).

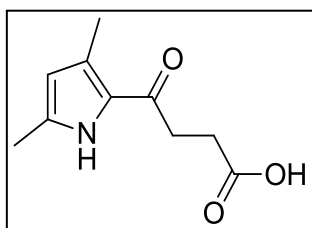

*4-(3,5-dimethyl-1H-pyrrol-2-yl)-4-oxobutanoic acid:*

Methyl 4-(3,5-dimethyl-1H-pyrrol-2-yl)-4-oxobutanoate (1 g, 4.78 mmol) was dissolved in ethanol (40 mL).  $\text{K}_2\text{CO}_3$  (1.32 g, 9.57 mmol), dissolved in water (15 mL) was added to it. The reaction mixture was heated to reflux overnight. Then the solution was cooled to room temperature. The solvent was removed in rotary evaporator. Water (20 mL) was added and the solution was acidified (pH= 2) upon addition of 10% HCl solution. The mixture was filtered and dried over vacuum to obtain product as gray powdered solid (0.7 g, 75 %).  $^1\text{H}$  NMR (300 MHz,  $\text{DMSO-d}_6$ )  $\delta$  12.03 (s, 1H), 11.19 (s, 1H), 5.77 (s, 1H), 2.91 (t, J = 6.5 Hz, 2H), 2.52 (t, J = 6.5 Hz, 2H), 2.26 (s, 3H), 2.17 (s, 3H).  $^{13}\text{C}$

NMR (75 MHz, DMSO-d<sub>6</sub>)  $\delta$  187.04, 174.44, 134.04, 127.81, 112.08, 28.17, 14.33, 12.91. EI-MS (m/z): Calculated for C<sub>10</sub>H<sub>13</sub>NO<sub>3</sub> 195.0; found 194.0 (M-H).

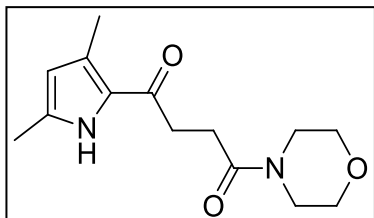

*1-(3,5-dimethyl-1H-pyrrol-2-yl)-4-morpholino butane-1,4-dione*

(A):

4-(3,5-dimethyl-1H-pyrrol-2-yl)-4-oxobutanoic acid (0.6 g, 3.07 mmol), morpholine (0.53 g, 6.1 mmol), HBTU (1.4 g, 3.68 mmol) were dissolved in dry THF. DIEA (1.6 mL, 9.21 mmol) was added to it and the reaction mixture was stirred for 4 hours under nitrogen atmosphere. Then the solvent was evaporated in rota vapour. Crude was dissolved in ethyl acetate and washed with water two times. Organic layer was dried over Na<sub>2</sub>SO<sub>4</sub> and evaporated over rotary evaporator. Crude was purified by column chromatography (EA: Hexane = 1: 4) to obtain pure product as a yellowish white solid (0.62 g, 78%). <sup>1</sup>H NMR (300 MHz, CDCl<sub>3</sub>)  $\delta$  9.42 (s, 1H), 5.80 (s, 1H), 3.66-3.55 (m, 8H), 3.08 (t, J = 6.6 Hz, 2H), 2.72 (t, J = 6.3 Hz, 2H), 2.36 (s, 3H), 2.23 (s, 3H). <sup>13</sup>C NMR (75 MHz, CDCl<sub>3</sub>)  $\delta$  187.55, 170.81, 128.01, 112.70, 77.41, 76.98, 76.56, 66.77, 66.51, 45.81, 42.05, 34.11, 26.90, 14.45, 12.91. EI-MS (m/z): Calcd for C<sub>14</sub>H<sub>20</sub>N<sub>2</sub>O<sub>3</sub> 264.1; found 265.1 (M+H).

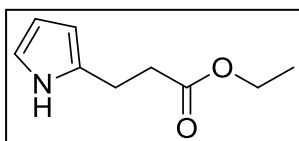

*Ethyl 3-(1H-pyrrol-2-yl)propanoate:*

This compound was synthesized as reported.<sup>7</sup>

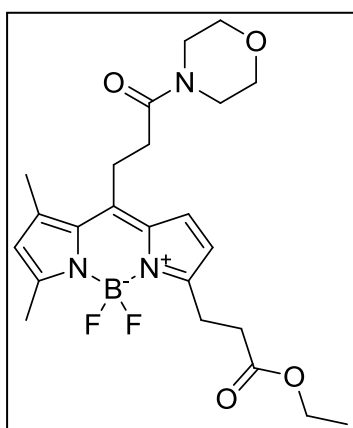

*3-(3-ethoxy-3-oxopropyl)-5,5-difluoro-7,9-dimethyl-10-(3-morpholino-3-oxopropyl)-5H-dipyrrolo[1,2-c:2',1'-f][1,3,2]diazaborinin-4-ium-5-uide:*

1-(3,5-dimethyl-1H-pyrrol-2-yl)-4-morpholinobutane-1,4-dione (A) (58 mg, 0.22 mmol) and ethyl 3-(1H-pyrrol-2-yl)propanoate (B) (37 mg, 0.22 mmol) were dissolved in DCM (1 mL). POCl<sub>3</sub> (67 mg, 41 μL, 0.44 mmol) was added dropwise to the reaction mixture in nitrogen atmosphere. The reaction mixture was stirred at 40° C for 2h. Then it was cooled to 0° C, DIEA (128 mg, 172 μL, 0.99 mmole) was added drop wise and stirred for 15 mins. BF<sub>3</sub>.OEt<sub>2</sub> (140 mg, 122 μL, 0.99 mmole) was added to the reaction mixture at 0° C and stirred for 1h. Solvent was evaporated from the reaction mixture and crude was purified by column chromatography (EA: Hexane = 1: 1). Product was obtained as red solid (46 mg, 45.3%). <sup>1</sup>H NMR (300 MHz, CDCl<sub>3</sub>) δ 7.03 (d, J = 4.1 Hz, 1H), 6.25 (d, J = 4.1 Hz, 1H), 6.11 (s, 1H), 4.14 (t, J = 7.5 Hz, 3H), 3.60 – 3.52 (m, 4H), 3.31 – 3.23 (m, 8H), 2.71 – 2.59 (m, 4H), 2.53 (s, 3H), 2.38 (s, 3H), 1.23 (t, J = 6 Hz, 3H). <sup>13</sup>C NMR (75 MHz, CDCl<sub>3</sub>) δ 172.43, 169.27, 158.62, 156.04, 143.98, 142.79, 133.75, 132.31, 124.96, 122.81, 116.19, 66.29, 60.44, 45.75, 42.06, 38.52, 35.06, 33.38, 24.59, 23.72, 15.93, 14.70, 14.12. EI-MS (m/z): Calcd for C<sub>23</sub>H<sub>30</sub>BF<sub>2</sub>N<sub>3</sub>O<sub>4</sub> 461.2; found 460.1 (M-H).

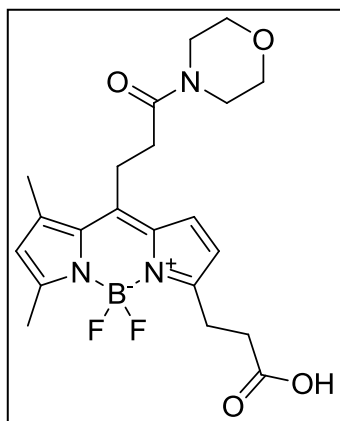

*3-(2-carboxyethyl)-5,5-difluoro-7,9-dimethyl-10-(3-morpholino-3-oxopropyl)-5H-dipyrrolo[1,2-c:2',1'-f][1,3,2]diazaborinin-4-ium-5-uide:*

*3-(3-ethoxy-3-oxopropyl)-5,5-difluoro-7,9-dimethyl-10-(3-morpholino-3-oxopropyl)-5H-dipyrrolo[1,2-c:2',1'-*

*f][1,3,2]diazaborinin-4-ium-5-uide* (45 mg, 0.1 mmol) was dissolved in THF (6 mL). To it, mixture of 37% HCl (0.2 mL) and water (1 mL) was added of drop wise. The reaction mixture was stirred for 72 h in room temperature. The organic layer was poured in water (20 mL) followed by ethyl acetate (10 mL). Then the organic layer was extracted and washed several times with water to remove excess HCl in the reaction mixture. The organic layer was dried in Na<sub>2</sub>SO<sub>4</sub> and dried in rotary evaporator. The crude was purified by column

chromatography (EA: Hexane = 9: 1). Product was obtained as red solid (17.7 mg, 41%).  $^1\text{H}$  NMR (300 MHz,  $\text{CDCl}_3$ )  $\delta$  7.05 (d,  $J = 4.0$  Hz, 1H), 6.30 (d,  $J = 4.1$  Hz, 1H), 6.13 (s, 1H), 3.62 – 3.53 (m, 4H), 3.34-3.23 (m, 8H), 2.80 (t,  $J = 7.5$  Hz, 2H), 2.68 – 2.60 (t,  $J = 7.5$  Hz, 2H), 2.55 (s, 3H), 2.40 (s, 3H). EI-MS ( $m/z$ ): Calcd for  $\text{C}_{21}\text{H}_{26}\text{BF}_2\text{N}_3\text{O}_4$  433.19; found 432.1 (M-H).

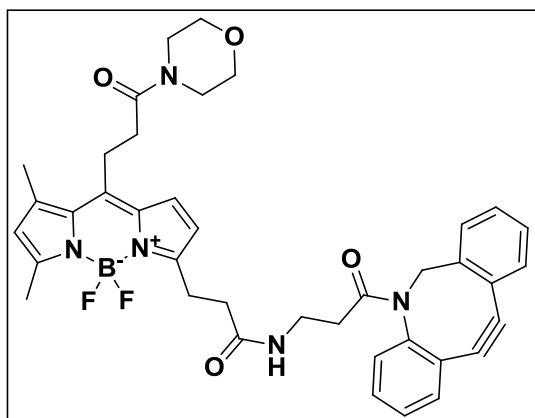

#### *Synthesis and characterizations of CO-1H:*

3-(2-carboxyethyl)-5,5-difluoro-7,9-dimethyl-10-(3-morpholino-3-oxopropyl)-5H-dipyrrolo[1,2-c:2',1'-f][1,3,2]diazaborinin-4-ium-5-uide (5 mg, 0.011 mmol), Dibenzocyclooctyne-amine (3.2 mg, 0.011 mmol), HBTU (5.2 mg, 0.014 mmol) and DIEA

(1.8 mg, 2.4  $\mu\text{L}$ , 0.014 mmol) were dissolved together in DCM (0.2 mL) and stirred 8h in rt. Water (0.5 mL) was added to the reaction mixture and the organic layer was extracted in DCM. The crude was purified by column chromatography (MeOH: DCM = 1: 5). Product was obtained as red solid (6.4 mg, 84.1%).  $^1\text{H}$  NMR (300 MHz,  $\text{CDCl}_3$ )  $\delta$  7.61 (s, 1H), 7.14 (d,  $J = 3.8$  Hz, 1H), 6.45 (dd,  $J = 4.0, 2.1$  Hz, 1H), 6.18 (s, 1H), 5.99 (t,  $J = 6.1$  Hz, 1H), 4.17 (d,  $J = 8.2$  Hz, 2H), 3.55 (dd,  $J = 13.7, 6.9$  Hz, 2H), 3.18 (t,  $J = 7.1$  Hz, 2H), 2.66 (t,  $J = 6.7$  Hz, 2H), 2.58 (s, 3H), 2.47 (s, 3H), 2.43 (t,  $J = 6.7$  Hz, 2H), 2.25 – 2.21 (m, 4H), 1.62 – 1.52 (m, 4H), 0.99 – 0.88 (m, 3H).  $^{13}\text{C}$  NMR (75 MHz,  $\text{CD}_3\text{OD}$ )  $\delta$  172.87, 171.74, 170.39, 158.33, 155.99, 151.07, 147.94, 144.07, 143.49, 131.93, 128.98, 128.56, 128.20, 127.73, 127.44, 126.65, 125.03, 122.79, 122.51, 122.16, 115.82, 114.17, 107.36, 106.20, 66.05, 60.05, 55.11, 45.81, 41.89, 35.21, 34.37, 34.19, 33.93, 29.23, 28.81, 24.35, 19.38, 14.60, 12.97. HRMS:  $m/z$  calcd for  $\text{C}_{39}\text{H}_{40}\text{BF}_2\text{N}_5\text{O}_4$  (M+H) $^+$  692.3141, found 692.3166.

## Synthesis of TPP-Az

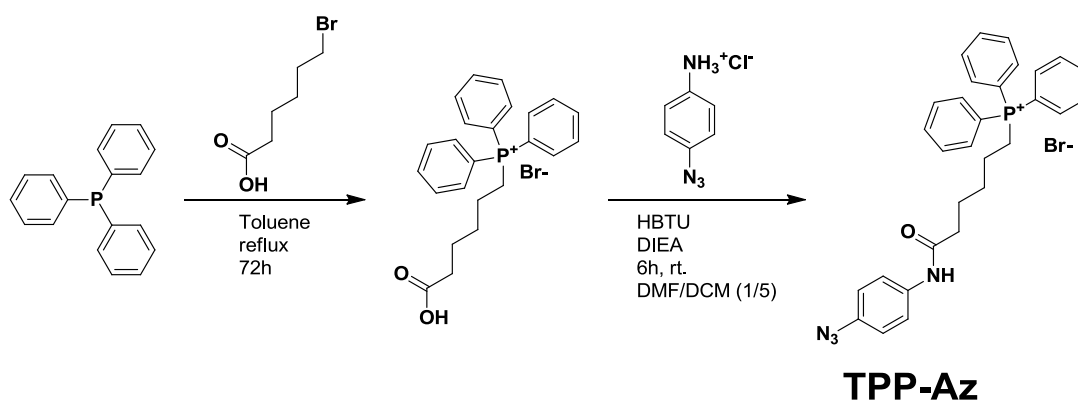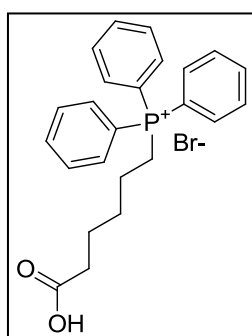

*(5-carboxypentyl)triphenylphosphonium bromide:*

Triphenylphosphine (20 mg, 0.076 mmol) and 6-bromohexanoic acid (14.8 mg, 0.076 mmol) were dissolved in dry toluene (0.2 mL). The reaction mixture was refluxed over 72h. The solution was concentrated. The residue was washed consecutively with benzene ( $3 \times 1$  mL), hexane (1 mL), and

$\text{Et}_2\text{O}$  ( $2 \times 1$  mL). The crystalline white solid was dried to give the pure product (28 mg, 97.5 %).

$^1\text{H}$  NMR (300 MHz,  $\text{CDCl}_3$ )  $\delta$  7.80-7.68 (m, 15H), 3.58 (bs, 2H), 2.34-2.32 (m, 2H), 1.63-1.57

(m, 6H). EI-MS ( $m/z$ ): Calcd for  $\text{C}_{24}\text{H}_{26}\text{O}_2\text{P}^+$  377.16; found 377.1

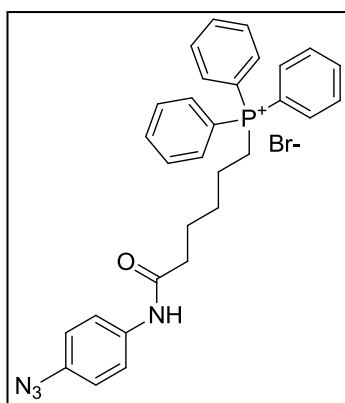

*(6-((4-azidophenyl)amino)-6-oxohexyl)triphenylphosphonium bromide (TPP-Az):*

(5-carboxypentyl)triphenylphosphonium bromide (10 mg, 0.026 mmol), 4-azidobenzylamine hydrochloride (4.5 mg, 0.026 mmol), HBTU (20 mg, 0.052 mmol) were dissolved in mixture of solvents (dry DMF (0.05 mL) and DCM (0.1 mL)). To the reaction mixture,

7  $\mu\text{L}$  of DIEA was added and the reaction mixture was stirred overnight at rt. Solvent was evaporated and the crude was purified by column chromatography (EA: Hexane = 1: 2). Product was obtained as white solid (9.9 mg, 77.7 %).  $^1\text{H}$  NMR ( $\text{DMSO-d}_6$ , 300 MHz): 7.83-7.70 (m,

15H), 7.63 (d,  $j = 9\text{ Hz}$ , 2H), 7.07 (d,  $j = 9\text{ Hz}$ , 2H), 3.62 (bs, 2H), 2.30-2.25 (m, 2H), 1.61-1.54 (m, 6H).  $^{13}\text{C}$  NMR (75 MHz, DMSO- $d_6$ )  $\delta$  171.29, 136.94, 135.23, 133.99, 130.67, 120.85, 119.72, 119.47, 118.33, 36.14, 31.13, 24.64, 18.43, 17.08. HRMS:  $m/z$  calculated for  $\text{C}_{30}\text{H}_{30}\text{N}_4\text{OP}^+$  493.2152, found 493.2153



## Synthesis of Morph-Az

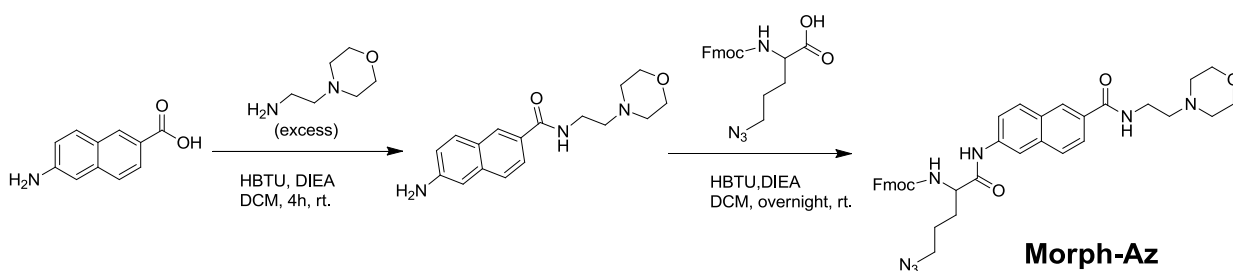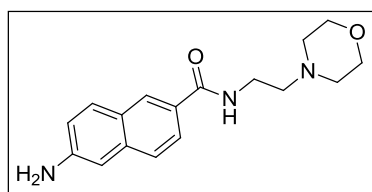

(6-amino-N-(2-morpholinoethyl)-2-naphthamide):

Compound **A** (6-amino-2-naphthoic acid, 25 mg, 0.13 mmol), 2-morpholinoethanamine (69.5 mg, 70  $\mu$ L, 0.53 mmol), HBTU (98.5 mg, 0.26 mmol) were dissolved together in DCM. To the

stirred solution, N,N-Diisopropylethylamine (16.77 mg, 22.6  $\mu$ L, 0.13 mmol) was added drop wise. The reaction mixture was stirred in rt for 4 hours. The solvent was evaporated in rota vapour and the crude was obtained. The crude was purified by column chromatography using EA as eluent. Product was obtained as brown semi solid (21.24 mg, 54.6%).  $^1\text{H}$  NMR ( $\text{CDCl}_3$ , 300 MHz):  $\delta$  7.21 (d, 1H,  $j=3$  Hz), 7.78-7.73 (m, 2H), 7.65 (d,  $j=9$  Hz, 1H), 7.73-7.00 (m, 2H), 3.79 (t,  $j=4.5$  Hz, 4H), 3.65 (q,  $j=6.0$  Hz, 2H), 2.68 (t,  $j=6.0$  Hz 2H), 2.58(t,  $j=4.5$  Hz, 4H).  $^{13}\text{C}$  NMR (75 MHz,  $\text{CDCl}_3$ )  $\delta$  167.69, 145.89, 136.50, 130.38, 128.29, 127.52, 126.73, 125.94, 123.96, 118.81, 107.84, 66.81, 57.03, 53.27, 36.00. EI-MS ( $m/z$ ): Calcd for  $\text{C}_{17}\text{H}_{21}\text{N}_3\text{O}_2$ , 299.16; found 300.0 (M+H).

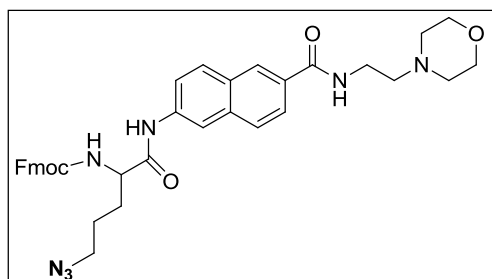

Synthesis of compound **Morph-Az**

((9H-fluoren-9-yl)methyl(5-azido-1-((6-((2-morpholinoethyl)carbamoyl)naphthalen-2-yl)amino)-1-oxopentan-2-yl)carbamate):

Compound **B** (20 mg, 0.066 mmol), 2-((((9H-fluoren-9-yl)methoxy)carbonyl)amino)-5-azidopentanoic acid (38 mg, 0.01 mmol), HBTU (35 mg, 0.092 mmol) were dissolved together in DCM. To the stirred solution, N,N-Diisopropylethylamine (8.5 mg, 11.5  $\mu$ L, 0.066 mmol) was added drop wise. The reaction mixture was stirred in rt overnight. The solvent was evaporated in rota vapour and the crude was obtained. The crude was purified by column chromatography using (MeOH:DCM = 1 : 10). Product was obtained as white solid (18.5 mg, 42.5%).  $^1\text{H}$  NMR ( $\text{CDCl}_3$ , 300 MHz):  $\delta$  8.94 (s, 1H), 8.28 (s, 1H), 8.20 (s, 1H), 7.80-7.69 (m, 5H), 7.63-7.59 (m, 2H), 7.44-7.39 (m, 3H), 7.33-7.29 (m, 2H), 5.81 (d,  $j$ = 9 Hz, 1H), 4.53-4.49 (m, 2H), 4.26 (t,  $j$ = 7.5 Hz, 1H), 3.88 (t,  $j$ = 4.5 Hz, 4H), 3.77-3.73 (m, 2H), 3.42-3.35 (m, 2H), 2.92-2.85 (m, 2H), 2.84-2.74 (m, 4H), 2.07-1.65 (m, 4H).  $^{13}\text{C}$  NMR (75 MHz,  $\text{CDCl}_3$ )  $\delta$ . 171.69, 166.71, 156.47, 144.23, 144.13, 141.09, 138.40, 135.11, 130.00, 129.90, 129.14, 128.00, 127.73, 127.68, 127.59, 127.42, 125.69, 125.06, 121.02, 120.47, 115.34, 66.12, 66.06, 55.54, 50.74, 47.06, 35.48, 31.62, 29.38, 26.96, 25.49, 22.43. HRMS:  $m/z$  calcd for  $\text{C}_{37}\text{H}_{39}\text{N}_7\text{O}_5$  ( $\text{M}+\text{H}$ ) $^-$  661.3085, found 661.3046.

## Synthesis of Sphingo-Az

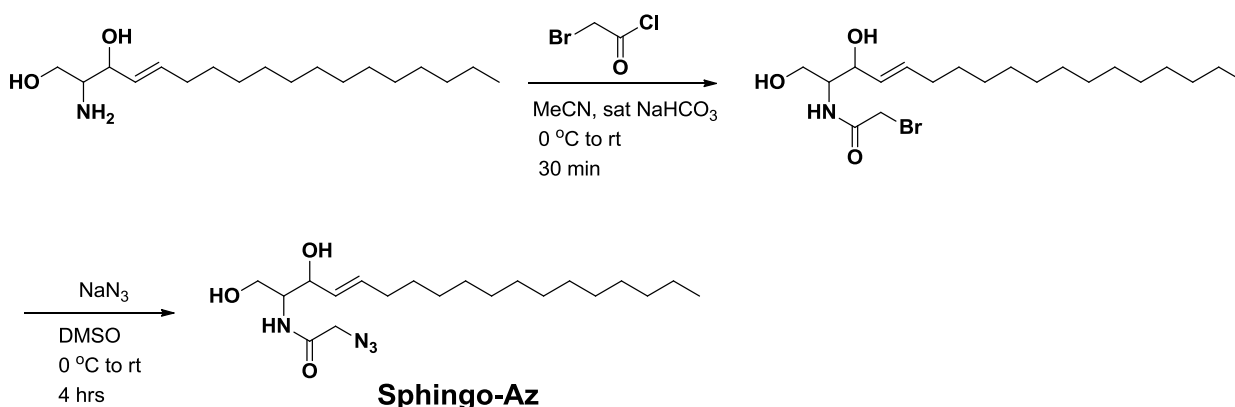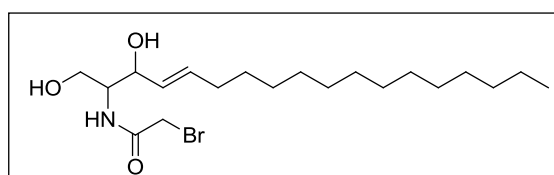

*((E)*-2-bromo-*N*-(1,3-dihydroxyoctadec-4-en-2-

yl)acetamide):

Sphingosine (20 mg, 0.066 mmol) was dissolved

in acetonitrile (30 mL). To this solution, 100  $\mu\text{L}$  of saturated sodium bicarbonate solution was added. The solution was kept in ice bath and then bromoacetyl chloride (42  $\mu\text{L}$ , 0.266 mmol) was added slowly and reaction was allowed to stir at room temperature for 30 min. The reaction was monitored by TLC using 20% Ethyl acetate/Hexane system. Upon completion of the reaction, solvent was removed under reduced pressure to dryness. Then around 20 mL of Ethyl acetate was added and then the organic layer was washed with water, brine and collected, dried over sodium sulphate and then evaporated to obtain 25 mg of white solid crude. Crude was directly carried forward for the next reaction.

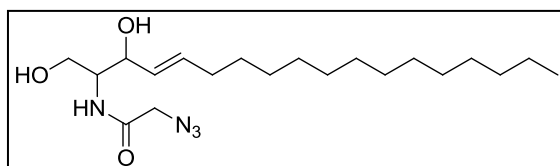

*((E)*-2-azido-*N*-(1,3-dihydroxyoctadec-4-en-2-

yl)acetamide) (**Sphingo-Az**):

Crude compound **2** (25 mg, 0.047 mmol) was

dissolved in of DMSO (10 mL) and then sodium azide (15 mg, 0.23 mmol) was added to the solution. The reaction mixture was allowed to stir at room temperature for 4 hours. The reaction was monitored by TLC using 20% Ethylacetate/Hexane system. Upon completion of the

reaction, water (20 mL) was added slowly to the reaction mixture followed by Ethyl acetate (20 mL). The organic layer was extracted out and then dried over sodium sulphate and then evaporated to obtain white solid crude which was then purified by column chromatography (EA: Hexane = 1: 9). Product was obtained as white solid (12.1 mg, 67.5%).  $^1\text{H}$  NMR (300 MHz,  $\text{CDCl}_3$ )  $\delta$  6.70 (d,  $J = 8.0$  Hz, 1H), 5.87 – 5.70 (m, 1H), 5.49 (dd,  $J = 15.5, 6.2$  Hz, 1H), 4.40 (d,  $J = 4.9$  Hz, 1H), 4.29 – 4.24 (m, 2H), 4.00 (s, 1H), 3.89 (s, 1H), 2.09 – 2.02 (m, 2H), 1.36 – 1.25 (m, 22H), 0.87 (t,  $J = 6.7$  Hz, 3H).  $^{13}\text{C}$  NMR (75 MHz,  $\text{CDCl}_3$ )  $\delta$  166.92, 135.50, 127.63, 72.64, 63.74, 52.59, 52.46, 50.31, 31.83, 29.59, 29.51, 29.39, 29.26, 29.12, 28.98, 22.60, 14.02. HRMS:  $m/z$  calcd for  $\text{C}_{20}\text{H}_{38}\text{N}_4\text{O}_3$  405.2836 ( $\text{M}+\text{Na}$ ) $^+$ , found 405.2847.

## Synthesis of BOR-1

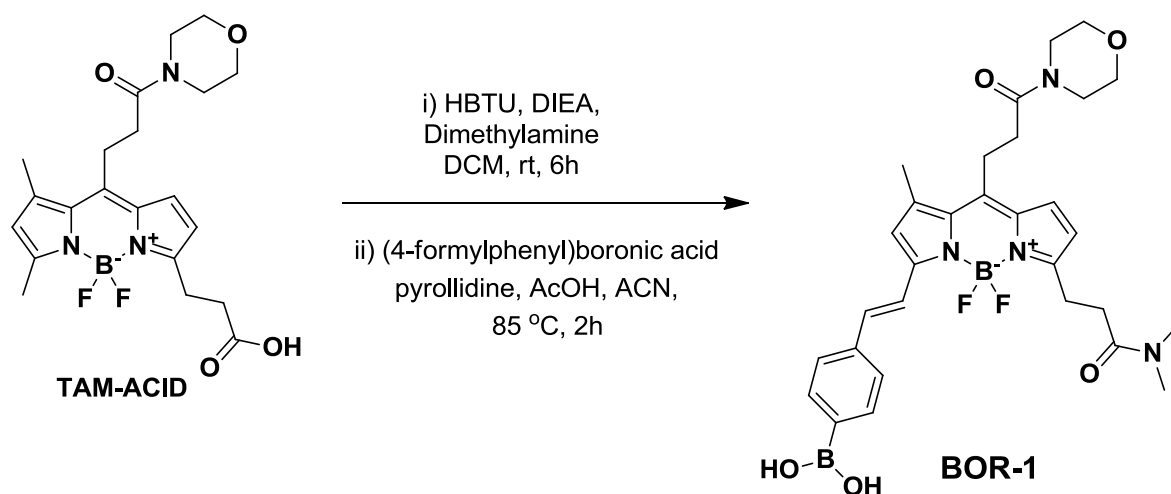

**TAM-ACID** (100 mg, 0.23 mmol), Dimethyl amine (31  $\mu$ L, 0.46 mmol), HBTU (174.3 mg, 0.46 mmol) and DIEA (80  $\mu$ L, 0.46 mmol) were dissolved in dry DCM (4 mL). The solution was stirred 6h in rt. The reaction was monitored by TLC. Then the solvent was evaporated and amide product was purified in column chromatography. The product was taken to the next step. The amide product (40 mg, 0.086 mmol), (4-formylphenyl)boronic acid (28  $\mu$ L, 0.347 mmol), were dissolved in ACN (1 mL). Acetic acid (30  $\mu$ L, 0.516 mmol) and pyrrolidine (43  $\mu$ L, 0.516 mmol) were added to the reaction mixture and the solution was stirred at 85 °C. TLC was monitored in every 10 mins interval. After 2 hours, the solution was evaporated and the product was purified in column chromatography to obtain BOR 1 as red solid (29 mg, 58.5%).  $^1\text{H}$  NMR (d-acetone, 300 MHz):  $\delta$  7.95 (d,  $j$  = 9 Hz, 2H), 7.65 (d,  $j$  = 6 Hz, 2H), 7.35 (d,  $j$  = 3 Hz, 1H), 7.30 (s, 1H), 7.04 (s, 1H), 6.43 (d,  $j$  = 3 Hz, 1H), 5.78 (s, 1H), 3.57-3.51 (m, 4H), 3.33-3.23 (m, 8H), 2.63-2.56 (m, 2H), 2.52 (s, 3H), 2.16 (d,  $j$  = 9 Hz, 2H), 1.59 (m, 2H), 1.10 (t,  $j$  = 6Hz, 3H). HRMS (m/z): Calcd for  $\text{C}_{30}\text{H}_{36}\text{B}_2\text{F}_2\text{N}_4\text{O}_5$  (-F) 573.2856; found 573.2842 (M-F).

## Synthesis of BOR-2

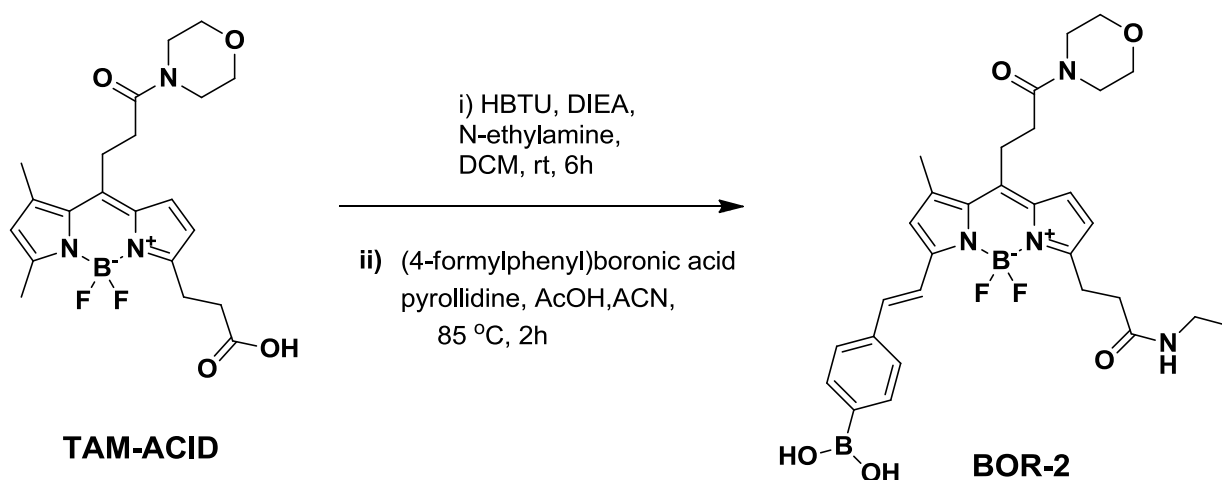

**TAM-ACID** (100 mg, 0.23 mmol), ethylamine hydrochloride (37.5 mg, 0.46 mmol), HBTU (174.3 mg, 0.46 mmol) and DIEA (80  $\mu$ L, 0.46 mmol) were dissolved in dry DCM (4 mL). The solution was stirred 6h in rt. The reaction was monitored by TLC. Then the solvent was evaporated and amide product was purified in column chromatography. The product was taken to the next step. The amide product (25 mg, 0.054 mmol), (4-formylphenyl)boronic acid (32.5 mg, 0.217 mmol), were dissolved in ACN (0.8 mL). Acetic acid (19  $\mu$ L, 0.324 mmol) and pyrrolidine (27  $\mu$ L, 0.324 mmol) were added to the reaction mixture and the solution was stirred at 85 °C. TLC was monitored in every 10 mins interval. After 2 hours, the solution was evaporated and the product was purified in column chromatography to obtain BOR 2 as red solid (17.5 mg, 54.7%).  $\delta$  7.96 (d,  $j = 9$  Hz, 2H), 7.67 (d,  $j = 6$  Hz, 2H), 7.36 (d,  $j = 3$  Hz, 1H), 7.32 (s, 1H), 7.06 (s, 1H), 6.45 (d,  $j = 3$  Hz, 1H), 5.79 (s, 1H), 3.58-3.44 (m, 10H), 3.34-3.24 (m, 6H), 2.64-2.57 (m, 2H), 2.52 (s, 3H), 2.16 (d,  $j = 9$ Hz, 2H), 1.61 (m, 2H). HRMS (m/z): Calcd for  $C_{30}H_{36}B_2F_2N_4O_5$  (-F) 573.2856; found 573.2841 (M-F).

## Synthesis of BOR-1H

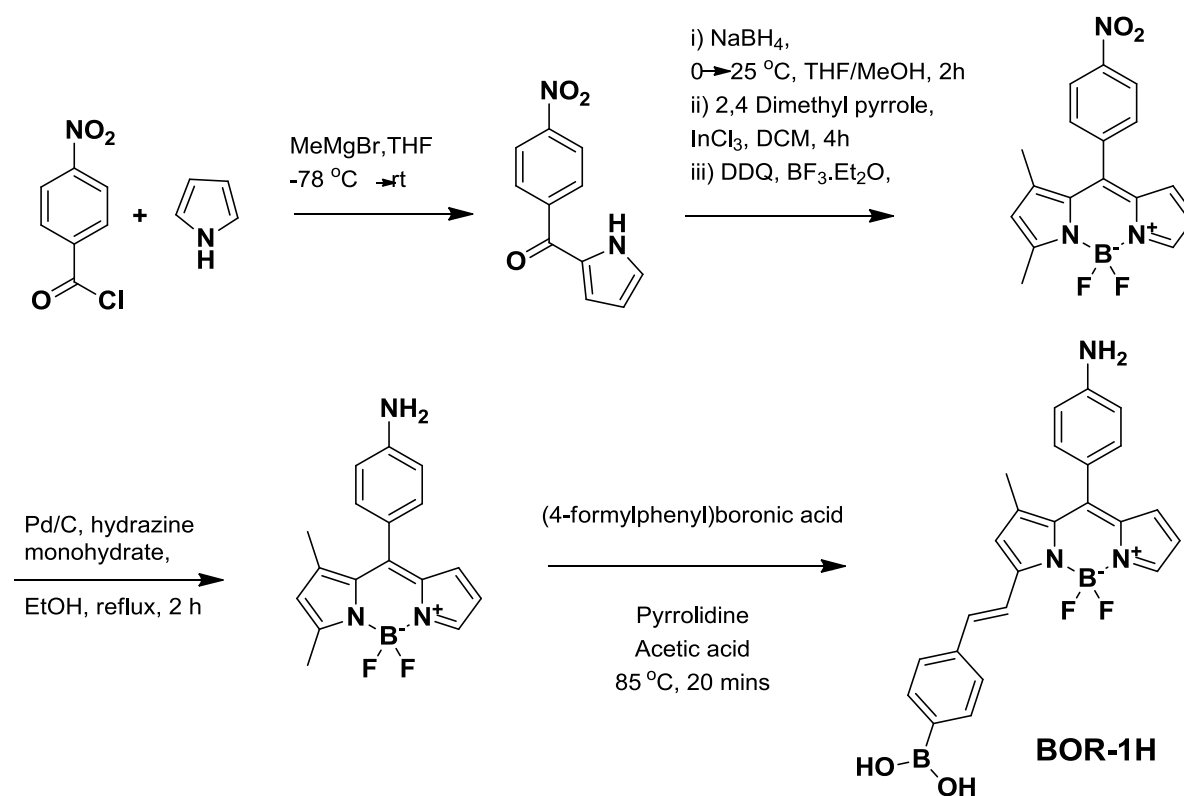

BDN-amine was prepared according to the reported procedure<sup>8</sup>. BDN amine (24 mg, 0.077 mmol), (4-formylphenyl)boronic acid (46.2 mg, 0.308 mmol), were dissolved in ACN (1 mL). Acetic acid (27  $\mu\text{L}$ , 0.462 mmol) and pyrrolidine (38  $\mu\text{L}$ , 0.462 mmol) were added to the reaction mixture and the solution was stirred at 85  $^\circ\text{C}$ . TLC was monitored in every 10 mins interval. After 2 hours, the solution was evaporated and the product was purified in column chromatography (MeOH:DCM = 15:85) to obtain BOR 1H as red solid (16.1 mg, 47.2%). <sup>1</sup>H NMR (d-acetone, 300 MHz):  $\delta$  7.96 (d,  $j = 9$  Hz, 2H), 7.70-7.65 (m, 4H), 7.21 (d,  $j = 9$  Hz, 2H), 7.06 (s, 1H), 7.04 (s, 1H), 6.86 (d, 2H), 6.63 (s, 1H), 6.49 (s, 1H), 1.83 (s, 3H). HRMS (m/z): Calcd for C<sub>24</sub>H<sub>21</sub>B<sub>2</sub>F<sub>2</sub>N<sub>3</sub>O<sub>2</sub> 443.1788; found 442. 1706 (M-H).

## Synthesis of BOR-2H

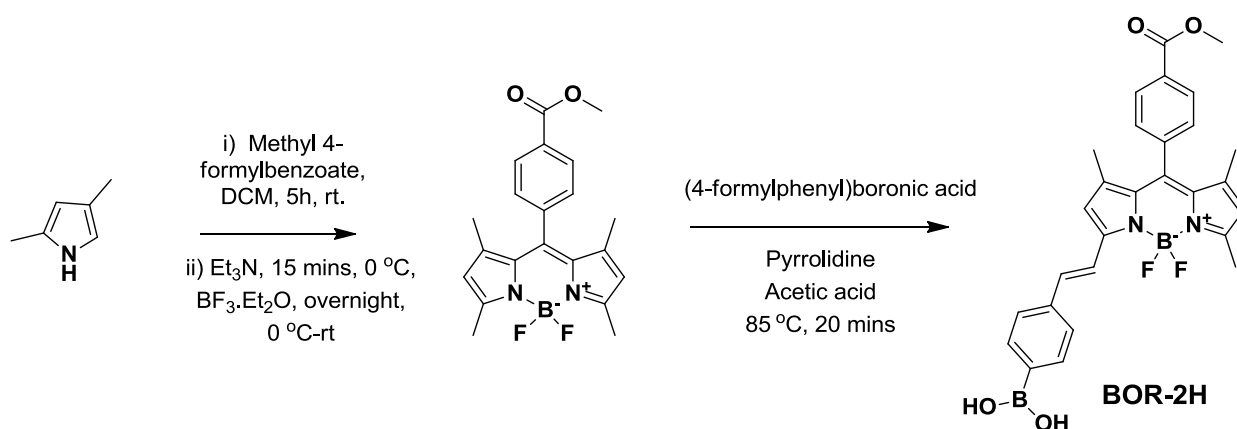

Methyl 4-formylbenzoate (4g, 20 mmol), 2,4-dimethyl-1H-pyrrole (4.56 mL, 44.3 mmol) were dissolved in dry DCM and stirred in N<sub>2</sub> atmosphere for 5h. The reaction mixture was cooled to 0 °C. Triethyl amine (10 mL, 100 mmol) was added slowly to it and stirred for 15 mins. Then, BF<sub>3</sub>·OEt<sub>2</sub> (12.6 mL (100 mmol) was added to the reaction mixture slowly at 0 °C and stirred overnight at rt. Solvent was evaporated and the product was purified by column chromatography (EA:Hex = 1:10). Product was obtained as brown solid (6.65 g, 86.4%). <sup>1</sup>H NMR (d-acetone, 300 MHz): δ 8.22 (d, j = 9 Hz, 2H), 7.60 (d, j = 6 Hz, 2H), 6.15 (s, 2H), 3.96 (s, 3H), 2.52 (s, 6H), 1.41 (s, 6H). EI-MS (m/z): Calcd for C<sub>21</sub>H<sub>21</sub>BF<sub>2</sub>N<sub>2</sub>O<sub>2</sub> 382.16; found 381.1 (M-H). The above product (5,5-difluoro-10-(4-(methoxycarbonyl)phenyl)-1,3,7,9-tetramethyl-5H-dipyrrolo[1,2-c:2',1'-f][1,3,2]diazaborinin-4-ium-5-uide) (50 mg, 0.13 mmol), (4-formylphenyl)boronic acid (19.6 mg, 0.13 mmol) were dissolved in ACN (1 mL). To it, acetic acid (29.7 μL, 0.52 mmol) and pyrrolidine (43 μL, 0.52 mmol) were added. The reaction mixture was stirred at 85 °C. TLC was monitored in every 5 mins interval. After 20 mins, the reaction mixture was evaporated. The crude product was purified in column chromatography (EA:Hex = 8:2). The product obtained as dark red solid (30.8 mg, 45.9 %). <sup>1</sup>H NMR (d-acetone, 300 MHz): δ 8.24 (d, j = 9Hz, 2H), 7.95 (d, j = 9 Hz, 2H), 7.68-7.62 (m, 5H), 7.28 (s, 1H), 6.91 (s, 1H), 6.21 (s, 1H), 3.97 (s, 3H), 2.58 (s, 3H), 1.48 (s, 3H), 1.44 (s, 3H). HRMS (m/z): Calcd for C<sub>28</sub>H<sub>26</sub>B<sub>2</sub>F<sub>2</sub>N<sub>2</sub>O<sub>4</sub> 514.2047; found 513.1968 (M-H).



## Synthesis of AzG-1

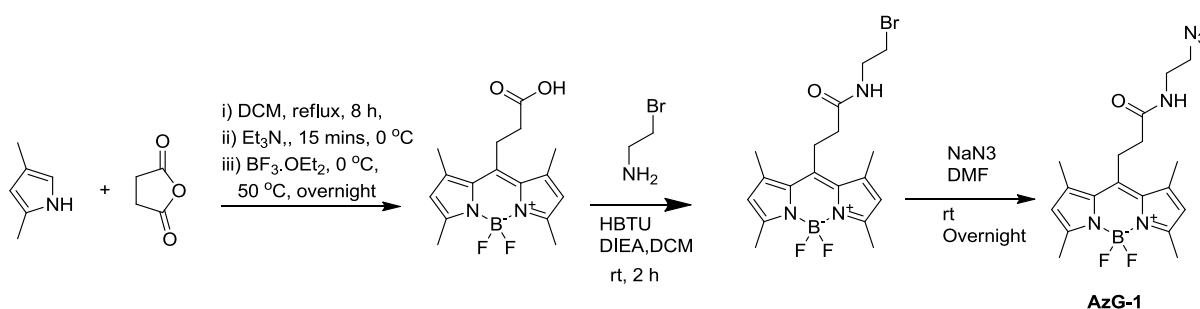

### **3-(4,4-Difluoro-1,3,5,7-tetramethyl-4-bora-3a,4a-diaza-s-indacene-8-yl)-propionic Acid:** In

a RB flask, a mixture of succinic anhydride (32 mg, 0.3 mmol) and 2,4-dimethylpyrrole (60 mg, 0.6 mmol) were dissolved in a mixture of dry CH<sub>3</sub>CN (3 mL) was heated to reflux under nitrogen for 8 h. After the solution was cooled to 0 °C, Et<sub>3</sub>N (180 mg, 18 mmol) was added dropwise and stirred for 15 mins. Then, BF<sub>3</sub>.OEt<sub>2</sub> (340 mg, 24 mmol) was added at 0 °C. The reaction mixture was stirred under N<sub>2</sub> at 50 °C overnight. The mixture was quenched and washed with water and extracted with CH<sub>2</sub>Cl<sub>2</sub>, and then the organic phase was washed with brine and dried over anhydrous Na<sub>2</sub>SO<sub>4</sub>. Compound was purified by column chromatography on silica gel (Hexane : EA = 10:2) afforded pure compound as an orange red powder (34 mg, yield 21%). <sup>1</sup>H NMR (CDCl<sub>3</sub>, 500 MHz) δ: 6.10 (s, 2H); 3.35 (t, 2H, *J* = 8.7Hz); 2.68 (t, 2H, *J* = 8.7Hz); 2.54 (s, 6H); 2.47 (s, 6H). <sup>13</sup>C NMR (CDCl<sub>3</sub>, 125 MHz) δ: 175.69, 159.36, 142.77, 140.36, 131.24, 122.11, 34.85, 23.42, 16.39, 14.52. MS (m/z): 319.3 ([M-H]<sup>+</sup>), found 319.1.

### **10-(3-((2-bromoethyl)amino)-3-oxopropyl)-5,5-difluoro-1,3,7,9-tetramethyl-5H-dipyrrolo[1,2-c:2',1'-f][1,3,2]diazaborinin-4-ium-5-uide:**

3-(4,4-Difluoro-1,3,5,7-tetramethyl-4-bora-3a,4a-diaza-s-indacene-8-yl)-propionic Acid (15 mg, 0.04 mmol), 2-bromoethanamine hydrochloride (19.2 mg, 0.09 mmol), HBTU (35.5 mg, 0.09 mmol) were dissolved in dry DCM in N<sub>2</sub> atmosphere. To the reaction mixture, DIEA (12 mg, 16.3 μL, 0.09 mmol) was added drop wise. The reaction mixture was stirred for 2 h in rt. The

mixture was washed with water and extracted with EA. Then the organic phase was washed with brine and dried over anhydrous Na<sub>2</sub>SO<sub>4</sub>. Compound was purified by column chromatography on silica gel (Hexane : EA = 10:7) afforded pure compound (18.1 mg, yield 91.0 %). <sup>1</sup>H NMR (300 MHz, CDCl<sub>3</sub>) δ 6.05 (s, 2H), 5.94 (s, 1H), 3.65 (q, *J* = 5.8 Hz, 2H), 3.45 (t, *J* = 5.8 Hz, 2H), 3.37 – 3.24 (m, 2H), 2.50 (s, 6H), 2.49 – 2.44 (m, 2H), 2.43 (s, 6H). <sup>13</sup>C NMR (75 MHz, CDCl<sub>3</sub>) δ 170.64, 154.57, 144.05, 140.47, 131.23, 121.93, 41.16, 37.32, 32.00, 29.67, 23.70, 16.47, 14.44, 14.41. MS (m/z):406.10 ([M-F]), found 405.9.

### Synthesis of AzG1:

10-(3-((2-bromoethyl)amino)-3-oxopropyl)-5,5-difluoro-1,3,7,9-tetramethyl-5H-dipyrrolo[1,2-c:2',1'-f][1,3,2]diazaborinin-4-ium-5-uide (18 mg, 0.04 mmol) was dissolved in dry DMF (0.2 mL) in N<sub>2</sub> atmosphere. NaN<sub>3</sub> (8.2 mg, 0.12 mmol) was added to the mixture and stirred overnight at room temperature. The mixture was washed with water and extracted with EA. Then the organic phase was washed with brine and dried over anhydrous Na<sub>2</sub>SO<sub>4</sub>. Compound was purified by column chromatography on silica gel (Hexane : EA = 10:7) afforded pure compound as brown solid (14.8 mg, yield 95.6 %). <sup>1</sup>H NMR (300 MHz, CDCl<sub>3</sub>) δ 6.06 (s, 2H), 5.81 (s, 1H), 3.43 (s, 2H), 3.42 (s, 2H), 3.38 – 3.29 (m, 2H), 2.51 (s, 6H), 2.50 – 2.45 (m, 2H), 2.43 (s, 6H). <sup>13</sup>C NMR (126 MHz, CDCl<sub>3</sub>) δ 170.79, 154.59, 144.07, 140.49, 131.27, 121.93, 50.65, 39.11, 37.36, 23.64, 16.48, 14.46. HRMS (m/z):369.2005 ([M-F]), found 369.1998.

## Synthesis of TPP-BCN

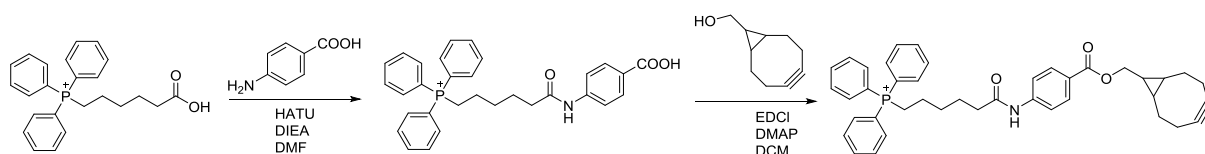

### **(6-((4-carboxyphenyl)amino)-6-oxohexyl)triphenylphosphonium bromide:**

(5-carboxypentyl)triphenylphosphonium bromide (25 mg, 0.066 mmol), 4-aminobenzoic acid (13.7 mg, 0.1 mmol), HATU (38 mg, 0.1 mmol) were dissolved in dry DMF (2 mL). To the reaction mixture, 17  $\mu$ L of DIEA was added and the reaction mixture was stirred for 2h at rt. After reaction, add EA. Solvent was washed with brine and water, organic layer was dried over anhydrous  $\text{Na}_2\text{SO}_4$ . The crude was purified by column chromatography (DCM: MeOH = 9:1). Product was obtained as white solid (12 mg, 36.6 %).  $^1\text{H}$  NMR (500 MHz,  $\text{CDCl}_3$ -MeOD)  $\delta$  8.30 (d,  $J$  = 6.4 Hz, 2H), 8.18 (d,  $J$  = 5.8 Hz, 2H), 8.10 – 7.94 (m, 15H), 3.55 (s, 2H), 2.74 (s, 2H), 2.07 (s, 4H), 1.99 (d,  $J$  = 4.2 Hz, 2H).  $^{13}\text{C}$  NMR (126 MHz,  $\text{CDCl}_3$ -MeOD)  $\delta$  172.50, 168.04, 142.28, 134.84, 132.89, 132.81, 130.28, 130.13, 130.03, 118.47, 117.84, 117.16, 113.07, 35.90, 29.08, 23.80, 21.78, 21.59. EI-MS (m/z): Calcd for  $\text{C}_{31}\text{H}_{31}\text{NO}_3\text{P}^+$  496.57; found 496.2.

### **(6-((4-((bicyclo[6.1.0]non-4-yn-9-ylmethoxy)carbonyl)phenyl)amino)-6-oxohexyl)triphenylphosphonium bromide:**

(6-((4-carboxyphenyl)amino)-6-oxohexyl)triphenylphosphonium bromide (6 mg, 0.012 mmol), bicyclo[6.1.0]non-4-yn-9-ylmethanol (2.7 mg, 0.018 mmol), EDCI (3.45 mg, 0.018 mmol) and DMAP (0.8 mg, 0.006 mmol) were dissolved together in the mixture of DMF and DCM ( 1 mL, v/v=1:9) and stirred for 12h in rt. Water (0.5 mL) was added to the reaction mixture and the organic layer was extracted in DCM. The crude was purified by column chromatography (DCM: MeOH = 9:1). Product was obtained as white solid (4 mg, 53.0 %).  $^1\text{H}$  NMR (500 MHz, DMSO)  $\delta$  10.24 (s, 1H), 7.95 – 7.84 (m, 4H), 7.84 – 7.68 (m, 15H), 4.39 – 4.23 (m, 2H), 3.46 (dd,  $J$  = 7.5, 4.8 Hz, 2H), 2.27 – 2.08 (m, 8H), 1.67 – 1.38 (m, 8H), 0.78-0.74 (m, 3H);  $^{13}\text{C}$  NMR (126

MHz, DMSO)  $\delta$  172.08, 165.90, 144.07, 135.37, 134.09, 134.01, 130.75, 130.66, 124.53, 119.36, 118.84, 118.68, 99.58, 99.45, 62.83, 57.76, 36.57, 29.15, 29.09, 24.62, 21.71, 21.44, 21.32, 20.33, 19.71, 17.73. EI-MS (m/z): Calcd for  $C_{41}H_{43}NO_3P^+$  628.77; found 628.3.

### Synthesis of library in the training set

General procedure for the synthesis of **BDNCA** library: Purified aniline bodipy compound (BDN Library)<sup>8</sup> (1eq) was diluted in DCM/ACN (2/1), 10  $\mu$ L of  $NaHCO_3$  saturated solution was added and chloroacetyl chloride (5 eq.) was added immediately. Organic layer was washed with  $NaHCO_3$  saturated solution twice. Product identity and purity was confirmed with LC-MS chromatography.

General procedure for the synthesis of **TAM** libraries: **TAM** (1/1'/2/3) acid (1 eq), N-hydroxysuccinimide (1 eq), EDCI (1.5 eq), DMAP (0.2 eq) were dissolved in THF and stirred overnight at room temperature. The NHS-active ester formed was treated with amine (1eq) and stirred at room temperature for 6h. The crude amide was purified by preparative TLC. Product identity and purity was confirmed with LC-MS chromatography. Spectroscopic and quantum yield data were measured on a SpectraMax M2 spectrophotometer (Molecular Devices). Quantum yields were obtained by comparing the areas under the corrected emission spectrum in its respective solvents. The Supplementary Equation (1) was used to calculate quantum yield:

$$\Phi_x = \Phi_{ref}(I_x/I_{ref})(A_{ref}/A_x)(\eta_x^2/\eta_{ref}^2) \quad (1)$$

Where  $\Phi_{st}$  is the reported quantum yield of the standard, I is the integrated emission spectrum, A is the absorbance at the excitation wavelength, and  $\eta_x$  is the refractive index of the solvents used. The subscript x and ref denotes unknown and reference, respectively.

## Supplementary References.

1. Petitjean, M. Applications of the radius-diameter diagram to the classification of topological and geometrical shapes of chemical compounds. *J. Chem. Inf. Comput. Sci.* **32**, 331–337 (1992).
2. Hall, L. H. & Kier, L. B. The Molecular Connectivity Chi Indexes and Kappa Shape Indexes in Structure-Property Relations. *Review in Computational Chemistry.* **9**, 367–422 (1991).
3. Hou, T. J., Xia, K., Zhang, W & Xu, X. J. ADME Evaluation in Drug Discovery. 4. Prediction of Aqueous Solubility Based on Atom Contribution Approach. *J. Chem. Inf. Comput. Sci.* **44**, 266–275 (2004).
4. Wildman, S. A. & Crippen, G. M. Prediction of Physicochemical Parameters by Atomic Contributions. *J. Chem. Inf. Comput. Sci.* **39**, 868–873 (1999).
5. Ertl, P., Rohde, B. & Selzer, P. J. Fast Calculation of Molecular Polar Surface Area as a Sum of Fragment-Based Contributions and Its Application to the Prediction of Drug Transport Properties. *Med. Chem.* **43**, 3714–3717 (2000).
6. Vendrell, M. *et al.* Solid-phase synthesis of BODIPY dyes and development of an immunoglobulin fluorescent sensor. *Chem. Commun.* **47**, 8424–8426 (2011).
7. Yun, S. -W. *et al.* Neural stem cell specific fluorescent chemical probe binding to FABP7. *Proc. Natl. Acad. Sci. USA.* **109**, 10214–10217 (2012).
8. Kang, N.Y. *et al.* Visualization and isolation of Langerhans islets by fluorescent probe PiY. *Angew. Chem. Int. Ed.* **52**, 8557–8560 (2013).
9. Lee, J. S. *et al.* Synthesis of a BODIPY Library and Its Application to the Development of Live Cell Glucagon Imaging Probe. *J. Am. Chem. Soc.* **131**, 10077–10082 (2009).
10. Lee, J. S. *et al.* Accelerating fluorescent sensor discovery: unbiased screening of a diversity-oriented BODIPY library. *Chem. Commun.* **47**, 2339–2341 (2011).
